# Supplementary material for: Dual orexin and MCH neuron-ablated mice display severe sleep attacks and cataplexy
Source: eLife. 2020 Apr 21;9:e54275. doi: 10.7554/eLife.54275 (PMC7173968; doi:10.7554/eLife.54275)
Supplement: Figure 1—figure supplement 1—source data 1. [file elife-54275-fig1-figsupp1-data1.xlsx]

## Sheet: Raw data
	MCH/vGlut2							OX/vGlut2
	Type	1 (MCH)	2 (vGlut2)	3(non-overlap)	MCH/vGlut	vGlut/MCH		Type	1 (OX)	2 (vGlut2)	3(non-overlap)	Ox/vGlut	vGlut/Ox
	MCHVGlut_XY06-R	68	259	0	0.207951	1		OXVGlut_XY01-L	53	173	1	0.230088	0.981132
	MCHVGlut_XY03-L	21	239	0	0.0807692	1		OXVGlut_XY01-R	60	236	0	0.202703	1
	MCHVGlut_XY03-R	27	185	1	0.122642	0.962963		OXVGlut_XY02-R	75	144	0	0.342466	1
	MCHVGlut_XY04-L	51	306	0	0.142857	1		OXVGlut_XY08-L	90	238	1	0.271341	0.988889
	MCHVGlut_XY04-R	65	295	0	0.180556	1		OXVGlut_XY09-L	46	299	0	0.133333	1
	MCHVGlut_XY05-L	35	268	3	0.105611	0.914286		OXVGlut_XY09-R	53	242	0	0.179661	1
	MCHVGlut_XY05-R	43	244	7	0.125436	0.837209		OXVGlut_XY10-L	67	269	0	0.199405	1
					MCH/vGlut	vGlut/MCH						Ox/vGlut	vGlut/Ox
	AVE				0.137974	0.959208		AVE				0.222714	0.995717
	SEM				0.0165082	0.0236903		SEM				0.0256096	0.00289113
	MCH/vGAT							OX/vGAT
	Type	1 (MCH)	2 (vGAT)	3 (overlap)	MCH/vGAT	vGAT/MCH		Type	1 (OX)	2 (vGAT)	3 (overlap)	Ox/vGAT	vGAT/Ox
	MCHVGAT_XY01-L	25	439	2	0.00455581	0.08		OXVGAT_XY07-L	82	352	0	0	0
	MCHVGAT_XY01-R	33	344	1	0.00290698	0.030303		OXVGAT_XY07-R	76	407	0	0	0
	MCHVGAT_XY02-L	30	392	1	0.00255102	0.0333333		OXVGAT_XY06-L	85	404	2	0.0049505	0.0235294
	MCHVGAT_XY02-R	33	356	1	0.00280899	0.030303		OXVGAT_XY06-R	67	367	2	0.00544959	0.0298507
	MCHVGAT_XY03-L	27	365	0	0	0		OXVGAT_XY08-L	53	312	1	0.00320513	0.0188679
	MCHVGAT_XY03-R	41	294	3	0.0102041	0.0731707		OXVGAT_XY08-R	27	273	1	0.003663	0.037037
	MCHVGAT_XY05-L	40	395	3	0.00759494	0.075
					MCH/vGAT	vGAT/MCH						Ox/vGAT	vGAT/Ox
	AVE				0.00437454	0.0460157		AVE				0.00287804	0.0182142
	SEM				0.00130433	0.0114481		SEM				0.00096949	0.00627668
					0.00437454	0.0460157	0.00287804	0.0182142
					0.00130433	0.0114481	0.00096949	0.00627668
				MCH/vGlut	0.00437454	0.00130433
				vGlut/MCH	0.00287804	0.00096949
				Ox/vGlut	0.0460157	0.0114481
				vGlut/Ox	0.0182142	0.00627668

## Sheet: Calculation
MCH/vGlut2									OX/vGlut2
Type	1 (MCH)	2 (vGlut2)	3(non-overlap)	MCH/vGlut	vGlut/MCH				Type	1 (OX)	2 (vGlut2)	3(non-overlap)	Ox/vGlut	vGlut/Ox
n1-R	68	259	0	0.207951	1				n1-L	53	173	1
n2-L	21	239	0						n1-R	60	236	0
n2-R	27	185	1							56.5	204.5	0.5	0.214559	0.99115
	24	212	0.5	0.0995763	0.979167				n2-R	75	144	0	0.342466	1
n3-L	51	306	0						n3-L	90	238	1	0.271341	0.988889
n3-R	65	295	0						n4-L	46	299	0
	58	300.5	0	0.161785	1				n4-R	53	242	0
n5-L	35	268	3							49.5	270.5	0	0.154688	1
n5-R	43	244	7						n5-L	67	269	0	0.199405	1
	39	256	5	0.115254	0.871795
				MCH/vGlut	vGlut/MCH								Ox/vGlut	vGlut/Ox
AVE				0.146142	0.96274				AVE				0.236492	0.996008
SEM				0.0244736	0.0307103				SEM				0.0323986	0.00247069
MCH/vGAT									OX/vGAT
Type	1 (MCH)	2 (vGAT)	3 (overlap)	MCH/vGAT	vGAT/MCH				Type	1 (OX)	2 (vGAT)	3 (overlap)	Ox/vGAT	vGAT/Ox
n1-L	25	439	2						n2-L	82	352	0
n1-R	33	344	1						n2-R	76	407	0
	29	391.5	1.5	0.00383142	0.0517241					79	379.5	0	0	0
n2-L	30	392	1						n3-L	85	404	2
n2-R	33	356	1						n3-R	67	367	2
	31.5	374	1	0.0026738	0.031746					76	385.5	2	0.00518807	0.0263158
n3-L	27	365	0						n4-L	53	312	1
n3-R	41	294	3						n4-R	27	273	1
	34	329.5	1.5	0.00455235	0.0441176					40	292.5	1	0.0034188	0.025
n5-L	40	395	3	0.00759494	0.075
				MCH/vGAT	vGAT/MCH								Ox/vGAT	vGAT/Ox
AVE				0.00466313	0.050647				AVE				0.00286896	0.0171053
SEM				0.00105107	0.00910178				SEM				0.00152269	0.00856106
