# Supplementary material for: Dual orexin and MCH neuron-ablated mice display severe sleep attacks and cataplexy
Source: eLife. 2020 Apr 21;9:e54275. doi: 10.7554/eLife.54275 (PMC7173968; doi:10.7554/eLife.54275)
Supplement: Figure 1—source data 1. [file elife-54275-fig1-data1.xlsx]

## Sheet: Number of neurons
	0 w				Minus 2 w				Minus 4 w
	MCH	orexin			MCH	orexin			MCH	orexin
N1	1131	976		N1	525	271		N1	31	21
N2	1017	765		N2	527	249		N2	11	9
N3	946	688		N3	528	159		N3	73	10
								N4	12	8
								N5	53	23
								N6	48	22
	MCH	orexin			MCH	orexin			MCH	orexin
AVE	1031.33	809.667		AVE	526.667	226.333		AVE	38	15.5
SEM	53.8836	86.0859		SEM	0.881917	34.2604		SEM	10.0067	2.92973
					Plus 2 w				Plus 4 w
					MCH	orexin			MCH	orexin
				N1	953	819		N1	1344	864
				N2	941	841		N2	1407	962
				N3	980	888		N3	894	747
								N4	1094	790
					MCH	orexin			MCH	orexin
				AVE	958	849.333		AVE	1184.75	840.75
				SEM	11.5326	20.3497		SEM	118.155	47.0875
MCH
			0w	minus 2 w	minus 4 w		%	0w	minus 2 w	minus 4 w
		AVE	1031.33	526.667	38			1	0.549756	0.0320743
		SEM	53.8836	0.881917	10.0067
				plus 2 w	plus 4 w				plus 2 w	plus 4 w
		AVE		958	1184.75				0.928895	1.14876
		SEM		11.5326	118.155
Ox
			0w	minus 2 w	minus 4 w		%	0w	minus 2 w	minus 4 w
		AVE	809.667	226.333	15.5			1	0.266484	0.0184359
		SEM	86.0859	34.2604	2.92973
				plus 2 w	plus 4 w				plus 2 w	plus 4 w
		AVE		849.333	840.75				1.04899	1.03839
		SEM		20.3497	47.0875
			Ttest	Orexin	MCH
			0	-	-
			2	9.77431e-05	3.08737e-06
			4	1.88164e-08	1.92825e-06
