# Supplementary material for: Dual orexin and MCH neuron-ablated mice display severe sleep attacks and cataplexy
Source: eLife. 2020 Apr 21;9:e54275. doi: 10.7554/eLife.54275 (PMC7173968; doi:10.7554/eLife.54275)
Supplement: Figure 3—source data 1. [file elife-54275-fig3-data1.xlsx]

## Sheet: FFT of each stages
Mice number			N1		N2		N3		N4		N5		N6		N7		N8
				W		W		W		W		W		W		W		W			W
Wake			Hz		Hz		Hz		Hz		Hz		Hz		Hz		Hz			Hz	ave	SEM							N1	N2	N3	N4	N5	N6	N7	N8				N1	N2	N3	N4	N5	N6	N7	N8
			0	0.0348125	0	0.0807821	0	0.0224163	0	0.026343	0	0.0277792	0	0.0203358	0	0.0197939	0	0.0293573		0	0.0327025	0.00709294					Delta	W	0.487677	0.514945	0.471885	0.41114	0.39785	0.337909	0.367577	0.435327		Theta	W	0.346222	0.316268	0.37719	0.41476	0.410582	0.48082	0.461844	0.376195
			1	0.176864	1	0.399689	1	0.111651	1	0.131024	1	0.141878	1	0.102422	1	0.0978394	1	0.147794		1	0.163645	0.034965						R	0.395442	0.402985	0.304151	0.322272	0.375922	0.260744	0.269194	0.298875			R	0.426894	0.413694	0.523145	0.501269	0.429226	0.576654	0.579768	0.523024
			2	0.262232	2	0.503769	2	0.190026	2	0.191965	2	0.208154	2	0.166985	2	0.17399	2	0.254371		2	0.243936	0.0391102						S	0.560639	0.576333	0.537639	0.526073	0.441292	0.441292	0.506737	0.479134			S	0.269867	0.262929	0.30729	0.304858	0.350604	0.350604	0.310409	0.330771
			3	0.314754	3	0.506906	3	0.243261	3	0.242002	3	0.24134	3	0.205819	3	0.256108	3	0.335368		3	0.293195	0.0339981						DT	0.489623	0.466466	0.461466	0.398383		0.309875	0.417643	0.406563			DT	0.335001	0.339739	0.375544	0.410364		0.470178	0.384654	0.402168
			4	0.318198	4	0.478632	4	0.25474	4	0.269649	4	0.271649	4	0.206621	4	0.281866	4	0.360389		4	0.305218	0.0294265						C	0.371044	0.365231	0.277891	0.295437		0.185672	0.275484	0.276773			C	0.459949	0.443574	0.542752	0.553364		0.658445	0.600089	0.546379
			5	0.281612	5	0.425189	5	0.234473	5	0.268776	5	0.281574	5	0.210186	5	0.245977	5	0.339001		5	0.285848	0.024099
			6	0.234763	6	0.36536	6	0.210188	6	0.260527	6	0.270084	6	0.241143	6	0.238381	6	0.302392		6	0.265355	0.0172748					Theta	W	0.346222	0.316268	0.37719	0.41476	0.410582	0.48082	0.461844	0.376195
			7	0.205639	7	0.30761	7	0.191553	7	0.249555	7	0.238203	7	0.27411	7	0.270054	7	0.275228		7	0.251494	0.0136566						R	0.426894	0.413694	0.523145	0.501269	0.429226	0.576654	0.579768	0.523024
			8	0.202817	8	0.290779	8	0.182722	8	0.247533	8	0.23349	8	0.310879	8	0.315234	8	0.26493		8	0.256048	0.01721						S	0.269867	0.262929	0.30729	0.304858	0.350604	0.350604	0.310409	0.330771				Theta
			9	0.180854	9	0.256736	9	0.143271	9	0.207816	9	0.234829	9	0.269327	9	0.299368	9	0.226351		9	0.227319	0.0176685						DT	0.335001	0.339739	0.375544	0.410364		0.470178	0.384654	0.402168				W	R	S	DT	C
			10	0.136945	10	0.200837	10	0.0988906	10	0.147703	10	0.204618	10	0.17384	10	0.203505	10	0.172838		10	0.167397	0.0132873						C	0.459949	0.443574	0.542752	0.553364		0.658445	0.600089	0.546379			N1	0.346222	0.426894	0.269867	0.335001	0.459949
			11	0.10229	11	0.154861	11	0.0706266	11	0.107285	11	0.155589	11	0.111038	11	0.122593	11	0.140651		11	0.120617	0.0102691																	N2	0.316268	0.413694	0.262929	0.339739	0.443574
			12	0.0809598	12	0.126603	12	0.0533814	12	0.0830722	12	0.114174	12	0.083572	12	0.0862726	12	0.115567		12	0.0929502	0.00848743					Alpha	W	0.120147	0.117465	0.104873	0.131277	0.153405	0.137088	0.129883	0.143507			N3	0.37719	0.523145	0.30729	0.375544	0.542752
			13	0.0627555	13	0.102368	13	0.0421347	13	0.066727	13	0.0774287	13	0.0680988	13	0.0671999	13	0.0890513		13	0.0719704	0.00638898						R	0.133305	0.133599	0.125111	0.132919	0.146829	0.127699	0.114874	0.136786			N4	0.41476	0.501269	0.304858	0.410364	0.553364
			14	0.0485375	14	0.0799576	14	0.0346811	14	0.0531243	14	0.054032	14	0.0548902	14	0.0536469	14	0.0712004		14	0.0562587	0.00487994						S	0.128712	0.118048	0.117814	0.132227	0.165316	0.165316	0.143392	0.151519			N5	0.410582	0.429226	0.350604
			15	0.0389518	15	0.0641017	15	0.0290088	15	0.0421137	15	0.0401162	15	0.0442933	15	0.0433462	15	0.0572169		15	0.0448936	0.00387703						DT	0.133913	0.145729	0.119028	0.14685		0.168781	0.151729	0.148935			N6	0.48082	0.576654	0.350604	0.470178	0.658445
			16	0.0314175	16	0.0533151	16	0.0247691	16	0.0337799	16	0.0307734	16	0.0356344	16	0.0351982	16	0.045022		16	0.0362387	0.00316484						C	0.129572	0.146077	0.130662	0.113542		0.12073	0.0954978	0.137719			N7	0.461844	0.579768	0.310409	0.384654	0.600089
			17	0.0236533	17	0.0390456	17	0.0195847	17	0.0237636	17	0.0219949	17	0.0256552	17	0.0257559	17	0.0322888		17	0.0264678	0.00221952																	N8	0.376195	0.523024	0.330771	0.402168	0.546379
			18	0.0172598	18	0.0271203	18	0.0151215	18	0.0158434	18	0.0149126	18	0.017503	18	0.0179476	18	0.0213257		18	0.0183792	0.00144146					Beta	W	0.0334123	0.033347	0.0358232	0.0330071	0.028507	0.0364798	0.0338041	0.036077
			19	0.0121201	19	0.0183547	19	0.0112355	19	0.00979336	19	0.00920891	19	0.0111508	19	0.0115441	19	0.0131845		19	0.012074	0.000999364						R	0.0381376	0.0428141	0.0425587	0.0380776	0.0412701	0.0308523	0.0321721	0.0363539
			20	0.00829282	20	0.0120272	20	0.00779691	20	0.00540426	20	0.00512357	20	0.00635824	20	0.00664844	20	0.00726134		20	0.00736409	0.000769849						S	0.027462	0.0283741	0.0277195	0.0259043	0.0343807	0.0343807	0.0303579	0.0306155
																												DT	0.036567	0.0420632	0.0397109	0.0396204		0.046531	0.0411441	0.0382743
			Delta	0.487677	Delta	0.514945	Delta	0.471885	Delta	0.41114	Delta	0.39785	Delta	0.337909	Delta	0.367577	Delta	0.435327		Delta	0.428039	0.0215726						C	0.0346474	0.0403219	0.0451072	0.0334203		0.0324162	0.026078	0.0353975
			Theta	0.346222	Theta	0.316268	Theta	0.37719	Theta	0.41476	Theta	0.410582	Theta	0.48082	Theta	0.461844	Theta	0.376195		Theta	0.397985	0.0196597
			Alpha	0.120147	Alpha	0.117465	Alpha	0.104873	Alpha	0.131277	Alpha	0.153405	Alpha	0.137088	Alpha	0.129883	Alpha	0.143507		Alpha	0.129706	0.00545606
			Beta	0.0334123	Beta	0.033347	Beta	0.0358232	Beta	0.0330071	Beta	0.028507	Beta	0.0364798	Beta	0.0338041	Beta	0.036077		Beta	0.0338072	0.000900974				one-way ANOVA			Delta	Theta
																												S R	7.20801e-06	4.07112e-06
																												DT R	0.02592	0.00661
																												DT S	0.0408	0.0879
																												C R	1	0.75327
																												C S	5.83393e-07	1.45158e-07
				R		R		R		R		R		R		R		R			R							C DT	0.00162	0.000161143
			Hz		Hz		Hz		Hz		Hz		Hz		Hz		Hz			Hz	ave	SEM
REM			0	0.0171273	0	0.0175511	0	0.0128691	0	0.0169413	0	0.0149204	0	0.0193912	0	0.0167293	0	0.0166147		0	0.0165181	0.000678689
			1	0.0835041	1	0.0849418	1	0.062632	1	0.0851435	1	0.0775441	1	0.0833839	1	0.0853975	1	0.0773267		1	0.0799842	0.00273392
			2	0.212996	2	0.197384	2	0.12585	2	0.166483	2	0.15637	2	0.178089	2	0.174755	2	0.166478		2	0.172301	0.00926205
			3	0.310517	3	0.307613	3	0.188287	3	0.277934	3	0.222562	3	0.313813	3	0.32133	3	0.25162		3	0.274209	0.017319
			4	0.266185	4	0.247991	4	0.207645	4	0.257668	4	0.207755	4	0.33793	4	0.323401	4	0.246211		4	0.261848	0.0168577
			5	0.215283	5	0.186002	5	0.193155	5	0.212432	5	0.16644	5	0.335017	5	0.223282	5	0.259353		5	0.223871	0.0186573
			6	0.23303	6	0.23401	6	0.264651	6	0.277276	6	0.179687	6	0.528765	6	0.353972	6	0.407495		6	0.309861	0.0403344
			7	0.304057	7	0.300549	7	0.375303	7	0.425521	7	0.250349	7	0.837165	7	0.706806	7	0.531421		7	0.466396	0.0744023
			8	0.298963	8	0.250964	8	0.343307	8	0.436356	8	0.252735	8	0.730431	8	0.721655	8	0.407854		8	0.430283	0.0686626
			9	0.202874	9	0.163978	9	0.21566	9	0.258914	9	0.160312	9	0.411295	9	0.420217	9	0.238727		9	0.258997	0.036202
			10	0.136136	10	0.101642	10	0.138512	10	0.156826	10	0.105372	10	0.252907	10	0.227106	10	0.166211		10	0.160589	0.0191805
			11	0.101025	11	0.0950541	11	0.0947998	11	0.11552	11	0.0893684	11	0.180239	11	0.148173	11	0.126973		11	0.118894	0.0112099
			12	0.0838573	12	0.0847525	12	0.0732609	12	0.0914722	12	0.0703615	12	0.151536	12	0.109933	12	0.0998004		12	0.0956217	0.00922007
			13	0.0723704	13	0.064758	13	0.061321	13	0.0777276	13	0.0615518	13	0.11615	13	0.0861692	13	0.0878133		13	0.0784827	0.0065089
			14	0.0595312	14	0.0505662	14	0.0473248	14	0.0686796	14	0.0550816	14	0.0900651	14	0.0734416	14	0.0785031		14	0.0653991	0.0052494
			15	0.050148	15	0.0443283	15	0.0431421	15	0.058903	15	0.0480839	15	0.073333	15	0.0637111	15	0.0650345		15	0.0558355	0.00389183
			16	0.0378064	16	0.0406382	16	0.036716	16	0.0474547	16	0.0371388	16	0.0588267	16	0.0527069	16	0.0480173		16	0.0449131	0.00288728
			17	0.0267644	17	0.0276513	17	0.0297657	17	0.0328279	17	0.0235038	17	0.0401261	17	0.0374824	17	0.0327684		17	0.0313613	0.00197123
			18	0.0188855	18	0.0183029	18	0.020222	18	0.0202613	18	0.0152222	18	0.0252805	18	0.0233265	18	0.0211979		18	0.0203374	0.00109006
			19	0.0130152	19	0.0132095	19	0.013368	19	0.0116033	19	0.00966481	19	0.0154173	19	0.0138132	19	0.0127331		19	0.012853	0.000592466
			20	0.00850524	20	0.00898319	20	0.00873066	20	0.00596628	20	0.00566446	20	0.00804566	20	0.00750152	20	0.00703955		20	0.00755457	0.000441837
			Delta	0.395442	Delta	0.402985	Delta	0.304151	Delta	0.322272	Delta	0.375922	Delta	0.260744	Delta	0.269194	Delta	0.298875		Delta	0.328698	0.0197734
			Theta	0.426894	Theta	0.413694	Theta	0.523145	Theta	0.501269	Theta	0.429226	Theta	0.576654	Theta	0.579768	Theta	0.523024		Theta	0.496709	0.0235364
			Alpha	0.133305	Alpha	0.133599	Alpha	0.125111	Alpha	0.132919	Alpha	0.146829	Alpha	0.127699	Alpha	0.114874	Alpha	0.136786		Alpha	0.13139	0.00328471
			Beta	0.0381376	Beta	0.0428141	Beta	0.0425587	Beta	0.0380776	Beta	0.0412701	Beta	0.0308523	Beta	0.0321721	Beta	0.0363539		Beta	0.0377796	0.00159268
				S		S		S		S		S		S		S		S			S
			Hz		Hz		Hz		Hz		Hz		Hz		Hz		Hz			Hz	ave	SEM
NREM			0	0.0822518	0	0.0825796	0	0.0593368	0	0.0754077	0	0.0846691	0	0.059772	0	0.063109	0	0.0571443		0	0.0705338	0.00418665
			1	0.427185	1	0.439036	1	0.299171	1	0.390928	1	0.425584	1	0.300278	1	0.320175	1	0.282664		1	0.360627	0.0234707
			2	0.78473	2	0.773964	2	0.62829	2	0.746542	2	0.785943	2	0.587144	2	0.657974	2	0.60522		2	0.696226	0.0300941
			3	0.957824	3	0.869152	3	0.887571	3	0.93141	3	1	3	0.8277	3	0.958315	3	0.895385		3	0.91592	0.0198467
			4	0.764531	4	0.718258	4	0.853712	4	0.874657	4	0.918401	4	0.785817	4	0.944744	4	0.905101		4	0.845652	0.0286425
			5	0.527718	5	0.524174	5	0.676172	5	0.683145	5	0.657467	5	0.636564	5	0.631333	5	0.750964		5	0.635942	0.0273097
			6	0.425422	6	0.405514	6	0.537037	6	0.549456	6	0.516724	6	0.579905	6	0.483195	6	0.6274		6	0.515582	0.0265728
			7	0.369542	7	0.32783	7	0.435694	7	0.474239	7	0.421108	7	0.557317	7	0.472302	7	0.536405		7	0.449305	0.0275493
			8	0.323582	8	0.315175	8	0.36299	8	0.417272	8	0.354844	8	0.510994	8	0.458483	8	0.457482		8	0.400103	0.0252791
			9	0.286024	9	0.254414	9	0.30829	9	0.352868	9	0.325724	9	0.449723	9	0.39954	9	0.396631		9	0.346652	0.023165
			10	0.261879	10	0.213779	10	0.267792	10	0.30782	10	0.323116	10	0.394793	10	0.338133	10	0.356429		10	0.307968	0.0205445
			11	0.231735	11	0.19791	11	0.225695	11	0.26796	11	0.304779	11	0.337478	11	0.294449	11	0.31716		11	0.272146	0.0175133
			12	0.191262	12	0.162693	12	0.177869	12	0.223031	12	0.247098	12	0.28057	12	0.241463	12	0.264397		12	0.223548	0.0150168
			13	0.153699	13	0.13365	13	0.137752	13	0.177896	13	0.191087	13	0.231794	13	0.19583	13	0.212308		13	0.179252	0.012482
			14	0.124002	14	0.104451	14	0.108324	14	0.13831	14	0.149144	14	0.185473	14	0.1504	14	0.167533		14	0.140955	0.00994292
			15	0.0941076	15	0.0822602	15	0.0833415	15	0.104358	15	0.114598	15	0.140051	15	0.111803	15	0.126241		15	0.107095	0.00718167
			16	0.0663744	16	0.0633164	16	0.0623652	16	0.0741909	16	0.0797228	16	0.100237	16	0.0851337	16	0.089988		16	0.0776661	0.00481977
			17	0.0447071	17	0.0434184	17	0.0445268	17	0.0484128	17	0.0492751	17	0.0658449	17	0.0568466	17	0.0592859		17	0.0515397	0.00289559
			18	0.0289474	18	0.028032	18	0.0313238	18	0.0299688	18	0.0289015	18	0.0415233	18	0.0357947	18	0.0372984		18	0.0327237	0.00173319
			19	0.0181195	19	0.0177995	19	0.0208528	19	0.0171329	19	0.0163671	19	0.0241239	19	0.0213825	19	0.021813		19	0.0196989	0.000963655
			20	0.0114315	20	0.0111098	20	0.0133882	20	0.00887594	20	0.00829877	20	0.012711	20	0.0112738	20	0.0113794		20	0.0110586	0.000609872
			Delta	0.560639	Delta	0.576333	Delta	0.537639	Delta	0.526073	Delta	0.540836	Delta	0.441292	Delta	0.506737	Delta	0.479134		Delta	0.521085	0.0156059
			Theta	0.269867	Theta	0.262929	Theta	0.30729	Theta	0.304858	Theta	0.277247	Theta	0.350604	Theta	0.310409	Theta	0.330771		Theta	0.301747	0.0107473
			Alpha	0.128712	Alpha	0.118048	Alpha	0.117814	Alpha	0.132227	Alpha	0.143756	Alpha	0.165316	Alpha	0.143392	Alpha	0.151519		Alpha	0.137598	0.00584773
			Beta	0.027462	Beta	0.0283741	Beta	0.0277195	Beta	0.0259043	Beta	0.0260701	Beta	0.0343807	Beta	0.0303579	Beta	0.0306155		Beta	0.0288605	0.000998338
				DT		DT		DT		DT		DT		DT		DT		DT			DT
			Hz		Hz		Hz		Hz		Hz		Hz		Hz		Hz			Hz	ave	SEM
DT sleep			0	0.026255	0	0.0366363	0	0.0230505	0	0.0279951	0	none	0	0.0300419	0	0.0303412	0	0.030589		0	0.0292727	0.00159719
			1	0.128051	1	0.202	1	0.137888	1	0.124632	1	none	1	0.112944	1	0.12787	1	0.145737		1	0.139874	0.011062
			2	0.421071	2	0.473884	2	0.290933	2	0.361091	2	none	2	0.306552	2	0.419521	2	0.370176		2	0.377604	0.0247868
			3	0.767896	3	0.719914	3	0.506628	3	0.611186	3	none	3	0.50731	3	0.78048	3	0.643266		3	0.648097	0.0431649
			4	0.711616	4	0.760097	4	0.753608	4	0.632847	4	none	4	0.465578	4	0.72914	4	0.940933		4	0.713403	0.0542754
			5	0.596806	5	0.690699	5	0.813512	5	0.602231	5	none	5	0.616141	5	0.566709	5	0.96369		5	0.692827	0.0550217
			6	0.492091	6	0.607828	6	0.661976	6	0.573298	6	none	6	0.784469	6	0.529003	6	0.862768		6	0.644491	0.0512975
			7	0.436576	7	0.492957	7	0.531929	7	0.62466	7	none	7	0.810382	7	0.618878	7	0.761401		7	0.610969	0.0519231
			8	0.367875	8	0.400888	8	0.390212	8	0.562675	8	none	8	0.67215	8	0.535934	8	0.580264		8	0.501428	0.0438115
			9	0.269017	9	0.28908	9	0.257626	9	0.37551	9	none	9	0.459423	9	0.401636	9	0.459579		9	0.358839	0.0329334
			10	0.230769	10	0.282494	10	0.194863	10	0.265969	10	none	10	0.321142	10	0.331022	10	0.366669		10	0.284704	0.0226398
			11	0.203573	11	0.272792	11	0.171835	11	0.240485	11	none	11	0.258955	11	0.275136	11	0.291095		11	0.244839	0.0162493
			12	0.163255	12	0.209008	12	0.149404	12	0.212125	12	none	12	0.245444	12	0.228341	12	0.246128		12	0.207672	0.014411
			13	0.139761	13	0.15375	13	0.127403	13	0.151625	13	none	13	0.212499	13	0.186262	13	0.232906		13	0.172029	0.014904
			14	0.118119	14	0.133842	14	0.107305	14	0.123453	14	none	14	0.202967	14	0.149539	14	0.19429		14	0.147074	0.0142364
			15	0.0933544	15	0.119914	15	0.0895514	15	0.131919	15	none	15	0.17413	15	0.113915	15	0.157937		15	0.125817	0.0119009
			16	0.0712708	16	0.0956344	16	0.0741593	16	0.101838	16	none	16	0.127185	16	0.0971681	16	0.11682		16	0.0977251	0.00772943
			17	0.0504831	17	0.0660631	17	0.0572254	17	0.0598914	17	none	17	0.0854799	17	0.0754344	17	0.0795082		17	0.0677265	0.00484318
			18	0.0366062	18	0.0455379	18	0.0406712	18	0.036329	18	none	18	0.0486846	18	0.0466179	18	0.0492693		18	0.043388	0.00207537
			19	0.0229667	19	0.0308307	19	0.0261053	19	0.0221954	19	none	19	0.0261352	19	0.0246438	19	0.0286793		19	0.0259366	0.00115501
			20	0.0147515	20	0.0186234	20	0.017194	20	0.0116687	20	none	20	0.014117	20	0.0146112	20	0.0141534		20	0.015017	0.000855618
			Delta	0.489623	Delta	0.466466	Delta	0.461466	Delta	0.398383	Delta	none	Delta	0.309875	Delta	0.417643	Delta	0.406563		Delta	0.421431	0.0226213
			Theta	0.335001	Theta	0.339739	Theta	0.375544	Theta	0.410364	Theta	none	Theta	0.470178	Theta	0.384654	Theta	0.402168		Theta	0.388235	0.0174288
			Alpha	0.133913	Alpha	0.145729	Alpha	0.119028	Alpha	0.14685	Alpha	none	Alpha	0.168781	Alpha	0.151729	Alpha	0.148935		Alpha	0.144995	0.00583041
			Beta	0.036567	Beta	0.0420632	Beta	0.0397109	Beta	0.0396204	Beta	none	Beta	0.046531	Beta	0.0411441	Beta	0.0382743		Beta	0.0405587	0.0012054
				C		C		C		C		C		C		C		C			C
			Hz		Hz		Hz		Hz		Hz		Hz		Hz		Hz			Hz	ave	SEM
Cataplexy			0	0.0173611	0	0.0145948	0	0.0114323	0	0.0132114	0	none	0	0.011553	0	0.0116862	0	0.0130051		0	0.0132634	0.000807688
			1	0.0731766	1	0.0655316	1	0.06006	1	0.0560993	1	none	1	0.0478586	1	0.0438261	1	0.0577675		1	0.0577599	0.00377431
			2	0.187029	2	0.14984	2	0.122904	2	0.141064	2	none	2	0.0936132	2	0.116564	2	0.122459		2	0.133353	0.0112349
			3	0.35381	3	0.288805	3	0.193883	3	0.249597	3	none	3	0.171746	3	0.284119	3	0.239168		3	0.254447	0.0232473
			4	0.38845	4	0.323796	4	0.234897	4	0.2566	4	none	4	0.218813	4	0.379167	4	0.282202		4	0.297703	0.0256581
			5	0.34295	5	0.283548	5	0.27376	5	0.217844	5	none	5	0.251858	5	0.305495	5	0.263316		5	0.276967	0.0150662
			6	0.353252	6	0.296449	6	0.376079	6	0.271359	6	none	6	0.367438	6	0.360713	6	0.38227		6	0.343937	0.0161434
			7	0.427273	7	0.363443	7	0.499611	7	0.510598	7	none	7	0.706878	7	0.75204	7	0.619554		7	0.5542	0.0543582
			8	0.453442	8	0.357827	8	0.448001	8	0.558846	8	none	8	0.976788	8	0.803996	8	0.52114		8	0.588577	0.0836395
			9	0.274721	9	0.203624	9	0.254156	9	0.257701	9	none	9	0.521513	9	0.368554	9	0.241423		9	0.303099	0.0411009
			10	0.1591	10	0.128599	10	0.151641	10	0.126946	10	none	10	0.207274	10	0.174373	10	0.140451		10	0.155483	0.0107239
			11	0.127588	11	0.109715	11	0.11308	11	0.0911677	11	none	11	0.130328	11	0.111327	11	0.119212		11	0.114631	0.00493602
			12	0.11216	12	0.10553	12	0.0913963	12	0.0781662	12	none	12	0.105824	12	0.0878641	12	0.110518		12	0.0987796	0.00490522
			13	0.0921014	13	0.0938003	13	0.07981	13	0.0683813	13	none	13	0.10221	13	0.0697657	13	0.097793		13	0.0862659	0.00514479
			14	0.0769881	14	0.0755936	14	0.0728798	14	0.0635078	14	none	14	0.0955429	14	0.064985	14	0.0849314		14	0.076347	0.00422328
			15	0.0609943	15	0.0599238	15	0.0591917	15	0.0528147	15	none	15	0.0758051	15	0.0574893	15	0.067675		15	0.0619849	0.00284818
			16	0.047257	16	0.0461215	16	0.0483083	16	0.042009	16	none	16	0.0536023	16	0.042906	16	0.0499123		16	0.0471595	0.00151276
			17	0.0342461	17	0.0312759	17	0.0365302	17	0.0282317	17	none	17	0.0377278	17	0.0275869	17	0.0328081		17	0.0326295	0.00146754
			18	0.0231988	18	0.0224145	18	0.0268565	18	0.0178661	18	none	18	0.0245186	18	0.0187164	18	0.0208951		18	0.0220666	0.00120118
			19	0.013615	19	0.0146958	19	0.0189612	19	0.0103243	19	none	19	0.0136855	19	0.0115318	19	0.0127023		19	0.0136451	0.00104368
			20	0.00731557	20	0.0082052	20	0.0130787	20	0.00577713	20	none	20	0.007324	20	0.00614867	20	0.00708815		20	0.0078482	0.000923237
			Delta	0.371044	Delta	0.365231	Delta	0.277891	Delta	0.295437	Delta	none	Delta	0.185672	Delta	0.275484	Delta	0.276773		Delta	0.292505	0.0237196
			Theta	0.459949	Theta	0.443574	Theta	0.542752	Theta	0.553364	Theta	none	Theta	0.658445	Theta	0.600089	Theta	0.546379		Theta	0.543507	0.0282366
			Alpha	0.129572	Alpha	0.146077	Alpha	0.130662	Alpha	0.113542	Alpha	none	Alpha	0.12073	Alpha	0.0954978	Alpha	0.137719		Alpha	0.124829	0.00632209
			Beta	0.0346474	Beta	0.0403219	Beta	0.0451072	Beta	0.0334203	Beta	none	Beta	0.0324162	Beta	0.026078	Beta	0.0353975		Beta	0.0353412	0.00228202
