# Supplementary material for: Dual orexin and MCH neuron-ablated mice display severe sleep attacks and cataplexy
Source: eLife. 2020 Apr 21;9:e54275. doi: 10.7554/eLife.54275 (PMC7173968; doi:10.7554/eLife.54275)
Supplement: Figure 4—source data 1. [file elife-54275-fig4-data1.xlsx]

## Sheet: FFT-0W 3Groups
OXMC DOX-			N1			N2			N3			N4			N5			N6			N7			N8
																													Dark period		light period
			Hz	Dark	Light	Hz	Dark	Light	Hz	Dark	Light	Hz	Dark	Light	Hz	Dark	Light	Hz	Dark	Light	Hz	Dark	Light	Hz	Dark	Light		Hz	AVE	SEM	AVE	SEM		one-way ANOVA				Dark period			Light period
Wake			0	0.0136334	0.0141689	0	0.0199197	0.0185231	0	0.0110703	0.016172	0	0.0113267	0.0127298	0	0.00901127	0.0100853	0	0.00726224	0.00831012	0	0.00733782	0.00746837	0	0.00872184	0.00856239		0	0.0110354	0.00148279	0.0120025	0.00143195						W	R	NR	W	R	NR
			1	0.0686552	0.0682398	1	0.100326	0.0917059	1	0.0615014	0.0763895	1	0.0542533	0.0671565	1	0.0450387	0.0521661	1	0.0367932	0.0423713	1	0.0383798	0.0366429	1	0.0447099	0.0449908		1	0.0562071	0.00742207	0.0599579	0.0067294		Delta	OXMC DOX- vs OXMC DOX +			0.95771	1	0.12015	1	1	0.16184
			2	0.0928647	0.0995859	2	0.121104	0.110469	2	0.0948457	0.117682	2	0.0712294	0.0746804	2	0.0644775	0.0776007	2	0.0575098	0.0704821	2	0.0602617	0.0625189	2	0.0809656	0.0857332		2	0.0804073	0.0076629	0.0873441	0.00702488			OXMC DOX- vs OX DOX -			0.45332	1	1	0.49721	1	1
			3	0.0995016	0.116939	3	0.10639	0.110612	3	0.112606	0.138402	3	0.0789855	0.0883064	3	0.0708438	0.0925811	3	0.0633343	0.0863763	3	0.0677896	0.0816494	3	0.106023	0.113993		3	0.0881841	0.00706211	0.103608	0.00691806			OXMC DOX+ vs OX DOX -			0.08087	1	0.17676	0.11747	1	0.21446
			4	0.10497	0.119451	4	0.0929764	0.11102	4	0.123938	0.131244	4	0.0968389	0.0994982	4	0.0784742	0.105052	4	0.0641757	0.0861159	4	0.0728033	0.0910471	4	0.109784	0.116332		4	0.0929949	0.00712966	0.10747	0.00533687
			5	0.10023	0.102357	5	0.0854329	0.106409	5	0.114035	0.109994	5	0.10445	0.102425	5	0.090442	0.102825	5	0.0715114	0.0946706	5	0.0712734	0.0836601	5	0.103668	0.104891		5	0.0926302	0.005568	0.100904	0.00290675		Theta	OXMC DOX- vs OXMC DOX +			0.60834	1	0.17606	0.74781	1	0.34419
			6	0.0828709	0.083755	6	0.0801364	0.0868198	6	0.0922874	0.0869194	6	0.103684	0.0969478	6	0.0935898	0.0940711	6	0.0873103	0.107566	6	0.073081	0.0810414	6	0.0890377	0.0917087		6	0.0877497	0.00329337	0.0911036	0.00300429			OXMC DOX- vs OX DOX -			0.60137	1	1	0.77188	1	1
			7	0.0739347	0.0718146	7	0.0699603	0.0674673	7	0.0760324	0.0679525	7	0.09243	0.0886162	7	0.0868021	0.0801273	7	0.110216	0.109973	7	0.0901198	0.0963276	7	0.0788941	0.0784315		7	0.0847987	0.00460305	0.0825887	0.00527338			OXMC DOX+ vs OX DOX -			0.06423	1	0.23091	0.11311	1	0.46595
			8	0.0773944	0.0648601	8	0.0664251	0.0618633	8	0.0754224	0.0566893	8	0.081243	0.0782044	8	0.0904881	0.0749406	8	0.141748	0.10317	8	0.123861	0.119365	8	0.0742847	0.0685939		8	0.0913584	0.00950638	0.0784608	0.00770892
			9	0.0696999	0.0559558	9	0.060342	0.0521992	9	0.0661795	0.0450973	9	0.0718329	0.067422	9	0.0955797	0.0723226	9	0.115755	0.0778847	9	0.131896	0.110446	9	0.0641029	0.0570583		9	0.0844234	0.0095063	0.0672982	0.00726218		Alpha	OXMC DOX- vs OXMC DOX +			1	1	0.27574	1	1	0.54399
			10	0.0555912	0.0444889	10	0.049489	0.0406707	10	0.0466554	0.0347109	10	0.057511	0.0555331	10	0.0833853	0.0629507	10	0.0679007	0.0512023	10	0.0899151	0.0699393	10	0.0521782	0.0485688		10	0.0628282	0.00569396	0.0510081	0.00410236			OXMC DOX- vs OX DOX -			0.61628	1	1	0.39701	1	1
			11	0.041641	0.0372095	11	0.0358812	0.0327805	11	0.0319631	0.0275813	11	0.0431277	0.0423275	11	0.0609828	0.0494813	11	0.0427157	0.037068	11	0.0509506	0.0424117	11	0.0443736	0.0444661		11	0.0439544	0.00314991	0.0391658	0.00245763			OXMC DOX+ vs OX DOX -			1	1	0.35836	1	1	0.44674
			12	0.0308978	0.0311418	12	0.0278801	0.0273891	12	0.0236528	0.022777	12	0.0331141	0.03144	12	0.0410588	0.0387705	12	0.0315242	0.0294208	12	0.0323478	0.0297538	12	0.0377539	0.0351605		12	0.0322787	0.00190863	0.0307317	0.00170101
			13	0.0234089	0.0246934	13	0.0226024	0.0223567	13	0.0184101	0.0184032	13	0.0268947	0.0257805	13	0.0272604	0.0266822	13	0.0255118	0.0245437	13	0.0241232	0.0226253	13	0.0277555	0.0275527		13	0.0244959	0.00109379	0.0240797	0.00103186		Beta	OXMC DOX- vs OXMC DOX +			0.87076	1	0.05074	0.39555	1	0.23653
			14	0.0182664	0.0191549	14	0.0175253	0.0170594	14	0.0146746	0.0147941	14	0.0214465	0.0204916	14	0.0190317	0.0186139	14	0.0203735	0.0197612	14	0.0182569	0.0180916	14	0.0223129	0.0222258		14	0.018986	0.00085378	0.0187741	0.000793451			OXMC DOX- vs OX DOX -			1	1	1	1	1	1
			15	0.0144598	0.0149024	15	0.0139588	0.0134907	15	0.0118491	0.0116495	15	0.01668	0.0160547	15	0.0140498	0.0138735	15	0.0172039	0.0159336	15	0.0146026	0.014458	15	0.0179329	0.0170883		15	0.0150921	0.000714374	0.0146813	0.000606652			OXMC DOX+ vs OX DOX -			0.19416	1	0.17571	0.35602	1	0.44844
			16	0.011835	0.0116991	16	0.0112135	0.0111452	16	0.00938148	0.00897718	16	0.0126623	0.0120438	16	0.0108702	0.0105808	16	0.0154149	0.0127848	16	0.0119666	0.0119781	16	0.0141185	0.0132845		16	0.0121828	0.000669503	0.0115617	0.000476294
			17	0.00868359	0.00865359	17	0.0079823	0.00789018	17	0.0067097	0.0064119	17	0.00947155	0.00869676	17	0.00793842	0.00744978	17	0.0101786	0.00946233	17	0.00856567	0.00849766	17	0.010243	0.00945871		17	0.0087216	0.000427478	0.00831511	0.000365207
			18	0.00581903	0.00558955	18	0.00528392	0.00524502	18	0.00453699	0.00425894	18	0.00659935	0.00594721	18	0.00544217	0.00501103	18	0.00678027	0.00636083	18	0.00604664	0.00590767	18	0.00670382	0.00597546		18	0.00590152	0.00027983	0.00553696	0.000238099
			19	0.00363529	0.00342151	19	0.00329697	0.00316095	19	0.0027726	0.00253396	19	0.00404008	0.00369557	19	0.00337436	0.00308534	19	0.00428056	0.00410376	19	0.00404409	0.00387781	19	0.00414307	0.0037383		19	0.00369838	0.000184202	0.00345215	0.000179795
			20	0.00200819	0.00191735	20	0.00187413	0.00172162	20	0.00147704	0.00135962	20	0.00217929	0.00200269	20	0.00185891	0.00172891	20	0.00249971	0.00243858	20	0.00237773	0.00229317	20	0.00229321	0.00218614		20	0.00207103	0.000117978	0.00195601	0.000124311
			Delta	0.46622	0.506574	Delta	0.506229	0.530217	Delta	0.506925	0.573712	Delta	0.405757	0.432066	Delta	0.349276	0.430225	Delta	0.293324	0.380016	Delta	0.310508	0.355518	Delta	0.44515	0.46594		Delta	0.410424	0.0299603	0.459284	0.0264041
			Theta	0.359491	0.320874	Theta	0.326353	0.30902	Theta	0.356577	0.291369	Theta	0.406701	0.386724	Theta	0.449845	0.384412	Theta	0.52293	0.449796	Theta	0.508873	0.477119	Theta	0.358497	0.344361		Theta	0.411158	0.0264478	0.370459	0.0236415
			Alpha	0.128674	0.127102	Alpha	0.117848	0.113076	Alpha	0.10055	0.095205	Alpha	0.141263	0.136094	Alpha	0.162384	0.147421	Alpha	0.137329	0.126727	Alpha	0.140281	0.12734	Alpha	0.150129	0.146493		Alpha	0.134807	0.00677708	0.127433	0.00609922
			Beta	0.0319811	0.031281	Beta	0.0296508	0.029163	Beta	0.0248778	0.0235416	Beta	0.0349525	0.032386	Beta	0.029484	0.0278559	Beta	0.039154	0.0351503	Beta	0.0330007	0.0325544	Beta	0.0375016	0.0346431		Beta	0.0325753	0.00164259	0.0308219	0.0013598
																													Dark period		light period
			Hz	Dark	Light	Hz	Dark	Light	Hz	Dark	Light	Hz	Dark	Light	Hz	Dark	Light	Hz	Dark	Light	Hz	Dark	Light	Hz	Dark	Light		Hz	AVE	SEM	AVE	SEM
REM			0	0.00698208	0.00724225	0	0.00670307	0.00624731	0	0.00657737	0.00731097	0	0.00490465	0.00564423	0	0.00577187	0.00746982	0	0.00342983	0.00357999	0	0.00300245	0.00365384	0	0.00560655	0.00531109		0	0.00537224	0.000528427	0.00580744	0.000553379
			1	0.0342288	0.0356062	1	0.0289366	0.0309957	1	0.030775	0.0384298	1	0.0242404	0.0253162	1	0.0321401	0.037254	1	0.0150382	0.0153434	1	0.0170766	0.0156012	1	0.0260804	0.027587		1	0.0260645	0.00246293	0.0282667	0.00322371
			2	0.0722997	0.0756373	2	0.0625333	0.0664161	2	0.0711233	0.0724264	2	0.0526331	0.0491136	2	0.0684074	0.072492	2	0.028963	0.0344841	2	0.0276278	0.0349962	2	0.0539658	0.0573101		2	0.0546942	0.00630877	0.0578595	0.00591834
			3	0.0844179	0.0975086	3	0.0793656	0.0890396	3	0.0919136	0.0898733	3	0.0754875	0.0665875	3	0.100181	0.101116	3	0.0481461	0.0610614	3	0.0568406	0.0591187	3	0.0712865	0.0696222		3	0.0759549	0.0061026	0.0792409	0.00599004
			4	0.0825476	0.0883654	4	0.067894	0.0786085	4	0.0798261	0.0798068	4	0.0710524	0.0700503	4	0.0997928	0.0897947	4	0.0594976	0.0656965	4	0.0832481	0.0593074	4	0.0623204	0.0676031		4	0.0757724	0.00467779	0.0749041	0.00388587
			5	0.0808356	0.0779626	5	0.0710534	0.0758177	5	0.0705739	0.0809651	5	0.0632117	0.0737891	5	0.0801649	0.0717787	5	0.0611461	0.0682609	5	0.0469099	0.045808	5	0.0684648	0.0796006		5	0.067795	0.00388049	0.0717479	0.00398885
			6	0.0790951	0.0916389	6	0.120583	0.109217	6	0.0895305	0.10432	6	0.0902524	0.105755	6	0.0745501	0.0862714	6	0.104299	0.10953	6	0.0640894	0.0857302	6	0.113347	0.123282		6	0.0919683	0.00692191	0.101968	0.00463029
			7	0.114083	0.114278	7	0.15319	0.13542	7	0.114893	0.125092	7	0.139593	0.147716	7	0.115158	0.111933	7	0.188448	0.172488	7	0.156701	0.177437	7	0.155112	0.146882		7	0.142147	0.00936461	0.141406	0.00870212
			8	0.116659	0.102584	8	0.125672	0.108188	8	0.112892	0.103834	8	0.133789	0.134859	8	0.126964	0.105162	8	0.181327	0.148807	8	0.211659	0.192694	8	0.128877	0.115088		8	0.14223	0.0124071	0.126402	0.0111448
			9	0.0746122	0.0693794	9	0.0716003	0.0686118	9	0.0849428	0.0692792	9	0.0918646	0.0842768	9	0.0750518	0.0707184	9	0.103148	0.0907841	9	0.121007	0.11514	9	0.0780129	0.0786495		9	0.0875298	0.00606067	0.0808549	0.00568354
			10	0.0568709	0.0490162	10	0.0419586	0.0496857	10	0.0665447	0.0505935	10	0.0621369	0.0527807	10	0.0452894	0.0494406	10	0.0587696	0.0624642	10	0.0669125	0.0648386	10	0.0570307	0.0533816		10	0.0569392	0.00322449	0.0540251	0.00218283
			11	0.0488584	0.0381437	11	0.0317571	0.0408413	11	0.0440496	0.0401992	11	0.0413925	0.0376208	11	0.0375848	0.0425366	11	0.0380964	0.0424423	11	0.0427106	0.0385719	11	0.0387449	0.0385676		11	0.0403993	0.00180208	0.0398654	0.00068399
			12	0.0376773	0.0350419	12	0.031843	0.0304433	12	0.0312205	0.0322994	12	0.0309044	0.0311647	12	0.0297755	0.033355	12	0.0294812	0.0334647	12	0.0250665	0.024809	12	0.0293073	0.030996		12	0.0306594	0.00124143	0.0314467	0.00109148
			13	0.0298554	0.0313395	13	0.0271332	0.0275864	13	0.029545	0.0276272	13	0.026622	0.0285249	13	0.0269223	0.0285384	13	0.0207075	0.0265892	13	0.0178	0.0202539	13	0.0256015	0.0264092		13	0.0255234	0.00148532	0.0271086	0.00111958
			14	0.0240093	0.0254472	14	0.0222245	0.0250365	14	0.0237296	0.0235079	14	0.0245176	0.0245927	14	0.0252427	0.0246965	14	0.0166782	0.0208952	14	0.0152357	0.016971	14	0.0244891	0.0236219		14	0.0220158	0.0013641	0.0230961	0.00100801
			15	0.0208043	0.0203948	15	0.0185227	0.019455	15	0.0182737	0.019458	15	0.0217174	0.0212349	15	0.02064	0.0225806	15	0.013501	0.0154738	15	0.0128038	0.0145568	15	0.0217853	0.0180182		15	0.018506	0.00125728	0.0188965	0.000974975
			16	0.0155058	0.0157623	16	0.0153181	0.016192	16	0.0130846	0.015158	16	0.0176896	0.0164356	16	0.0136422	0.0191239	16	0.0120537	0.0112458	16	0.0110129	0.0119409	16	0.0160977	0.0132704		16	0.0143006	0.000790253	0.0148911	0.000920438
			17	0.00944468	0.0113284	17	0.0111914	0.0109222	17	0.0100684	0.00953037	17	0.012536	0.0114431	17	0.00954562	0.0114353	17	0.00785308	0.00779617	17	0.00955137	0.00802022	17	0.0104616	0.0104466		17	0.0100815	0.000488083	0.0101153	0.000531976
			18	0.00589075	0.00721516	18	0.0069155	0.00597816	18	0.00574983	0.00545545	18	0.00821967	0.00713536	18	0.00674476	0.00699434	18	0.0049071	0.00482865	18	0.00573435	0.00536525	18	0.00685164	0.00748381		18	0.0063767	0.000359795	0.00630702	0.000360406
			19	0.00354987	0.00401846	19	0.00363403	0.00343768	19	0.00300266	0.00316105	19	0.00485374	0.00390457	19	0.00399625	0.00465021	19	0.00299736	0.00307421	19	0.00319065	0.00345211	19	0.00423623	0.00449907		19	0.0036826	0.000230307	0.00377467	0.000209268
			20	0.00177291	0.0020905	20	0.00197069	0.0018605	20	0.00168448	0.00167219	20	0.00238161	0.00205445	20	0.0024344	0.00265794	20	0.00151152	0.00169121	20	0.00182029	0.00173419	20	0.00232072	0.00237024		20	0.00198708	0.000123833	0.0020164	0.000124778
			Delta	0.35433	0.37508	Delta	0.309783	0.340878	Delta	0.344212	0.361501	Delta	0.286625	0.284857	Delta	0.380686	0.372435	Delta	0.212791	0.244846	Delta	0.231703	0.214831	Delta	0.282118	0.301723		Delta	0.300281	0.0208225	0.312019	0.0214266
			Theta	0.44132	0.426896	Theta	0.513004	0.471122	Theta	0.468802	0.453119	Theta	0.517636	0.525388	Theta	0.437013	0.423526	Theta	0.635992	0.584073	Theta	0.620368	0.63584	Theta	0.53238	0.517283		Theta	0.520814	0.0265347	0.504656	0.0268975
			Alpha	0.161205	0.150367	Alpha	0.13148	0.143362	Alpha	0.146818	0.143092	Alpha	0.145154	0.143138	Alpha	0.140165	0.151707	Alpha	0.118464	0.138865	Alpha	0.113617	0.115163	Alpha	0.139928	0.137613		Alpha	0.137104	0.00549039	0.140413	0.00400393
			Beta	0.036164	0.0404148	Beta	0.0390297	0.0383905	Beta	0.03359	0.0349771	Beta	0.0456806	0.0409731	Beta	0.0363632	0.0448617	Beta	0.0293227	0.028636	Beta	0.0313095	0.0305126	Beta	0.0399679	0.0380702		Beta	0.0364285	0.00184062	0.0371045	0.001929
																													Dark period		light period
			Hz	Dark	Light	Hz	Dark	Light	Hz	Dark	Light	Hz	Dark	Light	Hz	Dark	Light	Hz	Dark	Light	Hz	Dark	Light	Hz	Dark	Light		Hz	AVE	SEM	AVE	SEM
NREM			0	0.0148804	0.0133966	0	0.014494	0.0135653	0	0.0133927	0.01215	0	0.00985454	0.00981352	0	0.0121428	0.0120429	0	0.00827654	0.00726533	0	0.00878101	0.00874052	0	0.00808136	0.00765965		0	0.0112379	0.00100013	0.0105792	0.000895789
			1	0.0800693	0.0690639	1	0.0764928	0.0688129	1	0.0658561	0.0602417	1	0.0512139	0.0508534	1	0.0612813	0.0603073	1	0.0414784	0.0370782	1	0.0439629	0.0430249	1	0.0394425	0.0393296		1	0.0574747	0.00560571	0.053589	0.00454276
			2	0.145551	0.120394	2	0.133248	0.116694	2	0.125241	0.109853	2	0.103739	0.0995191	2	0.117589	0.107325	2	0.0828228	0.0738165	2	0.0960573	0.0808121	2	0.0855316	0.0825707		2	0.111223	0.00807682	0.098873	0.00625776
			3	0.160725	0.137161	3	0.15163	0.130655	3	0.167918	0.142003	3	0.134654	0.125388	3	0.149354	0.136795	3	0.112282	0.104172	3	0.128826	0.121379	3	0.116309	0.11405		3	0.140212	0.00721399	0.126451	0.00454782
			4	0.13449	0.115233	4	0.13593	0.116625	4	0.154074	0.129348	4	0.130302	0.120903	4	0.140105	0.122942	4	0.107198	0.0988216	4	0.145282	0.136001	4	0.115061	0.113269		4	0.132805	0.00542934	0.119143	0.0039527
			5	0.0900308	0.0868716	5	0.0969137	0.0963144	5	0.110772	0.103371	5	0.10769	0.104453	5	0.0964941	0.0914966	5	0.0902786	0.0848546	5	0.103783	0.091406	5	0.0996957	0.10085		5	0.0994573	0.00268239	0.0949522	0.00263751
			6	0.0630551	0.069115	6	0.0674749	0.0763732	6	0.0737231	0.0808107	6	0.0841964	0.0879368	6	0.0708868	0.0764447	6	0.0825301	0.0844848	6	0.0692728	0.0693404	6	0.0857151	0.0872032		6	0.0746068	0.00300449	0.0789636	0.00262189
			7	0.0509962	0.057509	7	0.052538	0.0600949	7	0.0546489	0.0633797	7	0.0666253	0.0720714	7	0.0580417	0.06205	7	0.0800321	0.0839599	7	0.0628313	0.0697527	7	0.0718347	0.0766299		7	0.0621935	0.00359559	0.0681809	0.00321237
			8	0.0435419	0.0499358	8	0.0463736	0.0518334	8	0.0426925	0.0538986	8	0.0558985	0.057814	8	0.0493526	0.0518793	8	0.0746338	0.0775207	8	0.0619936	0.0700997	8	0.0628224	0.0651921		8	0.0546636	0.00397438	0.0597717	0.00356434
			9	0.0378628	0.046788	9	0.0399671	0.0460975	9	0.0375633	0.0492106	9	0.0487175	0.052325	9	0.0427762	0.0499358	9	0.0632765	0.0687492	9	0.0576963	0.0611041	9	0.0569099	0.0590511		9	0.0480962	0.0035625	0.0541577	0.00283488
			10	0.0366992	0.0461482	10	0.0385172	0.0451517	10	0.0345895	0.0463303	10	0.0438448	0.0489458	10	0.0429539	0.0490594	10	0.056078	0.0618925	10	0.0492627	0.0539475	10	0.0541805	0.0560306		10	0.0445157	0.00282882	0.0509383	0.00207083
			11	0.0332878	0.0448237	11	0.0367631	0.0425365	11	0.0304436	0.0390975	11	0.0400696	0.0433276	11	0.0402218	0.046545	11	0.0477358	0.0536072	11	0.0416795	0.0465869	11	0.0503033	0.0501732		11	0.0400631	0.00237434	0.0458372	0.0016029
			12	0.0285244	0.0387836	12	0.0292476	0.0354532	12	0.023951	0.0300713	12	0.0341674	0.0355484	12	0.0321302	0.038175	12	0.0398642	0.0442899	12	0.0335842	0.0392711	12	0.0417581	0.0409216		12	0.0329034	0.00207968	0.0378143	0.00149669
			13	0.0239196	0.0310223	13	0.0229207	0.0294013	13	0.0193504	0.0242397	13	0.0267393	0.027723	13	0.0252933	0.029113	13	0.0331855	0.0357152	13	0.0273708	0.0323881	13	0.0328326	0.0322173		13	0.0264515	0.00167778	0.0302275	0.00122056
			14	0.0188356	0.0254462	14	0.0187559	0.023384	14	0.0151617	0.0191819	14	0.0205463	0.0214031	14	0.019935	0.0225455	14	0.025541	0.0271048	14	0.021939	0.0245702	14	0.0264162	0.0248647		14	0.0208913	0.00130856	0.0235626	0.000883642
			15	0.0138903	0.0187724	15	0.0146119	0.0177215	15	0.0112254	0.0142517	15	0.0154595	0.0157484	15	0.0159909	0.0167067	15	0.0196257	0.0202123	15	0.01705	0.0185119	15	0.019843	0.0183097		15	0.0159621	0.00102183	0.0175293	0.000667431
			16	0.0101963	0.0125708	16	0.0105092	0.0129721	16	0.00827439	0.00968074	16	0.0108361	0.0107393	16	0.0109806	0.0117541	16	0.0147528	0.0147573	16	0.013062	0.0136782	16	0.0136836	0.0129263		16	0.0115369	0.000750882	0.0123849	0.000573087
			17	0.00652699	0.00810665	17	0.00667738	0.00792921	17	0.00526594	0.0061246	17	0.00708924	0.00711895	17	0.00691964	0.0071434	17	0.00939832	0.00996448	17	0.00819114	0.00886504	17	0.0089222	0.00854076		17	0.00737386	0.0004836	0.00797414	0.000421267
			18	0.00370893	0.00496497	18	0.00378401	0.00458223	18	0.00315063	0.00363175	18	0.00447258	0.00448284	18	0.00409021	0.0041609	18	0.00577306	0.00626918	18	0.00482747	0.00555417	18	0.00571234	0.0053968		18	0.0044399	0.000335322	0.00488036	0.000298217
			19	0.00211726	0.00262454	19	0.00210949	0.00252349	19	0.00181546	0.00208761	19	0.00255326	0.00256545	19	0.00230858	0.00236343	19	0.00340911	0.00354916	19	0.00298008	0.00328841	19	0.0032599	0.00315064		19	0.00256914	0.000207159	0.00276909	0.000178057
			20	0.00109086	0.00126935	20	0.001042	0.00128009	20	0.000890415	0.00103612	20	0.00133128	0.00132049	20	0.00115246	0.00121491	20	0.00182768	0.00191475	20	0.00156694	0.00167789	20	0.00168501	0.00166209		20	0.00132333	0.000119103	0.00142196	0.000104494
			Delta	0.610866	0.528723	Delta	0.594214	0.529101	Delta	0.623861	0.544817	Delta	0.527598	0.501116	Delta	0.564823	0.518866	Delta	0.43406	0.398743	Delta	0.517911	0.472623	Delta	0.45604	0.45007		Delta	0.541172	0.0248256	0.493007	0.0174958
			Theta	0.232155	0.269496	Theta	0.244871	0.279551	Theta	0.243217	0.29363	Theta	0.299283	0.319093	Theta	0.264011	0.289369	Theta	0.356551	0.376607	Theta	0.301057	0.324244	Theta	0.331463	0.344107		Theta	0.284076	0.0159924	0.312012	0.0127576
			Alpha	0.118458	0.158848	Alpha	0.122299	0.148496	Alpha	0.100132	0.126842	Alpha	0.136982	0.143751	Alpha	0.133571	0.153085	Alpha	0.165952	0.180929	Alpha	0.141623	0.161328	Alpha	0.171153	0.166486		Alpha	0.136271	0.00840146	0.154971	0.00570793
			Beta	0.0236403	0.0295363	Beta	0.0241221	0.0292871	Beta	0.0193968	0.0225608	Beta	0.0262824	0.0262271	Beta	0.0254515	0.0266367	Beta	0.0351609	0.0364549	Beta	0.0306277	0.0330638	Beta	0.033263	0.0316766		Beta	0.0272431	0.00188417	0.0294304	0.0015404
OXMC DOX+			N1			N2			N3			N4			N5			N6			N7
																													Dark period		light period
			Hz	Dark	Light	Hz	Dark	Light	Hz	Dark	Light	Hz	Dark	Light	Hz	Dark	Light	Hz	Dark	Light	Hz	Dark	Light					Hz	AVE	SEM	AVE	SEM
Wake			0	0.00959568	0.0101585	0	0.00957152	0.00877336	0	0.00870339	0.00892684	0	0.00826186	0.00913352	0	0.00937974	0.00997446	0	0.0121209	0.0157197	0	0.00933389	0.00936629					0	0.0095667	0.000464493	0.0102932	0.000925143
			1	0.0475256	0.050114	1	0.0485561	0.0434024	1	0.0440953	0.0475727	1	0.0422705	0.0462234	1	0.0473832	0.0492991	1	0.0639849	0.0862369	1	0.0489611	0.0482501					1	0.0489681	0.00266757	0.0530141	0.00559925
			2	0.0659275	0.0735932	2	0.076343	0.0859262	2	0.0878005	0.0906349	2	0.0660213	0.0797653	2	0.073755	0.0856603	2	0.0667059	0.0813358	2	0.0710927	0.0747396					2	0.0725208	0.00297277	0.081665	0.0023473
			3	0.0741184	0.0899047	3	0.0982036	0.122614	3	0.0997452	0.0999812	3	0.0721645	0.0990995	3	0.0799022	0.103129	3	0.0678956	0.0852051	3	0.0726836	0.0857749					3	0.0806733	0.00491381	0.0979583	0.00491828
			4	0.0813746	0.0993386	4	0.112817	0.126731	4	0.0948069	0.103436	4	0.0732892	0.101886	4	0.0799448	0.0958375	4	0.0679074	0.0804696	4	0.0763898	0.0956936					4	0.08379	0.00577734	0.100485	0.00522355
			5	0.0832554	0.0926914	5	0.122094	0.114267	5	0.105057	0.12137	5	0.0738373	0.0933407	5	0.0766309	0.0891345	5	0.0688733	0.0784675	5	0.087319	0.0984077					5	0.0881525	0.007191	0.0982398	0.00560723
			6	0.0800104	0.0842194	6	0.111508	0.101126	6	0.112986	0.11887	6	0.0756901	0.0865631	6	0.0776968	0.0935954	6	0.0773936	0.0881465	6	0.0976004	0.0987335					6	0.0904121	0.00629126	0.0958935	0.00450403
			7	0.0844223	0.0841667	7	0.0907275	0.0864659	7	0.111139	0.104412	7	0.0853916	0.0831441	7	0.0932005	0.0972568	7	0.0901467	0.0989343	7	0.106326	0.103383					7	0.0944791	0.00389168	0.0939661	0.00345962
			8	0.0944533	0.0866964	8	0.0816471	0.0718437	8	0.0938274	0.0806354	8	0.116185	0.0827252	8	0.129088	0.0999786	8	0.111699	0.101872	8	0.114505	0.110083					8	0.105915	0.00620313	0.0905477	0.00517069
			9	0.0984123	0.0829414	9	0.0655927	0.0541338	9	0.062367	0.0531787	9	0.106967	0.0728628	9	0.111549	0.0792381	9	0.115496	0.0814167	9	0.0957231	0.0757053					9	0.0937295	0.00811775	0.0713538	0.00474535
			10	0.080858	0.0650421	10	0.0450418	0.0409047	10	0.04215	0.0385375	10	0.0813384	0.0591263	10	0.0680225	0.0502973	10	0.0818855	0.0545203	10	0.0615958	0.047062					10	0.0658417	0.00643605	0.0507843	0.00361385
			11	0.0550663	0.046932	11	0.0322398	0.0318552	11	0.034036	0.0318958	11	0.0563361	0.0467066	11	0.0357632	0.0318613	11	0.0516206	0.0361634	11	0.0407465	0.0347312					11	0.0436869	0.00392806	0.0371637	0.00257021
			12	0.03894	0.0341647	12	0.0250693	0.0259812	12	0.0265167	0.0245324	12	0.038659	0.0353582	12	0.0229842	0.0229514	12	0.0353456	0.0275585	12	0.0295397	0.027014					12	0.0310078	0.00249879	0.0282229	0.00178988
			13	0.0295533	0.0262197	13	0.0197433	0.0210109	13	0.0197559	0.019166	13	0.027121	0.0278637	13	0.0172789	0.0174339	13	0.0247129	0.0210366	13	0.0226032	0.0222415					13	0.0229669	0.00166815	0.0221389	0.00140492
			14	0.0225931	0.02174	14	0.0160762	0.0177601	14	0.0157179	0.0160906	14	0.0204215	0.0223264	14	0.013775	0.0137178	14	0.0179084	0.0171596	14	0.0181566	0.0184226					14	0.017807	0.00112854	0.0181739	0.0011487
			15	0.0178968	0.0171285	15	0.0133477	0.014685	15	0.0128696	0.0132262	15	0.0170922	0.017518	15	0.0130851	0.0123102	15	0.0140841	0.0140334	15	0.0147368	0.0156171					15	0.0147303	0.000757563	0.0149312	0.000734095
			16	0.0132935	0.0131955	16	0.011034	0.0117104	16	0.0101221	0.0101336	16	0.0164296	0.0136036	16	0.0149378	0.0123374	16	0.0113631	0.0116425	16	0.0122116	0.0136938					16	0.0127702	0.000854717	0.012331	0.000485795
			17	0.00962471	0.00940749	17	0.0083819	0.00838427	17	0.00750838	0.00723505	17	0.0101065	0.00996714	17	0.0105774	0.0104151	17	0.00857923	0.00832762	17	0.00864641	0.0091835					17	0.00906064	0.000407841	0.00898859	0.000410658
			18	0.00665835	0.00631777	18	0.0060354	0.00611248	18	0.00534481	0.00505255	18	0.00622094	0.00656824	18	0.00896114	0.0091946	18	0.00608988	0.00578275	18	0.0058436	0.00602431					18	0.00645059	0.000444341	0.0064361	0.000494159
			19	0.00413317	0.00388026	19	0.00380896	0.00404152	19	0.00347317	0.00325235	19	0.00398369	0.00399491	19	0.0083875	0.00848102	19	0.00393035	0.00375378	19	0.00378556	0.00374334					19	0.00450034	0.00065248	0.0044496	0.000679043
			20	0.00228717	0.00214765	20	0.00216096	0.00227179	20	0.00197804	0.00186011	20	0.00221271	0.00222297	20	0.00769758	0.00789612	20	0.00225769	0.00221762	20	0.00219906	0.00212997					20	0.00297046	0.000788761	0.00296375	0.000823636
			Delta	0.352202	0.405642	Delta	0.458014	0.49294	Delta	0.431505	0.462995	Delta	0.327583	0.420315	Delta	0.357616	0.423061	Delta	0.335367	0.411715	Delta	0.356446	0.402866					Delta	0.374105	0.0189385	0.431362	0.0127643
			Theta	0.438156	0.403066	Theta	0.394517	0.354474	Theta	0.422469	0.395634	Theta	0.465572	0.384421	Theta	0.479556	0.420366	Theta	0.47662	0.42489	Theta	0.475751	0.434966					Theta	0.450377	0.0124053	0.402545	0.0104145
			Alpha	0.16405	0.146185	Alpha	0.106476	0.111292	Alpha	0.108896	0.104911	Alpha	0.15963	0.149773	Alpha	0.102886	0.0982746	Alpha	0.143672	0.115951	Alpha	0.125783	0.118026					Alpha	0.130199	0.0097292	0.120631	0.00750408
			Beta	0.0359969	0.0349487	Beta	0.0314212	0.0325204	Beta	0.0284265	0.0275337	Beta	0.0389534	0.0363569	Beta	0.0505614	0.0483243	Beta	0.0322202	0.0317243	Beta	0.0326862	0.0347749					Beta	0.0357523	0.00277711	0.035169	0.00244878
																													Dark period		light period
			Hz	Dark	Light	Hz	Dark	Light	Hz	Dark	Light	Hz	Dark	Light	Hz	Dark	Light	Hz	Dark	Light	Hz	Dark	Light					Hz	AVE	SEM	AVE	SEM
REM			0	0.00500029	0.00572274	0	0.00515523	0.00539911	0	0.00343233	0.00299597	0	0.00563996	0.00576405	0	0.00497628	0.00482633	0	0.00532115	0.00934848	0	0.00489015	0.00549327					0	0.00491649	0.000265391	0.00564999	0.000715589
			1	0.0255676	0.028338	1	0.024435	0.0266962	1	0.0129761	0.01471	1	0.0221804	0.0282116	1	0.0212447	0.0247601	1	0.0225305	0.0403833	1	0.0261297	0.0271336					1	0.022152	0.0016752	0.0271761	0.00283819
			2	0.0586929	0.0600047	2	0.0531974	0.0644457	2	0.0299234	0.032973	2	0.0459565	0.0554738	2	0.0364406	0.0542795	2	0.0428308	0.0504357	2	0.0532533	0.0562925					2	0.0457564	0.00385756	0.053415	0.00379573
			3	0.0776062	0.0770115	3	0.0982009	0.108537	3	0.0425392	0.0390116	3	0.0688904	0.0702392	3	0.0695138	0.080131	3	0.0574724	0.0645335	3	0.0710203	0.0711662					3	0.0693205	0.00647975	0.0729471	0.00781886
			4	0.0660916	0.0784641	4	0.0990182	0.0928271	4	0.0469344	0.0521354	4	0.0553528	0.0645739	4	0.0757775	0.0690958	4	0.0585299	0.0572219	4	0.0751364	0.0684532					4	0.0681201	0.00649263	0.0689673	0.00511842
			5	0.0637441	0.0781278	5	0.0706749	0.0697007	5	0.0975031	0.122119	5	0.052436	0.0623052	5	0.0559658	0.0684275	5	0.0552365	0.0575118	5	0.0648973	0.0703312					5	0.0657797	0.0058162	0.0755033	0.00814781
			6	0.0804117	0.0956726	6	0.0823161	0.0953437	6	0.192857	0.211801	6	0.081704	0.09146	6	0.0737063	0.102989	6	0.113052	0.106376	6	0.0847223	0.10498					6	0.101253	0.0159893	0.115517	0.0161846
			7	0.129149	0.122356	7	0.134979	0.122317	7	0.189625	0.179037	7	0.14585	0.136413	7	0.143609	0.1543	7	0.184097	0.173954	7	0.133627	0.155565					7	0.151562	0.00938871	0.149135	0.00869629
			8	0.136725	0.102317	8	0.120027	0.112339	8	0.12045	0.0934286	8	0.160236	0.121185	8	0.190195	0.15107	8	0.155998	0.142632	8	0.143369	0.148424					8	0.146714	0.00935108	0.124485	0.00876069
			9	0.0843305	0.0716788	9	0.0698157	0.0721175	9	0.0663263	0.0551158	9	0.0997729	0.0862823	9	0.119995	0.0987869	9	0.0894556	0.0808804	9	0.100759	0.0848754					9	0.0900651	0.00708998	0.0785339	0.00523839
			10	0.0601561	0.0573014	10	0.0528097	0.0499224	10	0.04287	0.0439467	10	0.0609982	0.062369	10	0.0627116	0.0534521	10	0.0589714	0.055845	10	0.063623	0.0516054					10	0.0574486	0.00276942	0.0534917	0.00221609
			11	0.045766	0.0458492	11	0.0451816	0.0410643	11	0.0349244	0.0358115	11	0.0430127	0.0459945	11	0.0394607	0.0327998	11	0.0394755	0.045614	11	0.0450627	0.0383633					11	0.0418405	0.00152299	0.0407852	0.00201509
			12	0.0375085	0.0391715	12	0.0353427	0.0309202	12	0.0293053	0.0299562	12	0.0342272	0.0370887	12	0.0254872	0.024094	12	0.030861	0.0314748	12	0.0352856	0.0288453					12	0.0325739	0.00158822	0.0316501	0.00191824
			13	0.0318148	0.0350291	13	0.0283328	0.0273725	13	0.0265175	0.025547	13	0.0297928	0.0337335	13	0.0156345	0.016624	13	0.0245442	0.0233401	13	0.0253938	0.0229937					13	0.0260043	0.00197507	0.0263771	0.00242235
			14	0.0282523	0.0315726	14	0.0225908	0.0248448	14	0.0210894	0.0209718	14	0.0251699	0.0288489	14	0.0125579	0.013329	14	0.0196309	0.017861	14	0.0211216	0.0175964					14	0.0214876	0.00185174	0.0221463	0.00248448
			15	0.0239072	0.0253253	15	0.018672	0.0190798	15	0.0145307	0.0143675	15	0.0232218	0.0233461	15	0.0117134	0.0114625	15	0.0152378	0.0148458	15	0.0168432	0.0151521					15	0.0177323	0.00170878	0.0176542	0.00193072
			16	0.0189578	0.0181837	16	0.0154028	0.0142683	16	0.0109928	0.0101676	16	0.0192017	0.0187865	16	0.0121802	0.010501	16	0.0110867	0.010948	16	0.0129693	0.0131589					16	0.0143987	0.00133093	0.0137163	0.0013529
			17	0.011521	0.0125483	17	0.0104362	0.0097561	17	0.00818013	0.00716127	17	0.0116862	0.0124075	17	0.00990262	0.00887342	17	0.00659519	0.00747723	17	0.00925147	0.00889098					17	0.00965327	0.00068972	0.00958783	0.000817697
			18	0.0073732	0.00804277	18	0.00684221	0.00651885	18	0.00470431	0.00462369	18	0.00781683	0.00809006	18	0.00768805	0.00792449	18	0.00450836	0.0047933	18	0.00656587	0.00534291					18	0.00649983	0.000516871	0.00647658	0.000591736
			19	0.00487305	0.00472748	19	0.00423316	0.0041796	19	0.00287477	0.00266904	19	0.0045717	0.00490693	19	0.00613133	0.00640997	19	0.00289963	0.00296346	19	0.0039185	0.0034169					19	0.00421459	0.000432249	0.00418191	0.000491504
			20	0.00255104	0.00255539	20	0.00233662	0.00235033	20	0.00144438	0.00145128	20	0.00228181	0.00252038	20	0.00510872	0.00586324	20	0.00166497	0.00156067	20	0.00215995	0.00191961					20	0.00250678	0.000457978	0.00260299	0.000568667
			Delta	0.291702	0.321946	Delta	0.345526	0.362206	Delta	0.229876	0.260949	Delta	0.244816	0.280804	Delta	0.258942	0.296694	Delta	0.2366	0.270086	Delta	0.290437	0.293377					Delta	0.271129	0.0154811	0.298009	0.0130627
			Theta	0.490772	0.449326	Theta	0.459947	0.45204	Theta	0.612128	0.583328	Theta	0.548561	0.497709	Theta	0.590217	0.560598	Theta	0.601574	0.559687	Theta	0.526101	0.54545					Theta	0.547043	0.0219667	0.521163	0.0206918
			Alpha	0.167249	0.176948	Alpha	0.15012	0.143282	Alpha	0.126367	0.126654	Alpha	0.155424	0.169012	Alpha	0.104854	0.0983093	Alpha	0.12975	0.133136	Alpha	0.143707	0.122951					Alpha	0.139639	0.00790093	0.138613	0.0103027
			Beta	0.0452761	0.0460576	Beta	0.039251	0.0370732	Beta	0.0281964	0.0260729	Beta	0.0455583	0.0467114	Beta	0.0410109	0.0395722	Beta	0.0267548	0.0277426	Beta	0.0348651	0.0327293					Beta	0.0372732	0.00288426	0.0365656	0.00310526
																													Dark period		light period
			Hz	Dark	Light	Hz	Dark	Light	Hz	Dark	Light	Hz	Dark	Light	Hz	Dark	Light	Hz	Dark	Light	Hz	Dark	Light					Hz	AVE	SEM	AVE	SEM
NREM			0	0.0104585	0.010287	0	0.00718584	0.00692236	0	0.00737074	0.0077568	0	0.00957375	0.00847005	0	0.00939821	0.0096953	0	0.00896379	0.0110803	0	0.00891389	0.00977912					0	0.00883782	0.000446822	0.00914156	0.000557999
			1	0.0555411	0.053419	1	0.0356118	0.0335865	1	0.0394894	0.0417237	1	0.0478442	0.0436356	1	0.0479831	0.0482499	1	0.0441802	0.0586457	1	0.0462376	0.0495762					1	0.0452696	0.00243146	0.0469767	0.00310185
			2	0.107819	0.0959774	2	0.085218	0.0771088	2	0.0876763	0.0852588	2	0.105138	0.0830067	2	0.0968015	0.0991575	2	0.0831403	0.0802978	2	0.0864352	0.0855739					2	0.0931755	0.00381225	0.0866259	0.00305188
			3	0.125708	0.110449	3	0.137506	0.112428	3	0.0974643	0.0912356	3	0.129579	0.107718	3	0.135535	0.142068	3	0.116517	0.113864	3	0.116488	0.110344					3	0.122685	0.00524175	0.112587	0.00569041
			4	0.113628	0.101114	4	0.117218	0.100234	4	0.0925398	0.0930601	4	0.120956	0.105025	4	0.14149	0.120925	4	0.118316	0.109868	4	0.117516	0.10391					4	0.117381	0.00540312	0.104876	0.00330499
			5	0.0870791	0.0874318	5	0.0868235	0.0905736	5	0.0989918	0.104377	5	0.0968149	0.0906171	5	0.0992258	0.0894291	5	0.0909887	0.0848332	5	0.0997912	0.0871017					5	0.094245	0.00219163	0.0906234	0.00242361
			6	0.0718617	0.0751489	6	0.0764496	0.0836148	6	0.100053	0.104057	6	0.072203	0.0794084	6	0.0757279	0.0782433	6	0.0786154	0.077792	6	0.0825257	0.0796924					6	0.0796338	0.00367547	0.0825652	0.00370867
			7	0.0625741	0.0645195	7	0.0730269	0.0781134	7	0.0872555	0.0901451	7	0.0621647	0.0677348	7	0.0690887	0.0733016	7	0.0767527	0.0800466	7	0.0740085	0.0762631					7	0.0721244	0.00328907	0.075732	0.00319184
			8	0.0543072	0.057124	8	0.067948	0.073606	8	0.0752011	0.0738051	8	0.0579335	0.0621593	8	0.0671687	0.0668257	8	0.0772532	0.077043	8	0.0661817	0.072997					8	0.0665705	0.00314719	0.06908	0.0027494
			9	0.0513156	0.0543935	9	0.0611026	0.067251	9	0.0650067	0.064712	9	0.0527807	0.0612648	9	0.0519607	0.0548795	9	0.066658	0.0660582	9	0.0554732	0.0612866					9	0.0577568	0.00243021	0.0614065	0.00194288
			10	0.0516089	0.0559797	10	0.0534383	0.0596	10	0.0582046	0.0600137	10	0.0532774	0.0621177	10	0.0415562	0.0453816	10	0.055974	0.0570229	10	0.0498425	0.0546596					10	0.051986	0.0020229	0.0563965	0.00207588
			11	0.0490634	0.0550432	11	0.046846	0.0519437	11	0.0503408	0.0507904	11	0.050354	0.060424	11	0.0340578	0.0378392	11	0.0456875	0.048997	11	0.0445554	0.0518215					11	0.0458435	0.00214103	0.0509799	0.00260029
			12	0.041388	0.0480487	12	0.0397429	0.0445269	12	0.0403279	0.0392904	12	0.0411825	0.050823	12	0.02697	0.0296675	12	0.0374147	0.0384899	12	0.0393979	0.0437315					12	0.0380605	0.00191482	0.0420826	0.00265258
			13	0.0353078	0.0403225	13	0.0321339	0.0363138	13	0.0308418	0.0292076	13	0.0304643	0.0386202	13	0.0228607	0.024013	13	0.0309044	0.0295455	13	0.032538	0.0342927					13	0.0307215	0.00144943	0.0331879	0.00220763
			14	0.0273754	0.0313525	14	0.0254725	0.0281475	14	0.0230615	0.0217543	14	0.0230888	0.0275082	14	0.0195879	0.0197377	14	0.0227204	0.0220975	14	0.0262465	0.0261642					14	0.0239361	0.000992772	0.0252517	0.00157446
			15	0.0205558	0.022804	15	0.0194505	0.0208504	15	0.0169885	0.0155532	15	0.016971	0.0200428	15	0.0153528	0.0159155	15	0.0170054	0.0162507	15	0.019285	0.0193934					15	0.0179442	0.000695986	0.0186871	0.00106239
			16	0.014512	0.0158884	16	0.0140588	0.0142507	16	0.0118455	0.0107724	16	0.0130184	0.0140053	16	0.0137888	0.0130366	16	0.0119588	0.0116798	16	0.0141869	0.0143784					16	0.0133385	0.000409809	0.0134302	0.000658795
			17	0.00961727	0.00992991	17	0.00969306	0.00949873	17	0.00773534	0.00739717	17	0.00817248	0.00842169	17	0.0108376	0.0104452	17	0.00769614	0.00759443	17	0.00934342	0.00893891					17	0.00901362	0.000445587	0.00888943	0.000436416
			18	0.00561715	0.00582976	18	0.00597133	0.00599591	18	0.00496148	0.00480387	18	0.00475052	0.004869	18	0.00815935	0.00832142	18	0.00493805	0.00458316	18	0.00590719	0.00534475					18	0.00575787	0.000441207	0.00567827	0.000484033
			19	0.00305949	0.00325144	19	0.0033721	0.00352884	19	0.00302603	0.0028325	19	0.00249848	0.00273873	19	0.00657162	0.00695814	19	0.00285679	0.00274003	19	0.0034003	0.00313283					19	0.00354069	0.000518354	0.0035975	0.00057097
			20	0.00160247	0.00168571	20	0.00172975	0.00190495	20	0.00161742	0.00145337	20	0.00123413	0.00138884	20	0.00587744	0.00590886	20	0.00145942	0.00147019	20	0.00172592	0.00161904					20	0.00217808	0.000619982	0.00220442	0.000620917
			Delta	0.489775	0.448391	Delta	0.462378	0.413931	Delta	0.416162	0.415655	Delta	0.500332	0.430003	Delta	0.521036	0.49983	Delta	0.453141	0.447509	Delta	0.466468	0.436505					Delta	0.472756	0.0130164	0.441689	0.0109879
			Theta	0.291667	0.307166	Theta	0.331965	0.362185	Theta	0.385721	0.392733	Theta	0.298359	0.332685	Theta	0.305502	0.318632	Theta	0.355253	0.357963	Theta	0.328032	0.344899					Theta	0.328072	0.0127195	0.34518	0.0109326
			Alpha	0.17369	0.197571	Alpha	0.163646	0.181782	Alpha	0.16156	0.156596	Alpha	0.162061	0.197418	Alpha	0.118829	0.127173	Alpha	0.153732	0.155381	Alpha	0.162023	0.175403					Alpha	0.156506	0.00665538	0.170189	0.00964517
			Beta	0.0344084	0.0365853	Beta	0.0348251	0.0351791	Beta	0.0291858	0.0272593	Beta	0.029674	0.0314235	Beta	0.0452348	0.0446702	Beta	0.0289092	0.0280676	Beta	0.0345638	0.0334139					Beta	0.0338287	0.00215466	0.0337998	0.00223211
OX DOX-			N1			N2			N3			N4			N5			N6
																													Dark period		light period
			Hz	Dark	Light	Hz	Dark	Light	Hz	Dark	Light	Hz	Dark	Light	Hz	Dark	Light	Hz	Dark	Light								Hz	AVE	SEM	AVE	SEM
Wake			0	0.0170641	0.0145351	0	0.0151028	0.0124831	0	0.00996089	0.0124058	0	0.01473	0.0134153	0	0.00863748	0.00944994	0	0.0223432	0.0179016								0	0.0146398	0.00202783	0.0133651	0.00113985
			1	0.0846328	0.0702521	1	0.0792285	0.066514	1	0.0505622	0.0627789	1	0.0750502	0.0679334	1	0.0433497	0.0486672	1	0.113417	0.0892134								1	0.0743734	0.0103007	0.0675599	0.00534523
			2	0.0957166	0.101857	2	0.0999484	0.0941267	2	0.086987	0.124772	2	0.0993613	0.106291	2	0.0668775	0.0766355	2	0.135718	0.114572								2	0.0974348	0.00916786	0.103042	0.00681637
			3	0.0889697	0.113265	3	0.0908115	0.106879	3	0.115641	0.163887	3	0.0967744	0.121219	3	0.0810114	0.0919377	3	0.115204	0.116413								3	0.0980687	0.00586086	0.118933	0.00989723
			4	0.0912432	0.108242	4	0.0886779	0.118478	4	0.135136	0.149286	4	0.0930458	0.117164	4	0.0907305	0.0945985	4	0.103696	0.111238								4	0.100422	0.00727158	0.116501	0.00742708
			5	0.0869221	0.0988077	5	0.0931761	0.110176	5	0.124686	0.10847	5	0.0872586	0.098608	5	0.0938613	0.0948125	5	0.08769	0.0944242								5	0.0955989	0.00595071	0.100883	0.0027807
			6	0.0785212	0.0898365	6	0.086807	0.0926922	6	0.0976639	0.0860515	6	0.0794575	0.0816958	6	0.0959107	0.0990259	6	0.0717058	0.0781307								6	0.085011	0.00421153	0.0879054	0.00309757
			7	0.075896	0.078181	7	0.0794459	0.0795534	7	0.0799109	0.067554	7	0.0749806	0.0729477	7	0.101811	0.108432	7	0.065885	0.0737783								7	0.0796548	0.00488732	0.0800743	0.00593067
			8	0.0818606	0.0694182	8	0.0816067	0.0659754	8	0.0729242	0.0535804	8	0.0795295	0.0651163	8	0.10832	0.106835	8	0.0605471	0.082386								8	0.080798	0.00641082	0.0738853	0.00759312
			9	0.0741161	0.0534823	9	0.0707394	0.0526082	9	0.0640403	0.0405467	9	0.0791474	0.0559733	9	0.0893076	0.070844	9	0.0514902	0.0555694								9	0.0714735	0.00528852	0.0548373	0.00395418
			10	0.0561699	0.0432406	10	0.0526468	0.0430058	10	0.0473016	0.030419	10	0.0616867	0.0441377	10	0.0593288	0.0471392	10	0.0413143	0.0372047								10	0.0530747	0.0031341	0.0408578	0.00246859
			11	0.044372	0.0357743	11	0.0411499	0.0344515	11	0.0308283	0.0232511	11	0.0417942	0.0343916	11	0.0410674	0.0335968	11	0.0309146	0.0283493								11	0.0383544	0.00241669	0.0316358	0.0019799
			12	0.0323536	0.028738	12	0.0303868	0.0278118	12	0.0212642	0.0183325	12	0.0298938	0.0280968	12	0.03019	0.027358	12	0.0247449	0.0235662								12	0.0281389	0.00172128	0.0256505	0.00164318
			13	0.0237795	0.024197	13	0.0229532	0.0245797	13	0.0161958	0.0156167	13	0.0232277	0.0239106	13	0.0234382	0.022217	13	0.0200307	0.0198295								13	0.0216042	0.00121488	0.0217251	0.00141638
			14	0.0191433	0.0200404	14	0.0191435	0.0207037	14	0.0133558	0.0126498	14	0.018499	0.0204114	14	0.0187999	0.0183287	14	0.0165939	0.0166218								14	0.0175892	0.000931614	0.018126	0.0012626
			15	0.015993	0.0160792	15	0.0154742	0.0164997	15	0.0108857	0.0102246	15	0.0148087	0.0164526	15	0.014872	0.0157476	15	0.0130383	0.0131895								15	0.0141787	0.000774428	0.0146989	0.00102666
			16	0.0122862	0.0125871	16	0.012181	0.0126353	16	0.00863933	0.00771328	16	0.0115745	0.012446	16	0.0115292	0.0130515	16	0.00991305	0.011335								16	0.0110206	0.00058909	0.011628	0.000817331
			17	0.00904136	0.00918627	17	0.00881977	0.00902272	17	0.00625576	0.00549257	17	0.00838312	0.00873372	17	0.00875479	0.00918119	17	0.00698608	0.00738731								17	0.00804015	0.000466679	0.0081673	0.000602257
			18	0.00602233	0.00624796	18	0.00599763	0.00602491	18	0.00408698	0.00363421	18	0.00557601	0.00570839	18	0.00611597	0.00607053	18	0.00449656	0.00455317								18	0.00538258	0.000357139	0.00537319	0.000427594
			19	0.00376461	0.00393511	19	0.00370095	0.00370043	19	0.00239252	0.00217766	19	0.00338696	0.00347769	19	0.00388801	0.00380422	19	0.00272907	0.00276523								19	0.00331035	0.000250251	0.00331006	0.000282521
			20	0.0021317	0.00209786	20	0.00200223	0.00207856	20	0.00128277	0.0011552	20	0.00183395	0.00186929	20	0.00219868	0.00226718	20	0.00154137	0.00157138								20	0.00183178	0.000145988	0.00183991	0.000168113
			Delta	0.447484	0.492423	Delta	0.451842	0.496174	Delta	0.513011	0.609195	Delta	0.45149	0.511216	Delta	0.37583	0.406651	Delta	0.555726	0.525861								Delta	0.465897	0.025262	0.50692	0.0265938
			Theta	0.366564	0.334159	Theta	0.371246	0.333835	Theta	0.361841	0.278152	Theta	0.374802	0.319871	Theta	0.454678	0.432276	Theta	0.290943	0.327069								Theta	0.370012	0.0212316	0.33756	0.0207757
			Alpha	0.135641	0.124829	Alpha	0.129108	0.124046	Alpha	0.0925298	0.0800746	Alpha	0.128223	0.123263	Alpha	0.128367	0.117248	Alpha	0.105322	0.101556								Alpha	0.119865	0.00691659	0.111836	0.00728522
			Beta	0.0332462	0.0340543	Beta	0.0327016	0.033462	Beta	0.0226574	0.0201729	Beta	0.0307546	0.0322351	Beta	0.0324867	0.0343746	Beta	0.0256661	0.0276121								Beta	0.0295854	0.00179122	0.0303185	0.00226731
																													Dark period		light period
			Hz	Dark	Light	Hz	Dark	Light	Hz	Dark	Light	Hz	Dark	Light	Hz	Dark	Light	Hz	Dark	Light								Hz	AVE	SEM	AVE	SEM
REM			0	0.00476449	0.00635454	0	0.00479032	0.00579942	0	0.0059011	0.0070357	0	0.00687096	0.00781636	0	0.00458791	0.00452614	0	0.00447148	0.00479472								0	0.00523104	0.000389048	0.00605448	0.000521054
			1	0.0265063	0.0302754	1	0.0218351	0.0268	1	0.03057	0.0352256	1	0.0325902	0.0392671	1	0.0219408	0.0227904	1	0.0206975	0.0224575								1	0.02569	0.00204887	0.0294693	0.00277296
			2	0.0541193	0.0600394	2	0.0450099	0.0511655	2	0.0826121	0.0768752	2	0.0684621	0.0734925	2	0.0426831	0.0444623	2	0.0406729	0.0412824								2	0.0555932	0.00682909	0.0578862	0.0060823
			3	0.0730831	0.0776422	3	0.0617957	0.0681811	3	0.157783	0.0942502	3	0.089845	0.0887233	3	0.055339	0.0578157	3	0.0507317	0.0521361								3	0.0814296	0.0163084	0.0731248	0.00685404
			4	0.0741843	0.0759477	4	0.0645933	0.0664591	4	0.132688	0.0791072	4	0.0758491	0.0797382	4	0.0567371	0.0574287	4	0.048217	0.0497755								4	0.0753782	0.0122306	0.0680761	0.00506802
			5	0.0752136	0.0798992	5	0.0608331	0.0722651	5	0.0755567	0.0788772	5	0.0682294	0.0776524	5	0.057369	0.0663968	5	0.0488433	0.0560518								5	0.0643408	0.00432133	0.0718571	0.00377417
			6	0.103463	0.116208	6	0.0765775	0.11715	6	0.0721704	0.112007	6	0.0812648	0.0927153	6	0.0928418	0.109078	6	0.0862708	0.0949214								6	0.0854314	0.0046632	0.107013	0.00434789
			7	0.162081	0.144884	7	0.165612	0.170044	7	0.107753	0.137907	7	0.112351	0.106081	7	0.168677	0.171656	7	0.166444	0.15947								7	0.147153	0.0117792	0.14834	0.0100751
			8	0.126787	0.109955	8	0.174636	0.131275	8	0.111086	0.117725	8	0.106147	0.0921534	8	0.181385	0.16629	8	0.170644	0.197753								8	0.145114	0.0139655	0.135859	0.0160083
			9	0.0712958	0.0663502	9	0.0967689	0.0734857	9	0.0675499	0.0718154	9	0.0783022	0.0681092	9	0.103173	0.095493	9	0.120547	0.105631								9	0.0896063	0.00845036	0.0801474	0.0066683
			10	0.0504892	0.0501497	10	0.0603377	0.0470485	10	0.0355929	0.0425801	10	0.0600562	0.0563437	10	0.0595861	0.056991	10	0.0699295	0.0542986								10	0.0559986	0.00479229	0.0512353	0.00232543
			11	0.0406891	0.0377401	11	0.0372474	0.0358257	11	0.0228959	0.0302546	11	0.0442779	0.0494951	11	0.0411308	0.0371151	11	0.0462545	0.0386233								11	0.0387492	0.00341523	0.0381757	0.00256847
			12	0.0297822	0.0302169	12	0.0244638	0.0305673	12	0.0214788	0.0261513	12	0.04007	0.0411344	12	0.030406	0.0266447	12	0.0322216	0.0301252								12	0.0297371	0.00264196	0.0308066	0.00221002
			13	0.0207291	0.027215	13	0.0232705	0.0252034	13	0.0198189	0.02267	13	0.037555	0.0340029	13	0.02434	0.0209842	13	0.0259895	0.0228872								13	0.0252838	0.00262447	0.0254938	0.00191969
			14	0.0240659	0.0238989	14	0.0230172	0.0228744	14	0.0171611	0.0197324	14	0.0316901	0.0285845	14	0.0192658	0.0176267	14	0.0196481	0.0176478								14	0.0224747	0.00211558	0.0217275	0.00173676
			15	0.0225497	0.0202323	15	0.0198987	0.0193182	15	0.0142904	0.0161466	15	0.0240882	0.0231603	15	0.0128396	0.0140253	15	0.0151162	0.0166144								15	0.0181305	0.00191465	0.0182495	0.00134324
			16	0.0164793	0.0161274	16	0.0157726	0.0147921	16	0.0099527	0.0118499	16	0.017227	0.0167234	16	0.00974373	0.0115786	16	0.0125329	0.0167711								16	0.013618	0.00135985	0.0146404	0.00097082
			17	0.00964518	0.0118983	17	0.0100704	0.00928302	17	0.00661296	0.00890701	17	0.0116339	0.0112933	17	0.00730964	0.00802483	17	0.00880387	0.00880243								17	0.00901265	0.000754812	0.00970149	0.000626787
			18	0.00706649	0.00788109	18	0.00680552	0.00634703	18	0.00437094	0.00573415	18	0.00731697	0.00723101	18	0.0053243	0.00552236	18	0.00599657	0.00504321								18	0.0061468	0.000465539	0.00629314	0.000442454
			19	0.00448227	0.00466	19	0.00418801	0.00396524	19	0.00269774	0.0033349	19	0.00414113	0.00415207	19	0.00341734	0.00358411	19	0.00385982	0.00318136								19	0.00379772	0.000264409	0.00381295	0.000226237
			20	0.00252335	0.00242495	20	0.00247678	0.00215086	20	0.00145698	0.00181381	20	0.0020315	0.00213067	20	0.00190252	0.00196567	20	0.00210773	0.00173164								20	0.00208314	0.000160905	0.00203627	0.000103342
			Delta	0.303107	0.323804	Delta	0.254067	0.284871	Delta	0.47921	0.364335	Delta	0.334976	0.358873	Delta	0.234069	0.248894	Delta	0.209162	0.221703								Delta	0.302432	0.0400091	0.300413	0.0239038
			Theta	0.514116	0.487547	Theta	0.573932	0.539003	Theta	0.394153	0.482034	Theta	0.438122	0.415402	Theta	0.605663	0.599508	Theta	0.613835	0.612074								Theta	0.523304	0.0372213	0.522595	0.0308519
			Alpha	0.137816	0.139303	Alpha	0.127898	0.133789	Alpha	0.095645	0.114955	Alpha	0.177681	0.176377	Alpha	0.127982	0.116396	Alpha	0.13923	0.125898								Alpha	0.134375	0.0107915	0.134453	0.00923947
			Beta	0.0401966	0.0429917	Beta	0.0393133	0.0365383	Beta	0.0250913	0.0316397	Beta	0.0423505	0.0415305	Beta	0.0276975	0.0306756	Beta	0.0333009	0.0355298								Beta	0.0346583	0.00290593	0.0364843	0.00204887
																													Dark period		light period
			Hz	Dark	Light	Hz	Dark	Light	Hz	Dark	Light	Hz	Dark	Light	Hz	Dark	Light	Hz	Dark	Light								Hz	AVE	SEM	AVE	SEM
NREM			0	0.0123556	0.014045	0	0.01153	0.0112	0	0.0118561	0.0135938	0	0.0130286	0.0121757	0	0.00917936	0.00835345	0	0.00916401	0.00869067								0	0.0111856	0.000669467	0.0113431	0.000984097
			1	0.0645878	0.0734249	1	0.0601391	0.0572452	1	0.0613957	0.0721075	1	0.0689816	0.0647165	1	0.0471602	0.0439104	1	0.0481987	0.0435962								1	0.0584105	0.00361782	0.0591668	0.0054174
			2	0.128027	0.124589	2	0.110701	0.100514	2	0.129451	0.136687	2	0.128919	0.115949	2	0.0922028	0.0860478	2	0.0900104	0.0798179								2	0.113219	0.00756287	0.107267	0.00911095
			3	0.156253	0.131171	3	0.133975	0.120107	3	0.184356	0.152177	3	0.14654	0.128054	3	0.120124	0.109978	3	0.116283	0.105867								3	0.142922	0.0103554	0.124559	0.00683244
			4	0.143389	0.113979	4	0.127472	0.109852	4	0.156049	0.123618	4	0.126349	0.110193	4	0.117098	0.104301	4	0.111957	0.10129								4	0.130386	0.00675432	0.110539	0.00320385
			5	0.101297	0.093572	5	0.0987075	0.0942649	5	0.09322	0.0970974	5	0.0926572	0.0872727	5	0.0943208	0.0918004	5	0.0887849	0.0843742								5	0.0948312	0.00183457	0.0913969	0.00193169
			6	0.0724981	0.0772321	6	0.0779575	0.0822298	6	0.0661905	0.0751167	6	0.0674739	0.0700232	6	0.0817054	0.0871256	6	0.0757112	0.0766836								6	0.0735894	0.00246837	0.0780685	0.00241802
			7	0.0558157	0.0631745	7	0.0657942	0.0720079	7	0.0558215	0.0592305	7	0.0525177	0.0566135	7	0.0770658	0.0859467	7	0.0726642	0.0804709								7	0.0632799	0.00412959	0.069574	0.0048602
			8	0.0466428	0.0506072	8	0.0574391	0.0597508	8	0.0456968	0.0486721	8	0.0436478	0.0485991	8	0.0699129	0.0812743	8	0.0701088	0.0942123								8	0.0555747	0.00496623	0.0638527	0.00791751
			9	0.0409275	0.0446774	9	0.0478439	0.0530842	9	0.0365648	0.0412988	9	0.0414472	0.04774	9	0.0607778	0.0645943	9	0.061003	0.0675683								9	0.048094	0.00430521	0.0531605	0.00439836
			10	0.0352121	0.0447838	10	0.0430918	0.0513386	10	0.0314113	0.0359763	10	0.0430851	0.0503733	10	0.0532393	0.0542281	10	0.0554399	0.0550228								10	0.0435799	0.0038839	0.0486205	0.00292968
			11	0.0326114	0.0409924	11	0.0397351	0.0476404	11	0.0278981	0.0318853	11	0.0408794	0.0503783	11	0.0448025	0.0464429	11	0.0486952	0.0493962								11	0.0391036	0.00313974	0.0444559	0.00284949
			12	0.0277705	0.033926	12	0.0336725	0.0385585	12	0.0238634	0.0274949	12	0.0350758	0.0437307	12	0.0351328	0.0384063	12	0.0404538	0.0414219								12	0.0326615	0.00241527	0.0372564	0.0023711
			13	0.022733	0.0277801	13	0.0262878	0.0301726	13	0.0206449	0.0234459	13	0.0302273	0.0350901	13	0.0283121	0.0290159	13	0.0331466	0.0335011								13	0.026892	0.00190569	0.0298343	0.0017018
			14	0.0184641	0.022082	14	0.0205418	0.0240327	14	0.0167323	0.0188455	14	0.0241481	0.027752	14	0.0225956	0.0222293	14	0.0264064	0.0250427								14	0.0214814	0.00147365	0.0233307	0.00123641
			15	0.0146186	0.0165216	15	0.0158249	0.0177236	15	0.0132424	0.0149882	15	0.0176776	0.020423	15	0.0171578	0.0165898	15	0.0198397	0.019178								15	0.0163935	0.000957644	0.0175707	0.000805707
			16	0.011078	0.0113932	16	0.0116766	0.0123098	16	0.00977569	0.0109549	16	0.0120258	0.0135299	16	0.0119049	0.012238	16	0.0136681	0.0154004								16	0.0116882	0.000519969	0.0126377	0.000660206
			17	0.00740127	0.0075172	17	0.00805021	0.00823163	17	0.00690813	0.00741793	17	0.00743585	0.00845776	17	0.00797285	0.00803385	17	0.00861504	0.00907676								17	0.00773056	0.000245958	0.00812252	0.000252031
			18	0.00455366	0.00466185	18	0.00525052	0.00519556	18	0.00467651	0.0049024	18	0.00430476	0.00490767	18	0.00496669	0.00500157	18	0.00523699	0.00508606								18	0.00483152	0.000156732	0.00495919	7.48448e-05
			19	0.00250993	0.00259861	19	0.00287298	0.00296835	19	0.00278225	0.00295404	19	0.00238166	0.0026801	19	0.00286582	0.00292955	19	0.00304081	0.00280985								19	0.00274224	0.000101176	0.00282342	6.34019e-05
			20	0.00125496	0.00127113	20	0.00143649	0.00157259	20	0.00146383	0.0015361	20	0.00119591	0.00134088	20	0.00150271	0.00155242	20	0.00157275	0.00149306								20	0.00140444	6.01019e-05	0.00146103	5.0976e-05
			Delta	0.593553	0.536736	Delta	0.530994	0.481983	Delta	0.624471	0.581687	Delta	0.563448	0.506185	Delta	0.470906	0.436038	Delta	0.455234	0.414945								Delta	0.539768	0.0274428	0.492929	0.0254365
			Theta	0.251096	0.280475	Theta	0.292127	0.318411	Theta	0.235685	0.260295	Theta	0.248172	0.273349	Theta	0.342701	0.373169	Theta	0.334927	0.373958								Theta	0.284118	0.018979	0.313276	0.0206341
			Alpha	0.116198	0.141302	Alpha	0.136062	0.158128	Alpha	0.102381	0.11666	Alpha	0.148008	0.177374	Alpha	0.148001	0.152684	Alpha	0.168542	0.16854								Alpha	0.136532	0.00977726	0.152448	0.0087894
			Beta	0.0267978	0.027442	Beta	0.0292868	0.0302779	Beta	0.0256064	0.0277654	Beta	0.0273439	0.0309163	Beta	0.029213	0.0297554	Beta	0.0321337	0.0338661								Beta	0.0283969	0.000946467	0.0300039	0.000956735

## Sheet: FFT-OXMC DOX- 0-4w
			N1			N2			N3			N4			N5			N6			N7			N8				0W									N1			N2			N3			N4			N5
			Stage	W (%)		Stage	W (%)		Stage	W (%)		Stage	W (%)		Stage	W (%)		Stage	W (%)		Stage	W (%)		Stage	W (%)			Stage	Dark period		light period						Stage	W (%)		Stage	W (%)		Stage	W (%)		Stage	W (%)
			Hz	Dark	Light	Hz	Dark	Light	Hz	Dark	Light	Hz	Dark	Light	Hz	Dark	Light	Hz	Dark	Light	Hz	Dark	Light	Hz	Dark	Light		Hz	AVE	SEM	AVE	SEM					Hz	Dark	Light	Hz	Dark	Light	Hz	Dark	Light	Hz	Dark	Light
Wake			0	0.0136334	0.0141689	0	0.0199197	0.0185231	0	0.0110703	0.016172	0	0.0113267	0.0127298	0	0.00901127	0.0100853	0	0.00726224	0.00831012	0	0.00733782	0.00746837	0	0.00872184	0.00856239		0	0.0110354	0.00148279	0.0120025	0.00143195					0	0.0154594	0.0144391	0	0.0237396	0.0220515	0	0.0118556	0.010012	0	0.00838673	0.00883704
			1	0.0686552	0.0682398	1	0.100326	0.0917059	1	0.0615014	0.0763895	1	0.0542533	0.0671565	1	0.0450387	0.0521661	1	0.0367932	0.0423713	1	0.0383798	0.0366429	1	0.0447099	0.0449908		1	0.0562071	0.00742207	0.0599579	0.0067294					1	0.0774155	0.072671	1	0.118043	0.101913	1	0.057595	0.0510663	1	0.0410607	0.0438429
			2	0.0928647	0.0995859	2	0.121104	0.110469	2	0.0948457	0.117682	2	0.0712294	0.0746804	2	0.0644775	0.0776007	2	0.0575098	0.0704821	2	0.0602617	0.0625189	2	0.0809656	0.0857332		2	0.0804073	0.0076629	0.0873441	0.00702488					2	0.104742	0.101654	2	0.130679	0.113247	2	0.0901432	0.101907	2	0.0639219	0.0749922
			3	0.0995016	0.116939	3	0.10639	0.110612	3	0.112606	0.138402	3	0.0789855	0.0883064	3	0.0708438	0.0925811	3	0.0633343	0.0863763	3	0.0677896	0.0816494	3	0.106023	0.113993		3	0.0881841	0.00706211	0.103608	0.00691806					3	0.105637	0.115581	3	0.110378	0.110331	3	0.117462	0.141699	3	0.0773372	0.0985081
			4	0.10497	0.119451	4	0.0929764	0.11102	4	0.123938	0.131244	4	0.0968389	0.0994982	4	0.0784742	0.105052	4	0.0641757	0.0861159	4	0.0728033	0.0910471	4	0.109784	0.116332		4	0.0929949	0.00712966	0.10747	0.00533687					4	0.105497	0.130492	4	0.0975585	0.114068	4	0.127643	0.142353	4	0.0908223	0.116433
			5	0.10023	0.102357	5	0.0854329	0.106409	5	0.114035	0.109994	5	0.10445	0.102425	5	0.090442	0.102825	5	0.0715114	0.0946706	5	0.0712734	0.0836601	5	0.103668	0.104891		5	0.0926302	0.005568	0.100904	0.00290675					5	0.106515	0.11823	5	0.087621	0.104557	5	0.112148	0.11489	5	0.105786	0.11989
			6	0.0828709	0.083755	6	0.0801364	0.0868198	6	0.0922874	0.0869194	6	0.103684	0.0969478	6	0.0935898	0.0940711	6	0.0873103	0.107566	6	0.073081	0.0810414	6	0.0890377	0.0917087		6	0.0877497	0.00329337	0.0911036	0.00300429					6	0.0893219	0.0902739	6	0.0795184	0.0856162	6	0.0932492	0.0935271	6	0.111268	0.106227
			7	0.0739347	0.0718146	7	0.0699603	0.0674673	7	0.0760324	0.0679525	7	0.09243	0.0886162	7	0.0868021	0.0801273	7	0.110216	0.109973	7	0.0901198	0.0963276	7	0.0788941	0.0784315		7	0.0847987	0.00460305	0.0825887	0.00527338					7	0.071313	0.0700621	7	0.0666578	0.0688276	7	0.080704	0.0768264	7	0.100996	0.0862424
			8	0.0773944	0.0648601	8	0.0664251	0.0618633	8	0.0754224	0.0566893	8	0.081243	0.0782044	8	0.0904881	0.0749406	8	0.141748	0.10317	8	0.123861	0.119365	8	0.0742847	0.0685939		8	0.0913584	0.00950638	0.0784608	0.00770892					8	0.069871	0.061266	8	0.0653108	0.0630186	8	0.0778321	0.0639111	8	0.0926382	0.0758935
			9	0.0696999	0.0559558	9	0.060342	0.0521992	9	0.0661795	0.0450973	9	0.0718329	0.067422	9	0.0955797	0.0723226	9	0.115755	0.0778847	9	0.131896	0.110446	9	0.0641029	0.0570583		9	0.0844234	0.0095063	0.0672982	0.00726218					9	0.0609996	0.0491476	9	0.0524228	0.0484336	9	0.0648468	0.0468777	9	0.0734261	0.0600793
			10	0.0555912	0.0444889	10	0.049489	0.0406707	10	0.0466554	0.0347109	10	0.057511	0.0555331	10	0.0833853	0.0629507	10	0.0679007	0.0512023	10	0.0899151	0.0699393	10	0.0521782	0.0485688		10	0.0628282	0.00569396	0.0510081	0.00410236					10	0.0475504	0.037022	10	0.0403159	0.0346533	10	0.0443214	0.0345995	10	0.0570193	0.0476766
			11	0.041641	0.0372095	11	0.0358812	0.0327805	11	0.0319631	0.0275813	11	0.0431277	0.0423275	11	0.0609828	0.0494813	11	0.0427157	0.037068	11	0.0509506	0.0424117	11	0.0443736	0.0444661		11	0.0439544	0.00314991	0.0391658	0.00245763					11	0.0343565	0.0291196	11	0.0279089	0.0269441	11	0.0283459	0.025543	11	0.0450532	0.0397581
			12	0.0308978	0.0311418	12	0.0278801	0.0273891	12	0.0236528	0.022777	12	0.0331141	0.03144	12	0.0410588	0.0387705	12	0.0315242	0.0294208	12	0.0323478	0.0297538	12	0.0377539	0.0351605		12	0.0322787	0.00190863	0.0307317	0.00170101					12	0.0251327	0.0239738	12	0.0214236	0.0213043	12	0.019725	0.0194349	12	0.0347459	0.0323131
			13	0.0234089	0.0246934	13	0.0226024	0.0223567	13	0.0184101	0.0184032	13	0.0268947	0.0257805	13	0.0272604	0.0266822	13	0.0255118	0.0245437	13	0.0241232	0.0226253	13	0.0277555	0.0275527		13	0.0244959	0.00109379	0.0240797	0.00103186					13	0.018293	0.0179452	13	0.0165327	0.0166864	13	0.0151109	0.0155902	13	0.0273951	0.0253815
			14	0.0182664	0.0191549	14	0.0175253	0.0170594	14	0.0146746	0.0147941	14	0.0214465	0.0204916	14	0.0190317	0.0186139	14	0.0203735	0.0197612	14	0.0182569	0.0180916	14	0.0223129	0.0222258		14	0.018986	0.00085378	0.0187741	0.000793451					14	0.0141684	0.0142985	14	0.0124116	0.0132692	14	0.0120975	0.0128927	14	0.0217264	0.0193057
			15	0.0144598	0.0149024	15	0.0139588	0.0134907	15	0.0118491	0.0116495	15	0.01668	0.0160547	15	0.0140498	0.0138735	15	0.0172039	0.0159336	15	0.0146026	0.014458	15	0.0179329	0.0170883		15	0.0150921	0.000714374	0.0146813	0.000606652					15	0.0121043	0.0124752	15	0.0108355	0.0118321	15	0.0103116	0.0109563	15	0.0163777	0.0147588
			16	0.011835	0.0116991	16	0.0112135	0.0111452	16	0.00938148	0.00897718	16	0.0126623	0.0120438	16	0.0108702	0.0105808	16	0.0154149	0.0127848	16	0.0119666	0.0119781	16	0.0141185	0.0132845		16	0.0121828	0.000669503	0.0115617	0.000476294					16	0.011083	0.0108536	16	0.010682	0.0115511	16	0.00928221	0.00987389	16	0.0127925	0.0118322
			17	0.00868359	0.00865359	17	0.0079823	0.00789018	17	0.0067097	0.0064119	17	0.00947155	0.00869676	17	0.00793842	0.00744978	17	0.0101786	0.00946233	17	0.00856567	0.00849766	17	0.010243	0.00945871		17	0.0087216	0.000427478	0.00831511	0.000365207					17	0.0090692	0.00905189	17	0.00838663	0.00965414	17	0.00802897	0.00855192	17	0.00854969	0.00804404
			18	0.00581903	0.00558955	18	0.00528392	0.00524502	18	0.00453699	0.00425894	18	0.00659935	0.00594721	18	0.00544217	0.00501103	18	0.00678027	0.00636083	18	0.00604664	0.00590767	18	0.00670382	0.00597546		18	0.00590152	0.00027983	0.00553696	0.000238099					18	0.0078034	0.00803932	18	0.00723436	0.0080829	18	0.00714887	0.00737089	18	0.00548833	0.00516873
			19	0.00363529	0.00342151	19	0.00329697	0.00316095	19	0.0027726	0.00253396	19	0.00404008	0.00369557	19	0.00337436	0.00308534	19	0.00428056	0.00410376	19	0.00404409	0.00387781	19	0.00414307	0.0037383		19	0.00369838	0.000184202	0.00345215	0.000179795					19	0.0069871	0.00716728	19	0.00651505	0.0072909	19	0.00644119	0.00651119	19	0.00334654	0.00310922
			20	0.00200819	0.00191735	20	0.00187413	0.00172162	20	0.00147704	0.00135962	20	0.00217929	0.00200269	20	0.00185891	0.00172891	20	0.00249971	0.00243858	20	0.00237773	0.00229317	20	0.00229321	0.00218614		20	0.00207103	0.000117978	0.00195601	0.000124311					20	0.00668143	0.00623759	20	0.00582551	0.00666816	20	0.00570777	0.00560639	20	0.00186242	0.00170579
			Delta	0.46622	0.506574	Delta	0.506229	0.530217	Delta	0.506925	0.573712	Delta	0.405757	0.432066	Delta	0.349276	0.430225	Delta	0.293324	0.380016	Delta	0.310508	0.355518	Delta	0.44515	0.46594		Delta	0.410424	0.0299603	0.459284	0.0264041					Delta	0.499806	0.538627	Delta	0.544279	0.544116	Delta	0.504991	0.551915	Delta	0.378928	0.453667
			Theta	0.359491	0.320874	Theta	0.326353	0.30902	Theta	0.356577	0.291369	Theta	0.406701	0.386724	Theta	0.449845	0.384412	Theta	0.52293	0.449796	Theta	0.508873	0.477119	Theta	0.358497	0.344361		Theta	0.411158	0.0264478	0.370459	0.0236415					Theta	0.339056	0.307772	Theta	0.304226	0.300549	Theta	0.360953	0.315742	Theta	0.435348	0.376119
			Alpha	0.128674	0.127102	Alpha	0.117848	0.113076	Alpha	0.10055	0.095205	Alpha	0.141263	0.136094	Alpha	0.162384	0.147421	Alpha	0.137329	0.126727	Alpha	0.140281	0.12734	Alpha	0.150129	0.146493		Alpha	0.134807	0.00677708	0.127433	0.00609922					Alpha	0.104055	0.0978123	Alpha	0.0891123	0.0900361	Alpha	0.0855908	0.0844171	Alpha	0.145298	0.131517
			Beta	0.0319811	0.031281	Beta	0.0296508	0.029163	Beta	0.0248778	0.0235416	Beta	0.0349525	0.032386	Beta	0.029484	0.0278559	Beta	0.039154	0.0351503	Beta	0.0330007	0.0325544	Beta	0.0375016	0.0346431		Beta	0.0325753	0.00164259	0.0308219	0.0013598					Beta	0.0416241	0.0413497	Beta	0.0386436	0.0432472	Beta	0.036609	0.0379143	Beta	0.0320395	0.0298599
			Stage	R (%)		Stage	R (%)		Stage	R (%)		Stage	R (%)		Stage	R (%)		Stage	R (%)		Stage	R (%)		Stage	R (%)			Stage	Dark period		light period						Stage	R (%)		Stage	R (%)		Stage	R (%)		Stage	R (%)
			Hz	Dark	Light	Hz	Dark	Light	Hz	Dark	Light	Hz	Dark	Light	Hz	Dark	Light	Hz	Dark	Light	Hz	Dark	Light	Hz	Dark	Light		Hz	AVE	SEM	AVE	SEM					Hz	Dark	Light	Hz	Dark	Light	Hz	Dark	Light	Hz	Dark	Light
REM			0	0.00698208	0.00724225	0	0.00670307	0.00624731	0	0.00657737	0.00731097	0	0.00490465	0.00564423	0	0.00577187	0.00746982	0	0.00342983	0.00357999	0	0.00300245	0.00365384	0	0.00560655	0.00531109		0	0.00537224	0.000528427	0.00580744	0.000553379					0	0.00663198	0.00673976	0	0.00507279	0.00916627	0	0.0060411	0.00699198	0	0.00445348	0.00503338
			1	0.0342288	0.0356062	1	0.0289366	0.0309957	1	0.030775	0.0384298	1	0.0242404	0.0253162	1	0.0321401	0.037254	1	0.0150382	0.0153434	1	0.0170766	0.0156012	1	0.0260804	0.027587		1	0.0260645	0.00246293	0.0282667	0.00322371					1	0.0366681	0.0354562	1	0.0307827	0.0489527	1	0.0234785	0.031965	1	0.0203967	0.0254435
			2	0.0722997	0.0756373	2	0.0625333	0.0664161	2	0.0711233	0.0724264	2	0.0526331	0.0491136	2	0.0684074	0.072492	2	0.028963	0.0344841	2	0.0276278	0.0349962	2	0.0539658	0.0573101		2	0.0546942	0.00630877	0.0578595	0.00591834					2	0.0751084	0.0795256	2	0.0651649	0.0752866	2	0.0506648	0.0606905	2	0.0438167	0.0505923
			3	0.0844179	0.0975086	3	0.0793656	0.0890396	3	0.0919136	0.0898733	3	0.0754875	0.0665875	3	0.100181	0.101116	3	0.0481461	0.0610614	3	0.0568406	0.0591187	3	0.0712865	0.0696222		3	0.0759549	0.0061026	0.0792409	0.00599004					3	0.0897441	0.101453	3	0.087147	0.0934977	3	0.0722823	0.0828956	3	0.0690833	0.0718384
			4	0.0825476	0.0883654	4	0.067894	0.0786085	4	0.0798261	0.0798068	4	0.0710524	0.0700503	4	0.0997928	0.0897947	4	0.0594976	0.0656965	4	0.0832481	0.0593074	4	0.0623204	0.0676031		4	0.0757724	0.00467779	0.0749041	0.00388587					4	0.079867	0.0953691	4	0.0833881	0.088991	4	0.0697411	0.0761542	4	0.0712859	0.0753683
			5	0.0808356	0.0779626	5	0.0710534	0.0758177	5	0.0705739	0.0809651	5	0.0632117	0.0737891	5	0.0801649	0.0717787	5	0.0611461	0.0682609	5	0.0469099	0.045808	5	0.0684648	0.0796006		5	0.067795	0.00388049	0.0717479	0.00398885					5	0.0722962	0.087715	5	0.0880294	0.0874528	5	0.0671633	0.0768027	5	0.0615522	0.0739972
			6	0.0790951	0.0916389	6	0.120583	0.109217	6	0.0895305	0.10432	6	0.0902524	0.105755	6	0.0745501	0.0862714	6	0.104299	0.10953	6	0.0640894	0.0857302	6	0.113347	0.123282		6	0.0919683	0.00692191	0.101968	0.00463029					6	0.0827115	0.0946733	6	0.110649	0.101211	6	0.0985495	0.104113	6	0.0717264	0.0971616
			7	0.114083	0.114278	7	0.15319	0.13542	7	0.114893	0.125092	7	0.139593	0.147716	7	0.115158	0.111933	7	0.188448	0.172488	7	0.156701	0.177437	7	0.155112	0.146882		7	0.142147	0.00936461	0.141406	0.00870212					7	0.121553	0.109696	7	0.14018	0.125157	7	0.170939	0.139486	7	0.133405	0.145018
			8	0.116659	0.102584	8	0.125672	0.108188	8	0.112892	0.103834	8	0.133789	0.134859	8	0.126964	0.105162	8	0.181327	0.148807	8	0.211659	0.192694	8	0.128877	0.115088		8	0.14223	0.0124071	0.126402	0.0111448					8	0.110413	0.0918811	8	0.117335	0.107	8	0.147677	0.125396	8	0.166414	0.135913
			9	0.0746122	0.0693794	9	0.0716003	0.0686118	9	0.0849428	0.0692792	9	0.0918646	0.0842768	9	0.0750518	0.0707184	9	0.103148	0.0907841	9	0.121007	0.11514	9	0.0780129	0.0786495		9	0.0875298	0.00606067	0.0808549	0.00568354					9	0.0756547	0.0615767	9	0.0615731	0.0588296	9	0.0771709	0.0736132	9	0.102189	0.0804258
			10	0.0568709	0.0490162	10	0.0419586	0.0496857	10	0.0665447	0.0505935	10	0.0621369	0.0527807	10	0.0452894	0.0494406	10	0.0587696	0.0624642	10	0.0669125	0.0648386	10	0.0570307	0.0533816		10	0.0569392	0.00322449	0.0540251	0.00218283					10	0.057005	0.0447518	10	0.0388642	0.0362423	10	0.045692	0.0460462	10	0.0581849	0.0524265
			11	0.0488584	0.0381437	11	0.0317571	0.0408413	11	0.0440496	0.0401992	11	0.0413925	0.0376208	11	0.0375848	0.0425366	11	0.0380964	0.0424423	11	0.0427106	0.0385719	11	0.0387449	0.0385676		11	0.0403993	0.00180208	0.0398654	0.00068399					11	0.0414387	0.0360004	11	0.0317739	0.0292484	11	0.0315576	0.0342259	11	0.0422176	0.0403392
			12	0.0376773	0.0350419	12	0.031843	0.0304433	12	0.0312205	0.0322994	12	0.0309044	0.0311647	12	0.0297755	0.033355	12	0.0294812	0.0334647	12	0.0250665	0.024809	12	0.0293073	0.030996		12	0.0306594	0.00124143	0.0314467	0.00109148					12	0.0295748	0.0315756	12	0.0246254	0.0251195	12	0.0265454	0.0277173	12	0.0320313	0.0320945
			13	0.0298554	0.0313395	13	0.0271332	0.0275864	13	0.029545	0.0276272	13	0.026622	0.0285249	13	0.0269223	0.0285384	13	0.0207075	0.0265892	13	0.0178	0.0202539	13	0.0256015	0.0264092		13	0.0255234	0.00148532	0.0271086	0.00111958					13	0.0239868	0.0256878	13	0.0232882	0.0211121	13	0.024156	0.0225854	13	0.026908	0.0274821
			14	0.0240093	0.0254472	14	0.0222245	0.0250365	14	0.0237296	0.0235079	14	0.0245176	0.0245927	14	0.0252427	0.0246965	14	0.0166782	0.0208952	14	0.0152357	0.016971	14	0.0244891	0.0236219		14	0.0220158	0.0013641	0.0230961	0.00100801					14	0.0231087	0.0219276	14	0.0185303	0.0186878	14	0.0200883	0.02041	14	0.0255623	0.0250346
			15	0.0208043	0.0203948	15	0.0185227	0.019455	15	0.0182737	0.019458	15	0.0217174	0.0212349	15	0.02064	0.0225806	15	0.013501	0.0154738	15	0.0128038	0.0145568	15	0.0217853	0.0180182		15	0.018506	0.00125728	0.0188965	0.000974975					15	0.0195479	0.0200141	15	0.0176245	0.0174555	15	0.0175077	0.018379	15	0.0244579	0.0212881
			16	0.0155058	0.0157623	16	0.0153181	0.016192	16	0.0130846	0.015158	16	0.0176896	0.0164356	16	0.0136422	0.0191239	16	0.0120537	0.0112458	16	0.0110129	0.0119409	16	0.0160977	0.0132704		16	0.0143006	0.000790253	0.0148911	0.000920438					16	0.0158577	0.0168873	16	0.0161902	0.0168618	16	0.0157367	0.0151807	16	0.0197933	0.016814
			17	0.00944468	0.0113284	17	0.0111914	0.0109222	17	0.0100684	0.00953037	17	0.012536	0.0114431	17	0.00954562	0.0114353	17	0.00785308	0.00779617	17	0.00955137	0.00802022	17	0.0104616	0.0104466		17	0.0100815	0.000488083	0.0101153	0.000531976					17	0.0128431	0.0128417	17	0.0125323	0.0132816	17	0.0109746	0.0120827	17	0.0125458	0.0108846
			18	0.00589075	0.00721516	18	0.0069155	0.00597816	18	0.00574983	0.00545545	18	0.00821967	0.00713536	18	0.00674476	0.00699434	18	0.0049071	0.00482865	18	0.00573435	0.00536525	18	0.00685164	0.00748381		18	0.0063767	0.000359795	0.00630702	0.000360406					18	0.0103506	0.0101119	18	0.0102739	0.0104076	18	0.00907149	0.0102787	18	0.00745868	0.0068134
			19	0.00354987	0.00401846	19	0.00363403	0.00343768	19	0.00300266	0.00316105	19	0.00485374	0.00390457	19	0.00399625	0.00465021	19	0.00299736	0.00307421	19	0.00319065	0.00345211	19	0.00423623	0.00449907		19	0.0036826	0.000230307	0.00377467	0.000209268					19	0.00857827	0.00860423	19	0.00943033	0.008712	19	0.00826188	0.00834792	19	0.00434486	0.003981
			20	0.00177291	0.0020905	20	0.00197069	0.0018605	20	0.00168448	0.00167219	20	0.00238161	0.00205445	20	0.0024344	0.00265794	20	0.00151152	0.00169121	20	0.00182029	0.00173419	20	0.00232072	0.00237024		20	0.00198708	0.000123833	0.0020164	0.000124778					20	0.00706089	0.00751142	20	0.00754504	0.00732672	20	0.00670171	0.00663825	20	0.00217243	0.00205063
			Delta	0.35433	0.37508	Delta	0.309783	0.340878	Delta	0.344212	0.361501	Delta	0.286625	0.284857	Delta	0.380686	0.372435	Delta	0.212791	0.244846	Delta	0.231703	0.214831	Delta	0.282118	0.301723		Delta	0.300281	0.0208225	0.312019	0.0214266					Delta	0.353684	0.399519	Delta	0.354512	0.394181	Delta	0.28333	0.328508	Delta	0.266135	0.29724
			Theta	0.44132	0.426896	Theta	0.513004	0.471122	Theta	0.468802	0.453119	Theta	0.517636	0.525388	Theta	0.437013	0.423526	Theta	0.635992	0.584073	Theta	0.620368	0.63584	Theta	0.53238	0.517283		Theta	0.520814	0.0265347	0.504656	0.0268975					Theta	0.447337	0.402579	Theta	0.468601	0.42844	Theta	0.540028	0.488654	Theta	0.53192	0.510945
			Alpha	0.161205	0.150367	Alpha	0.13148	0.143362	Alpha	0.146818	0.143092	Alpha	0.145154	0.143138	Alpha	0.140165	0.151707	Alpha	0.118464	0.138865	Alpha	0.113617	0.115163	Alpha	0.139928	0.137613		Alpha	0.137104	0.00549039	0.140413	0.00400393					Alpha	0.137657	0.135206	Alpha	0.115842	0.111623	Alpha	0.119855	0.123318	Alpha	0.151177	0.146238
			Beta	0.036164	0.0404148	Beta	0.0390297	0.0383905	Beta	0.03359	0.0349771	Beta	0.0456806	0.0409731	Beta	0.0363632	0.0448617	Beta	0.0293227	0.028636	Beta	0.0313095	0.0305126	Beta	0.0399679	0.0380702		Beta	0.0364285	0.00184062	0.0371045	0.001929					Beta	0.0546905	0.0559565	Beta	0.0559717	0.0565898	Beta	0.0507464	0.0525283	Beta	0.046315	0.0405436
			Stage	S (%)		Stage	S (%)		Stage	S (%)		Stage	S (%)		Stage	S (%)		Stage	S (%)		Stage	S (%)		Stage	S (%)			Stage	Dark period		light period						Stage	S (%)		Stage	S (%)		Stage	S (%)		Stage	S (%)
			Hz	Dark	Light	Hz	Dark	Light	Hz	Dark	Light	Hz	Dark	Light	Hz	Dark	Light	Hz	Dark	Light	Hz	Dark	Light	Hz	Dark	Light		Hz	AVE	SEM	AVE	SEM					Hz	Dark	Light	Hz	Dark	Light	Hz	Dark	Light	Hz	Dark	Light
NREM			0	0.0148804	0.0133966	0	0.014494	0.0135653	0	0.0133927	0.01215	0	0.00985454	0.00981352	0	0.0121428	0.0120429	0	0.00827654	0.00726533	0	0.00878101	0.00874052	0	0.00808136	0.00765965		0	0.0112379	0.00100013	0.0105792	0.000895789					0	0.0159166	0.0149202	0	0.0156029	0.0179865	0	0.0105441	0.00972224	0	0.00901919	0.0101993
			1	0.0800693	0.0690639	1	0.0764928	0.0688129	1	0.0658561	0.0602417	1	0.0512139	0.0508534	1	0.0612813	0.0603073	1	0.0414784	0.0370782	1	0.0439629	0.0430249	1	0.0394425	0.0393296		1	0.0574747	0.00560571	0.053589	0.00454276					1	0.0843604	0.07444	1	0.082347	0.0956037	1	0.0533973	0.0513456	1	0.0457176	0.0516093
			2	0.145551	0.120394	2	0.133248	0.116694	2	0.125241	0.109853	2	0.103739	0.0995191	2	0.117589	0.107325	2	0.0828228	0.0738165	2	0.0960573	0.0808121	2	0.0855316	0.0825707		2	0.111223	0.00807682	0.098873	0.00625776					2	0.148004	0.124805	2	0.147769	0.135782	2	0.120029	0.10617	2	0.0939352	0.0990878
			3	0.160725	0.137161	3	0.15163	0.130655	3	0.167918	0.142003	3	0.134654	0.125388	3	0.149354	0.136795	3	0.112282	0.104172	3	0.128826	0.121379	3	0.116309	0.11405		3	0.140212	0.00721399	0.126451	0.00454782					3	0.151987	0.138205	3	0.162282	0.135945	3	0.173461	0.136184	3	0.121906	0.125183
			4	0.13449	0.115233	4	0.13593	0.116625	4	0.154074	0.129348	4	0.130302	0.120903	4	0.140105	0.122942	4	0.107198	0.0988216	4	0.145282	0.136001	4	0.115061	0.113269		4	0.132805	0.00542934	0.119143	0.0039527					4	0.126036	0.118688	4	0.130605	0.114031	4	0.15804	0.129317	4	0.131974	0.127646
			5	0.0900308	0.0868716	5	0.0969137	0.0963144	5	0.110772	0.103371	5	0.10769	0.104453	5	0.0964941	0.0914966	5	0.0902786	0.0848546	5	0.103783	0.091406	5	0.0996957	0.10085		5	0.0994573	0.00268239	0.0949522	0.00263751					5	0.0894466	0.0910309	5	0.0918942	0.0923548	5	0.112027	0.111517	5	0.115572	0.107904
			6	0.0630551	0.069115	6	0.0674749	0.0763732	6	0.0737231	0.0808107	6	0.0841964	0.0879368	6	0.0708868	0.0764447	6	0.0825301	0.0844848	6	0.0692728	0.0693404	6	0.0857151	0.0872032		6	0.0746068	0.00300449	0.0789636	0.00262189					6	0.0654578	0.0731421	6	0.0700792	0.0732683	6	0.0801402	0.0884003	6	0.0882592	0.0852342
			7	0.0509962	0.057509	7	0.052538	0.0600949	7	0.0546489	0.0633797	7	0.0666253	0.0720714	7	0.0580417	0.06205	7	0.0800321	0.0839599	7	0.0628313	0.0697527	7	0.0718347	0.0766299		7	0.0621935	0.00359559	0.0681809	0.00321237					7	0.0565827	0.0622978	7	0.05464	0.0593966	7	0.0595832	0.0691517	7	0.0719704	0.070644
			8	0.0435419	0.0499358	8	0.0463736	0.0518334	8	0.0426925	0.0538986	8	0.0558985	0.057814	8	0.0493526	0.0518793	8	0.0746338	0.0775207	8	0.0619936	0.0700997	8	0.0628224	0.0651921		8	0.0546636	0.00397438	0.0597717	0.00356434					8	0.0488935	0.0521172	8	0.0486036	0.0510449	8	0.0471685	0.0564126	8	0.0618662	0.0607972
			9	0.0378628	0.046788	9	0.0399671	0.0460975	9	0.0375633	0.0492106	9	0.0487175	0.052325	9	0.0427762	0.0499358	9	0.0632765	0.0687492	9	0.0576963	0.0611041	9	0.0569099	0.0590511		9	0.0480962	0.0035625	0.0541577	0.00283488					9	0.0385059	0.0427489	9	0.0353209	0.0399599	9	0.0384932	0.0470871	9	0.0498339	0.051884
			10	0.0366992	0.0461482	10	0.0385172	0.0451517	10	0.0345895	0.0463303	10	0.0438448	0.0489458	10	0.0429539	0.0490594	10	0.056078	0.0618925	10	0.0492627	0.0539475	10	0.0541805	0.0560306		10	0.0445157	0.00282882	0.0509383	0.00207083					10	0.0338963	0.0392172	10	0.0298307	0.0358548	10	0.0325291	0.0417338	10	0.0430751	0.0468658
			11	0.0332878	0.0448237	11	0.0367631	0.0425365	11	0.0304436	0.0390975	11	0.0400696	0.0433276	11	0.0402218	0.046545	11	0.0477358	0.0536072	11	0.0416795	0.0465869	11	0.0503033	0.0501732		11	0.0400631	0.00237434	0.0458372	0.0016029					11	0.0297773	0.036324	11	0.0283127	0.0319486	11	0.0269879	0.0370987	11	0.0388458	0.0417431
			12	0.0285244	0.0387836	12	0.0292476	0.0354532	12	0.023951	0.0300713	12	0.0341674	0.0355484	12	0.0321302	0.038175	12	0.0398642	0.0442899	12	0.0335842	0.0392711	12	0.0417581	0.0409216		12	0.0329034	0.00207968	0.0378143	0.00149669					12	0.0247335	0.0303094	12	0.022626	0.0260804	12	0.0209925	0.029753	12	0.0341825	0.0342133
			13	0.0239196	0.0310223	13	0.0229207	0.0294013	13	0.0193504	0.0242397	13	0.0267393	0.027723	13	0.0252933	0.029113	13	0.0331855	0.0357152	13	0.0273708	0.0323881	13	0.0328326	0.0322173		13	0.0264515	0.00167778	0.0302275	0.00122056					13	0.0209022	0.02553	13	0.0181791	0.0215503	13	0.0162775	0.022489	13	0.0278849	0.026686
			14	0.0188356	0.0254462	14	0.0187559	0.023384	14	0.0151617	0.0191819	14	0.0205463	0.0214031	14	0.019935	0.0225455	14	0.025541	0.0271048	14	0.021939	0.0245702	14	0.0264162	0.0248647		14	0.0208913	0.00130856	0.0235626	0.000883642					14	0.0172208	0.0209348	14	0.0153856	0.0179845	14	0.0131899	0.0175324	14	0.0215963	0.0201555
			15	0.0138903	0.0187724	15	0.0146119	0.0177215	15	0.0112254	0.0142517	15	0.0154595	0.0157484	15	0.0159909	0.0167067	15	0.0196257	0.0202123	15	0.01705	0.0185119	15	0.019843	0.0183097		15	0.0159621	0.00102183	0.0175293	0.000667431					15	0.0138501	0.0165783	15	0.0129553	0.0147552	15	0.0106102	0.0135062	15	0.0164538	0.0149768
			16	0.0101963	0.0125708	16	0.0105092	0.0129721	16	0.00827439	0.00968074	16	0.0108361	0.0107393	16	0.0109806	0.0117541	16	0.0147528	0.0147573	16	0.013062	0.0136782	16	0.0136836	0.0129263		16	0.0115369	0.000750882	0.0123849	0.000573087					16	0.0110705	0.0123306	16	0.0107125	0.0118349	16	0.00790627	0.0102081	16	0.0118515	0.0106491
			17	0.00652699	0.00810665	17	0.00667738	0.00792921	17	0.00526594	0.0061246	17	0.00708924	0.00711895	17	0.00691964	0.0071434	17	0.00939832	0.00996448	17	0.00819114	0.00886504	17	0.0089222	0.00854076		17	0.00737386	0.0004836	0.00797414	0.000421267					17	0.00812862	0.00903756	17	0.0079235	0.00837335	17	0.00630481	0.00763066	17	0.00755894	0.00680765
			18	0.00370893	0.00496497	18	0.00378401	0.00458223	18	0.00315063	0.00363175	18	0.00447258	0.00448284	18	0.00409021	0.0041609	18	0.00577306	0.00626918	18	0.00482747	0.00555417	18	0.00571234	0.0053968		18	0.0044399	0.000335322	0.00488036	0.000298217					18	0.0063003	0.00690012	18	0.00605871	0.00646056	18	0.00504402	0.00603497	18	0.00455254	0.00412592
			19	0.00211726	0.00262454	19	0.00210949	0.00252349	19	0.00181546	0.00208761	19	0.00255326	0.00256545	19	0.00230858	0.00236343	19	0.00340911	0.00354916	19	0.00298008	0.00328841	19	0.0032599	0.00315064		19	0.00256914	0.000207159	0.00276909	0.000178057					19	0.00492376	0.005621	19	0.00488596	0.00530935	19	0.00400589	0.0047745	19	0.00259952	0.00235836
			20	0.00109086	0.00126935	20	0.001042	0.00128009	20	0.000890415	0.00103612	20	0.00133128	0.00132049	20	0.00115246	0.00121491	20	0.00182768	0.00191475	20	0.00156694	0.00167789	20	0.00168501	0.00166209		20	0.00132333	0.000119103	0.00142196	0.000104494					20	0.00400607	0.00482129	20	0.00398556	0.00447497	20	0.0032673	0.00393083	20	0.00134497	0.00123024
			Delta	0.610866	0.528723	Delta	0.594214	0.529101	Delta	0.623861	0.544817	Delta	0.527598	0.501116	Delta	0.564823	0.518866	Delta	0.43406	0.398743	Delta	0.517911	0.472623	Delta	0.45604	0.45007		Delta	0.541172	0.0248256	0.493007	0.0174958					Delta	0.599834	0.547169	Delta	0.614897	0.573717	Delta	0.616955	0.534534	Delta	0.509105	0.51143
			Theta	0.232155	0.269496	Theta	0.244871	0.279551	Theta	0.243217	0.29363	Theta	0.299283	0.319093	Theta	0.264011	0.289369	Theta	0.356551	0.376607	Theta	0.301057	0.324244	Theta	0.331463	0.344107		Theta	0.284076	0.0159924	0.312012	0.0127576					Theta	0.243336	0.269523	Theta	0.238475	0.259525	Theta	0.257914	0.302786	Theta	0.315005	0.315425
			Alpha	0.118458	0.158848	Alpha	0.122299	0.148496	Alpha	0.100132	0.126842	Alpha	0.136982	0.143751	Alpha	0.133571	0.153085	Alpha	0.165952	0.180929	Alpha	0.141623	0.161328	Alpha	0.171153	0.166486		Alpha	0.136271	0.00840146	0.154971	0.00570793					Alpha	0.106484	0.129677	Alpha	0.0974588	0.112319	Alpha	0.0880581	0.120379	Alpha	0.138963	0.137775
			Beta	0.0236403	0.0295363	Beta	0.0241221	0.0292871	Beta	0.0193968	0.0225608	Beta	0.0262824	0.0262271	Beta	0.0254515	0.0266367	Beta	0.0351609	0.0364549	Beta	0.0306277	0.0330638	Beta	0.033263	0.0316766		Beta	0.0272431	0.00188417	0.0294304	0.0015404					Beta	0.0344293	0.0387106	Beta	0.0335662	0.0364531	Beta	0.0265283	0.0325791	Beta	0.0279075	0.0251713
			Stage	DT (%)		Stage	DT (%)		Stage	DT (%)		Stage	DT (%)		Stage	DT (%)		Stage	DT (%)		Stage	DT (%)		Stage	DT (%)			Stage	Dark period		light period						Stage	DT (%)		Stage	DT (%)		Stage	DT (%)		Stage	DT (%)
			Hz	Dark	Light	Hz	Dark	Light	Hz	Dark	Light	Hz	Dark	Light	Hz	Dark	Light	Hz	Dark	Light	Hz	Dark	Light	Hz	Dark	Light		Hz	AVE	SEM	AVE	SEM					Hz	Dark	Light	Hz	Dark	Light	Hz	Dark	Light	Hz	Dark	Light
DT sleep			0	none	none	0	none	none	0	none	none	0	none	none	0	none	none	0	none	none	0	none	none	0	none	none		0	none	none	none	none					0	0.00449676		0	0.00748198	0.0108302	0	0.00827812	0.00273382	0	0.00702677
			1	none	none	1	none	none	1	none	none	1	none	none	1	none	none	1	none	none	1	none	none	1	none	none		1	none	none	none	none					1	0.0329655		1	0.042281	0.0780973	1	0.0852921	0.0214431	1	0.0292516
			2	none	none	2	none	none	2	none	none	2	none	none	2	none	none	2	none	none	2	none	none	2	none	none		2	none	none	none	none					2	0.0993394		2	0.106634	0.125597	2	0.110904	0.0627724	2	0.0676452
			3	none	none	3	none	none	3	none	none	3	none	none	3	none	none	3	none	none	3	none	none	3	none	none		3	none	none	none	none					3	0.170221		3	0.136283	0.120307	3	0.143647	0.130619	3	0.0828538
			4	none	none	4	none	none	4	none	none	4	none	none	4	none	none	4	none	none	4	none	none	4	none	none		4	none	none	none	none					4	0.184331		4	0.159783	0.123224	4	0.15406	0.201476	4	0.120396
			5	none	none	5	none	none	5	none	none	5	none	none	5	none	none	5	none	none	5	none	none	5	none	none		5	none	none	none	none					5	0.125069		5	0.14627	0.0767151	5	0.116942	0.144838	5	0.139766
			6	none	none	6	none	none	6	none	none	6	none	none	6	none	none	6	none	none	6	none	none	6	none	none		6	none	none	none	none					6	0.0664832		6	0.107327	0.0671975	6	0.0996942	0.0983997	6	0.120459
			7	none	none	7	none	none	7	none	none	7	none	none	7	none	none	7	none	none	7	none	none	7	none	none		7	none	none	none	none					7	0.0702545		7	0.0608181	0.0651957	7	0.0696386	0.0896314	7	0.0923563
			8	none	none	8	none	none	8	none	none	8	none	none	8	none	none	8	none	none	8	none	none	8	none	none		8	none	none	none	none					8	0.0530729		8	0.0489623	0.0596346	8	0.0482987	0.0659052	8	0.0716952
			9	none	none	9	none	none	9	none	none	9	none	none	9	none	none	9	none	none	9	none	none	9	none	none		9	none	none	none	none					9	0.0282527		9	0.0290188	0.0367521	9	0.0322326	0.0455641	9	0.062698
			10	none	none	10	none	none	10	none	none	10	none	none	10	none	none	10	none	none	10	none	none	10	none	none		10	none	none	none	none					10	0.0313146		10	0.0323542	0.0558024	10	0.0231771	0.0241146	10	0.0500615
			11	none	none	11	none	none	11	none	none	11	none	none	11	none	none	11	none	none	11	none	none	11	none	none		11	none	none	none	none					11	0.0292969		11	0.0304644	0.066898	11	0.0189053	0.0249707	11	0.0408609
			12	none	none	12	none	none	12	none	none	12	none	none	12	none	none	12	none	none	12	none	none	12	none	none		12	none	none	none	none					12	0.0215343		12	0.0199273	0.0452584	12	0.0188403	0.0255586	12	0.0325386
			13	none	none	13	none	none	13	none	none	13	none	none	13	none	none	13	none	none	13	none	none	13	none	none		13	none	none	none	none					13	0.0186805		13	0.0156262	0.0153724	13	0.0146984	0.0181604	13	0.0209168
			14	none	none	14	none	none	14	none	none	14	none	none	14	none	none	14	none	none	14	none	none	14	none	none		14	none	none	none	none					14	0.0158453		14	0.011745	0.0141822	14	0.0116564	0.0102481	14	0.0164098
			15	none	none	15	none	none	15	none	none	15	none	none	15	none	none	15	none	none	15	none	none	15	none	none		15	none	none	none	none					15	0.0114179		15	0.0109997	0.0119224	15	0.0104745	0.00653796	15	0.0175103
			16	none	none	16	none	none	16	none	none	16	none	none	16	none	none	16	none	none	16	none	none	16	none	none		16	none	none	none	none					16	0.00993367		16	0.00963947	0.00782649	16	0.00952047	0.00789431	16	0.0103745
			17	none	none	17	none	none	17	none	none	17	none	none	17	none	none	17	none	none	17	none	none	17	none	none		17	none	none	none	none					17	0.00621704		17	0.00775311	0.00480587	17	0.00839324	0.00677017	17	0.00770387
			18	none	none	18	none	none	18	none	none	18	none	none	18	none	none	18	none	none	18	none	none	18	none	none		18	none	none	none	none					18	0.00910686		18	0.00645746	0.00425787	18	0.00580027	0.00583286	18	0.004637
			19	none	none	19	none	none	19	none	none	19	none	none	19	none	none	19	none	none	19	none	none	19	none	none		19	none	none	none	none					19	0.00630506		19	0.00564985	0.0056646	19	0.00474371	0.00371758	19	0.00309622
			20	none	none	20	none	none	20	none	none	20	none	none	20	none	none	20	none	none	20	none	none	20	none	none		20	none	none	none	none					20	0.00586232		20	0.0045238	0.00445937	20	0.00480297	0.00281193	20	0.00174202
			Delta	none	none	Delta	none	none	Delta	none	none	Delta	none	none	Delta	none	none	Delta	none	none	Delta	none	none	Delta	none	none		Delta	none	none	none	none					Delta	0.611925		Delta	0.591251	0.52394	Delta	0.610845	0.561148	Delta	0.439913
			Theta	none	none	Theta	none	none	Theta	none	none	Theta	none	none	Theta	none	none	Theta	none	none	Theta	none	none	Theta	none	none		Theta	none	none	none	none					Theta	0.249378		Theta	0.278481	0.284582	Theta	0.273041	0.323615	Theta	0.39727
			Alpha	none	none	Alpha	none	none	Alpha	none	none	Alpha	none	none	Alpha	none	none	Alpha	none	none	Alpha	none	none	Alpha	none	none		Alpha	none	none	none	none					Alpha	0.0967749		Alpha	0.0887627	0.153633	Alpha	0.0745749	0.0854758	Alpha	0.128236
			Beta	none	none	Beta	none	none	Beta	none	none	Beta	none	none	Beta	none	none	Beta	none	none	Beta	none	none	Beta	none	none		Beta	none	none	none	none					Beta	0.037425		Beta	0.0340237	0.0270142	Beta	0.0332607	0.0270269	Beta	0.0275536
			Stage	C (%)		Stage	C (%)		Stage	C (%)		Stage	C (%)		Stage	C (%)		Stage	C (%)		Stage	C (%)		Stage	C (%)			Stage	Dark period		light period						Stage	C (%)		Stage	C (%)		Stage	C (%)		Stage	C (%)
			Hz	Dark	Light	Hz	Dark	Light	Hz	Dark	Light	Hz	Dark	Light	Hz	Dark	Light	Hz	Dark	Light	Hz	Dark	Light	Hz	Dark	Light		Hz	AVE	SEM	AVE	SEM					Hz	Dark	Light	Hz	Dark	Light	Hz	Dark	Light	Hz	Dark	Light
Cataplexy			0	none	none	0	none	none	0	none	none	0	none	none	0	none	none	0	none	none	0	none	none	0	none	none		0	none	none	none	none					0	none	none	0	none	none	0	none	none	0	none	none
			1	none	none	1	none	none	1	none	none	1	none	none	1	none	none	1	none	none	1	none	none	1	none	none		1	none	none	none	none					1	none	none	1	none	none	1	none	none	1	none	none
			2	none	none	2	none	none	2	none	none	2	none	none	2	none	none	2	none	none	2	none	none	2	none	none		2	none	none	none	none					2	none	none	2	none	none	2	none	none	2	none	none
			3	none	none	3	none	none	3	none	none	3	none	none	3	none	none	3	none	none	3	none	none	3	none	none		3	none	none	none	none					3	none	none	3	none	none	3	none	none	3	none	none
			4	none	none	4	none	none	4	none	none	4	none	none	4	none	none	4	none	none	4	none	none	4	none	none		4	none	none	none	none					4	none	none	4	none	none	4	none	none	4	none	none
			5	none	none	5	none	none	5	none	none	5	none	none	5	none	none	5	none	none	5	none	none	5	none	none		5	none	none	none	none					5	none	none	5	none	none	5	none	none	5	none	none
			6	none	none	6	none	none	6	none	none	6	none	none	6	none	none	6	none	none	6	none	none	6	none	none		6	none	none	none	none					6	none	none	6	none	none	6	none	none	6	none	none
			7	none	none	7	none	none	7	none	none	7	none	none	7	none	none	7	none	none	7	none	none	7	none	none		7	none	none	none	none					7	none	none	7	none	none	7	none	none	7	none	none
			8	none	none	8	none	none	8	none	none	8	none	none	8	none	none	8	none	none	8	none	none	8	none	none		8	none	none	none	none					8	none	none	8	none	none	8	none	none	8	none	none
			9	none	none	9	none	none	9	none	none	9	none	none	9	none	none	9	none	none	9	none	none	9	none	none		9	none	none	none	none					9	none	none	9	none	none	9	none	none	9	none	none
			10	none	none	10	none	none	10	none	none	10	none	none	10	none	none	10	none	none	10	none	none	10	none	none		10	none	none	none	none					10	none	none	10	none	none	10	none	none	10	none	none
			11	none	none	11	none	none	11	none	none	11	none	none	11	none	none	11	none	none	11	none	none	11	none	none		11	none	none	none	none					11	none	none	11	none	none	11	none	none	11	none	none
			12	none	none	12	none	none	12	none	none	12	none	none	12	none	none	12	none	none	12	none	none	12	none	none		12	none	none	none	none					12	none	none	12	none	none	12	none	none	12	none	none
			13	none	none	13	none	none	13	none	none	13	none	none	13	none	none	13	none	none	13	none	none	13	none	none		13	none	none	none	none					13	none	none	13	none	none	13	none	none	13	none	none
			14	none	none	14	none	none	14	none	none	14	none	none	14	none	none	14	none	none	14	none	none	14	none	none		14	none	none	none	none					14	none	none	14	none	none	14	none	none	14	none	none
			15	none	none	15	none	none	15	none	none	15	none	none	15	none	none	15	none	none	15	none	none	15	none	none		15	none	none	none	none					15	none	none	15	none	none	15	none	none	15	none	none
			16	none	none	16	none	none	16	none	none	16	none	none	16	none	none	16	none	none	16	none	none	16	none	none		16	none	none	none	none					16	none	none	16	none	none	16	none	none	16	none	none
			17	none	none	17	none	none	17	none	none	17	none	none	17	none	none	17	none	none	17	none	none	17	none	none		17	none	none	none	none					17	none	none	17	none	none	17	none	none	17	none	none
			18	none	none	18	none	none	18	none	none	18	none	none	18	none	none	18	none	none	18	none	none	18	none	none		18	none	none	none	none					18	none	none	18	none	none	18	none	none	18	none	none
			19	none	none	19	none	none	19	none	none	19	none	none	19	none	none	19	none	none	19	none	none	19	none	none		19	none	none	none	none					19	none	none	19	none	none	19	none	none	19	none	none
			20	none	none	20	none	none	20	none	none	20	none	none	20	none	none	20	none	none	20	none	none	20	none	none		20	none	none	none	none					20	none	none	20	none	none	20	none	none	20	none	none
			Delta	none	none	Delta	none	none	Delta	none	none	Delta	none	none	Delta	none	none	Delta	none	none	Delta	none	none	Delta	none	none		Delta	none	none	none	none					Delta	none	none	Delta	none	none	Delta	none	none	Delta	none	none
			Theta	none	none	Theta	none	none	Theta	none	none	Theta	none	none	Theta	none	none	Theta	none	none	Theta	none	none	Theta	none	none		Theta	none	none	none	none					Theta	none	none	Theta	none	none	Theta	none	none	Theta	none	none
			Alpha	none	none	Alpha	none	none	Alpha	none	none	Alpha	none	none	Alpha	none	none	Alpha	none	none	Alpha	none	none	Alpha	none	none		Alpha	none	none	none	none					Alpha	none	none	Alpha	none	none	Alpha	none	none	Alpha	none	none
			Beta	none	none	Beta	none	none	Beta	none	none	Beta	none	none	Beta	none	none	Beta	none	none	Beta	none	none	Beta	none	none		Beta	none	none	none	none					Beta	none	none	Beta	none	none	Beta	none	none	Beta	none	none

## Sheet: EMG-OXMC DOX- 0-4W
	EMG (OXMC DOX- 0-4w)
	0W	W	S	R	C	DT	1W	W	S	R	C	DT	2W	W	S	R	C	DT
	n1	0.29267	0.0792147	0.0748708			n1	0.375544	0.0756994	0.0730208		0.0937906	n1	0.264397	0.0637552	0.0594856	0.0815034	0.0880062
	n2	0.283919	0.0894695	0.0912833			n2	0.370051	0.0868338	0.0923986		0.126598	n2	0.67445	0.075621	0.075134	0.107219	0.12264
	n3	0.249209	0.0783761	0.0697253			n3	0.295266	0.090041	0.0857677		0.140374	n3	0.275985	0.0892343	0.0944932	0.0996285	0.112996
	n4	0.194643	0.0670594	0.0668033			n4	0.239624	0.105966	0.10878		0.132876	n4	0.278492	0.113772	0.136269	0.182562	0.149183
	n5	0.330475	0.147772	0.146586			n6	0.306836	0.073148	0.071111			n7	0.224941	0.0768897	0.0734047	0.0902464	0.0948711
	n6	0.27284	0.0772147	0.0658876			n7	0.149228	0.0483189	0.0480711		0.0558238	n8	0.351802	0.153052	0.120982	0.144445	0.194902
	n7	0.135133	0.0580803	0.0579187			n8	0.301604	0.104352	0.0900953
	n8	0.323516	0.117808	0.105084
	AVE	0.260301	0.0893744	0.0847699	#DIV/0!	#DIV/0!	AVE	0.291165	0.0834799	0.0813206	#DIV/0!	0.109893	AVE	0.345011	0.0953874	0.0932949	0.117601	0.1271
	SEM	0.187569	0.0832765	0.0828148	#DIV/0!	#DIV/0!	SEM	0.206405	0.0529059	0.0512591	#DIV/0!	0.0784152	SEM	0.407943	0.0807555	0.0733486	0.0943777	0.0971837
	3W	W	S	R	C	DT	4W	W	S	R	C	DT		One-way ANOVA, repeated, Bonferroni
	n1	0.333453	0.061759	0.0602595	0.0878865	0.0996261	n1	0.322692	0.0560693	0.0563958	0.085382	0.0898082			W	S	R	C	DT
	n2	0.444765	0.0725961	0.0597382	0.0692561	0.0841239	n2	0.609005	0.0780446	0.0594564	0.0776805	0.0948385		0 1	1	1	1	-	-
	n3	0.262203	0.0799604	0.08067	0.105378	0.107978	n3	0.27357	0.0745074	0.0714946	0.0984064	0.107434		0 2	1	1	1	-	-
	n4	0.34107	0.0900638	0.0989648	0.127946	0.143109	n4	0.33426	0.0793352	0.0884743	0.0998294	0.122555		0 3	1	1	1	-	-
	n6	0.259661	0.0929401	0.0974301	0.0956526	0.122122	n6	0.290159	0.0788119	0.075274	0.103458	0.128026		0 4	0.61764	1	1	-	-
	n8	0.355689	0.146563	0.126569	0.136011	0.186465	n8	0.351556	0.155603	0.137281	0.14502	0.179598		1 2	1	1	1	-	1
														1 3	1	1	1	-	1
														1 4	1	1	1	-	1
														2 3	1	1	1	0.70139	1
	AVE	0.332807	0.0906471	0.087272	0.103688	0.123904	AVE	0.36354	0.0870619	0.081396	0.101629	0.120377		2 4	1	1	1	0.5292	1
	SEM	0.167793	0.0727192	0.0630768	0.0613437	0.0897422	SEM	0.302791	0.0850303	0.0727882	0.0573121	0.079934		3 4	1	1	1	1	1
