# Supplementary material for: Dual orexin and MCH neuron-ablated mice display severe sleep attacks and cataplexy
Source: eLife. 2020 Apr 21;9:e54275. doi: 10.7554/eLife.54275 (PMC7173968; doi:10.7554/eLife.54275)
Supplement: Figure 5—source data 1. [file elife-54275-fig5-data1.xlsx]

## Sheet: Hypnogram
	OXMC DOX +					OXMC DOX -					OX DOX -
Epoch	0w	1w	2w	3w	4w	0w	1w	2w	3w	4w	0w	1w	2w	3w	4w
0	W	W	W	W	W	W	W	W	NR	W	NR	NR	W	W	NR
1	W	W	W	W	W	W	W	W	NR	W	NR	NR	W	W	NR
2	W	W	W	W	W	W	W	W	W	W	NR	NR	W	W	NR
3	W	W	W	W	W	W	W	W	W	W	NR	NR	W	W	NR
4	W	W	W	W	W	W	W	W	W	W	NR	NR	W	W	NR
5	W	W	W	W	W	W	W	W	W	W	NR	W	W	W	NR
6	W	W	W	W	W	W	W	W	NR	W	NR	W	W	W	NR
7	W	W	W	W	W	W	W	W	NR	W	NR	W	W	W	NR
8	W	W	W	W	W	W	W	W	NR	W	NR	NR	W	W	NR
9	W	W	W	W	W	W	W	W	NR	W	W	NR	W	W	NR
10	W	W	W	W	W	W	W	W	NR	W	W	NR	W	W	NR
11	W	W	W	W	W	W	W	W	NR	W	W	NR	W	W	NR
12	W	W	W	W	W	W	W	W	NR	W	NR	NR	W	W	NR
13	W	W	W	W	W	W	W	W	NR	W	NR	NR	W	W	NR
14	W	W	W	W	W	W	W	W	NR	W	NR	NR	W	W	NR
15	W	W	W	W	W	W	W	W	NR	W	W	NR	W	W	NR
16	W	W	W	W	W	W	W	W	NR	W	W	NR	W	W	NR
17	W	W	W	W	W	W	W	W	NR	W	W	NR	W	W	W
18	W	W	W	W	W	W	W	W	NR	W	W	NR	W	W	W
19	W	W	W	W	W	W	W	W	NR	W	W	NR	W	W	W
20	W	W	W	W	W	W	W	W	NR	W	W	NR	W	W	W
21	W	W	W	W	W	W	W	W	NR	W	W	NR	W	W	W
22	W	W	W	W	W	W	W	W	NR	W	W	NR	W	W	NR
23	W	W	W	W	W	W	W	W	NR	W	W	NR	W	W	NR
24	W	W	W	W	W	W	W	W	W	W	W	NR	W	W	NR
25	W	W	W	W	W	W	W	W	W	W	NR	NR	W	W	NR
26	W	W	W	W	W	W	W	W	W	W	NR	NR	W	W	NR
27	W	W	W	W	W	W	W	W	W	W	NR	NR	W	W	NR
28	W	W	W	W	W	W	W	W	W	W	NR	NR	W	W	NR
29	W	W	W	W	W	W	W	W	W	W	NR	NR	W	W	NR
30	W	W	W	W	W	W	W	W	W	W	NR	NR	W	W	NR
31	W	W	W	W	W	W	W	W	W	DT	NR	NR	W	W	NR
32	W	W	W	W	W	W	W	W	W	DT	NR	NR	W	W	NR
33	W	W	W	W	W	W	W	W	W	DT	NR	NR	W	W	W
34	W	W	W	W	W	W	W	W	W	DT	NR	NR	W	W	W
35	W	W	W	W	W	W	W	W	W	DT	NR	NR	W	W	W
36	W	W	W	W	W	W	W	W	W	DT	NR	NR	W	W	W
37	W	W	W	W	W	W	W	W	W	W	NR	NR	W	W	NR
38	W	W	W	W	W	W	W	W	W	W	NR	NR	W	W	NR
39	W	W	W	W	W	W	W	W	W	W	NR	NR	W	W	NR
40	W	W	W	W	W	W	W	W	W	W	NR	NR	W	W	NR
41	W	W	W	W	W	W	W	W	W	W	W	NR	W	W	NR
42	W	W	W	W	W	W	W	W	W	W	W	NR	W	W	NR
43	W	W	W	W	W	W	W	W	W	W	W	NR	W	W	NR
44	W	W	W	W	W	W	W	W	W	W	W	NR	W	W	NR
45	W	W	W	W	W	W	W	W	W	W	W	NR	W	W	NR
46	W	W	W	W	W	W	W	W	NR	W	W	NR	W	W	NR
47	W	W	W	W	W	W	W	W	NR	W	NR	NR	W	W	NR
48	W	W	W	W	W	W	W	W	NR	W	NR	NR	W	W	NR
49	W	W	W	W	W	W	W	W	NR	W	NR	W	W	W	NR
50	W	W	W	W	W	W	W	W	NR	W	NR	W	W	W	NR
51	W	W	W	W	W	W	W	W	NR	DT	NR	W	W	W	NR
52	W	W	W	W	W	W	W	W	NR	DT	NR	W	W	W	NR
53	W	W	W	W	W	W	W	W	NR	DT	NR	NR	W	W	NR
54	W	W	W	W	W	W	W	W	NR	DT	NR	NR	W	W	NR
55	W	W	W	W	W	W	W	W	NR	DT	NR	NR	W	W	NR
56	W	W	W	W	W	W	W	W	NR	DT	NR	NR	W	W	NR
57	W	W	W	W	W	W	W	W	NR	DT	NR	NR	W	W	NR
58	W	W	W	W	W	W	W	W	NR	DT	NR	NR	W	W	NR
59	W	W	W	W	W	W	W	W	NR	W	R	NR	W	W	NR
60	W	W	W	W	W	W	W	W	NR	W	R	NR	W	W	NR
61	W	W	W	W	W	W	W	W	NR	W	R	NR	W	W	NR
62	W	W	W	W	W	W	W	W	W	W	R	NR	W	W	NR
63	W	W	W	W	W	W	W	W	W	W	R	NR	W	W	NR
64	W	W	W	W	W	W	W	W	W	W	R	NR	W	W	NR
65	W	W	W	W	W	W	W	W	W	W	R	NR	W	W	NR
66	W	W	W	W	W	W	W	W	W	W	R	NR	W	W	NR
67	W	W	W	W	W	W	W	W	NR	W	R	NR	W	W	NR
68	W	W	W	W	W	W	W	W	NR	W	R	NR	W	W	NR
69	W	W	W	W	W	W	W	W	NR	W	R	NR	W	W	NR
70	W	W	W	W	W	W	W	W	NR	W	R	W	W	W	NR
71	W	W	W	W	W	W	W	W	NR	W	R	W	W	W	NR
72	W	W	W	W	W	W	W	W	NR	W	R	W	W	W	NR
73	W	W	W	W	W	W	W	W	NR	W	R	NR	W	W	NR
74	W	W	W	W	W	W	W	W	NR	W	R	NR	W	W	NR
75	W	W	W	W	W	W	W	W	NR	W	R	NR	W	W	NR
76	W	W	W	W	W	W	W	W	NR	W	R	NR	W	W	NR
77	W	W	W	W	W	W	W	W	NR	W	R	NR	W	W	NR
78	W	W	W	W	W	W	W	W	NR	W	R	NR	W	W	NR
79	W	W	W	W	W	W	W	W	NR	DT	R	NR	W	W	NR
80	W	W	W	W	W	W	W	W	NR	DT	R	NR	W	W	NR
81	W	W	W	W	W	W	W	W	NR	DT	R	NR	W	W	NR
82	W	W	W	W	W	W	W	W	NR	DT	R	NR	W	W	W
83	W	W	W	W	W	W	W	W	R	DT	R	NR	W	W	W
84	W	W	W	W	W	W	W	W	R	DT	R	NR	W	W	W
85	W	W	W	W	W	W	W	W	R	W	R	NR	W	W	W
86	W	W	W	W	W	W	W	W	R	W	R	NR	W	W	W
87	W	W	W	W	W	W	W	W	R	W	R	NR	W	W	NR
88	W	W	W	W	W	W	W	W	R	W	R	NR	W	W	NR
89	W	W	W	W	W	W	W	W	R	W	R	NR	W	W	NR
90	W	W	W	W	W	W	W	W	R	W	R	NR	W	W	NR
91	W	W	W	W	W	W	W	W	W	W	R	NR	W	W	NR
92	W	W	W	W	W	W	W	W	W	W	R	NR	W	W	NR
93	W	W	W	W	W	W	W	W	W	W	R	W	W	W	NR
94	W	W	W	W	W	W	W	W	W	W	R	W	W	W	NR
95	W	W	W	W	W	W	W	W	W	W	R	W	W	W	NR
96	W	W	W	W	W	W	W	W	NR	W	R	W	W	W	NR
97	W	W	W	W	W	W	W	W	NR	W	R	W	W	W	NR
98	W	W	W	W	W	W	W	W	NR	W	R	NR	W	W	NR
99	NR	W	W	W	W	W	W	W	NR	W	R	NR	W	W	NR
100	NR	W	W	W	W	W	W	W	NR	W	W	NR	W	W	NR
101	NR	W	W	W	W	W	W	W	NR	W	W	NR	W	W	NR
102	NR	W	W	W	W	W	W	W	NR	W	W	NR	W	W	NR
103	NR	W	W	W	W	W	W	W	NR	W	W	NR	W	W	NR
104	NR	W	W	W	W	W	W	W	NR	DT	W	NR	W	W	NR
105	NR	W	W	W	W	W	W	W	NR	DT	W	NR	W	W	W
106	NR	W	W	W	W	W	W	W	NR	DT	W	NR	W	W	W
107	NR	W	W	W	W	W	W	W	NR	DT	W	NR	W	W	W
108	NR	W	W	W	W	W	W	W	W	DT	W	NR	W	W	W
109	W	W	W	W	W	W	W	W	W	DT	W	NR	W	W	W
110	W	W	W	W	W	W	W	W	W	DT	W	NR	W	W	W
111	W	W	W	W	W	W	W	W	W	DT	W	NR	W	W	W
112	W	W	W	W	W	W	W	W	NR	W	W	NR	W	W	W
113	W	W	W	W	W	W	W	W	NR	W	W	NR	W	W	NR
114	W	W	W	W	W	W	W	W	NR	W	W	NR	W	W	NR
115	W	W	W	W	W	W	W	W	NR	W	W	NR	W	W	NR
116	W	W	W	W	W	W	W	W	NR	W	W	NR	W	W	NR
117	W	W	W	W	W	W	W	W	NR	W	NR	NR	W	W	NR
118	W	W	W	W	W	W	W	W	W	W	NR	NR	W	W	NR
119	W	W	W	W	W	W	W	W	W	W	NR	NR	W	W	NR
120	W	W	W	W	W	W	W	W	W	W	NR	W	W	W	NR
121	W	W	W	W	W	W	W	W	W	W	NR	W	W	W	NR
122	W	W	W	W	W	W	W	W	W	W	NR	W	W	W	NR
123	W	W	W	W	W	W	W	W	W	W	NR	W	W	W	NR
124	W	W	W	W	W	W	W	W	W	W	NR	NR	W	W	NR
125	W	W	W	W	W	W	W	W	W	W	W	NR	W	W	NR
126	W	W	W	W	W	W	W	W	W	W	W	NR	W	W	NR
127	W	W	W	W	W	W	W	W	W	W	W	W	W	W	NR
128	W	W	W	W	W	W	W	W	W	W	W	W	W	W	NR
129	W	W	W	W	W	W	W	W	W	W	W	W	W	W	NR
130	W	W	W	W	W	W	W	W	W	W	W	NR	W	W	NR
131	W	W	W	W	W	W	W	W	W	W	W	NR	W	W	NR
132	W	W	W	W	W	W	W	W	W	W	NR	NR	W	W	NR
133	W	W	W	W	W	W	W	W	W	W	NR	NR	W	W	NR
134	W	W	W	W	W	W	W	W	W	W	NR	NR	W	W	NR
135	W	W	W	W	W	W	W	W	W	DT	NR	NR	W	W	R
136	W	W	W	W	W	W	W	W	W	DT	NR	NR	W	W	R
137	W	W	W	W	W	W	W	W	W	DT	NR	NR	W	W	R
138	W	W	W	W	W	W	W	W	W	W	NR	NR	W	W	R
139	W	W	W	W	W	W	W	W	W	W	NR	NR	W	W	R
140	W	W	W	W	W	W	W	W	W	W	W	NR	W	W	R
141	W	W	W	W	W	W	W	W	W	W	W	NR	W	W	R
142	W	W	W	W	W	W	W	W	W	W	W	NR	W	W	R
143	W	W	W	W	W	W	W	W	W	W	NR	NR	NR	W	R
144	W	W	W	W	W	W	W	W	W	W	NR	NR	NR	W	R
145	W	W	W	W	W	W	W	W	W	W	NR	NR	NR	W	R
146	W	W	W	W	W	W	W	W	W	W	NR	NR	NR	W	R
147	W	W	W	W	W	W	W	W	W	W	NR	NR	NR	W	R
148	W	W	W	W	W	W	W	W	W	W	NR	NR	W	W	W
149	W	W	W	W	W	W	W	W	W	W	NR	NR	W	W	W
150	W	W	W	W	W	W	W	W	W	W	NR	W	W	W	W
151	W	W	W	W	W	W	W	W	W	W	NR	W	W	W	W
152	W	W	W	W	W	W	W	W	W	W	NR	W	W	W	W
153	W	W	W	W	W	W	W	W	W	W	W	W	W	W	W
154	NR	W	W	W	W	W	W	W	W	W	W	W	W	W	NR
155	NR	W	W	W	W	W	W	W	W	W	W	W	W	W	NR
156	NR	W	W	W	W	W	W	W	W	W	NR	W	W	W	NR
157	NR	W	W	W	W	W	W	W	W	W	NR	W	W	W	NR
158	NR	W	W	W	W	W	W	W	W	W	NR	W	W	W	NR
159	NR	W	W	W	W	W	W	W	W	W	NR	W	W	W	NR
160	NR	W	W	W	W	W	W	W	W	DT	NR	W	W	W	NR
161	NR	W	W	W	W	W	W	W	W	DT	NR	W	W	W	NR
162	NR	W	W	W	W	W	W	W	W	DT	NR	W	W	W	NR
163	NR	W	W	W	W	W	W	W	W	DT	NR	W	W	W	NR
164	NR	W	W	W	W	W	W	W	W	DT	NR	W	W	W	NR
165	NR	W	W	W	W	W	W	W	W	DT	NR	W	W	W	NR
166	NR	W	W	W	W	W	W	W	W	DT	NR	W	W	W	NR
167	W	W	W	W	W	W	W	W	W	W	NR	W	W	W	NR
168	W	W	W	W	W	W	W	W	W	W	NR	W	W	W	NR
169	W	W	W	W	W	W	W	W	W	W	NR	W	W	W	NR
170	W	W	W	W	W	W	W	W	W	W	NR	W	W	W	NR
171	W	W	W	W	W	W	W	W	W	W	NR	W	W	W	W
172	W	W	W	W	W	W	W	W	W	W	W	W	W	W	W
173	W	W	W	W	W	W	W	W	W	W	W	W	W	W	W
174	NR	W	W	W	W	W	W	W	W	W	W	W	W	W	NR
175	NR	W	W	W	W	W	W	W	W	W	NR	W	W	W	NR
176	NR	W	W	W	W	W	W	W	W	W	NR	W	W	W	NR
177	NR	W	W	W	W	W	W	W	W	W	NR	W	W	W	NR
178	NR	W	W	W	W	W	W	W	W	W	NR	W	W	W	NR
179	W	W	W	W	W	W	W	W	W	W	NR	W	W	W	NR
180	W	W	W	W	W	W	W	W	W	W	NR	W	W	W	NR
181	W	W	W	W	W	W	W	W	W	W	NR	W	W	W	NR
182	NR	W	W	W	W	W	W	W	W	W	NR	W	W	W	NR
183	NR	W	W	W	W	W	W	W	W	W	NR	W	W	W	NR
184	NR	W	W	W	W	W	W	W	W	W	NR	W	W	W	NR
185	NR	W	W	W	W	W	W	W	W	W	NR	W	W	W	NR
186	NR	W	W	W	W	W	W	W	W	DT	NR	W	W	W	NR
187	NR	W	W	W	W	W	W	W	W	DT	NR	W	W	W	NR
188	NR	W	W	W	W	W	W	W	W	DT	NR	W	W	W	NR
189	NR	W	W	W	W	W	W	W	W	W	NR	W	W	W	NR
190	NR	W	W	W	W	W	W	W	W	W	NR	W	W	W	NR
191	NR	W	W	W	W	W	W	W	W	W	NR	W	W	W	W
192	NR	W	W	W	W	W	W	W	W	W	NR	W	W	W	W
193	NR	W	W	W	W	W	W	W	W	W	NR	W	W	W	W
194	NR	W	W	W	W	W	W	W	W	W	NR	W	W	W	W
195	NR	W	W	W	W	W	W	W	W	W	NR	W	W	W	NR
196	NR	W	W	W	W	W	W	NR	W	W	NR	W	W	W	NR
197	NR	W	W	W	W	W	W	NR	W	W	W	W	W	W	NR
198	NR	W	W	W	W	W	W	NR	W	DT	W	W	W	W	NR
199	NR	W	W	W	W	W	W	NR	W	DT	W	W	W	W	NR
200	NR	W	W	W	W	W	W	NR	W	DT	W	W	W	W	NR
201	NR	W	W	W	W	W	W	NR	W	DT	W	W	W	W	NR
202	NR	W	W	W	W	W	W	NR	W	DT	W	W	W	W	NR
203	NR	NR	W	W	W	W	W	NR	W	DT	W	W	W	W	NR
204	NR	NR	W	W	W	W	W	NR	W	DT	W	W	W	W	NR
205	NR	NR	W	W	W	W	W	NR	W	DT	W	W	W	W	NR
206	NR	NR	W	W	W	W	W	W	W	DT	W	W	W	W	NR
207	NR	NR	W	W	W	W	W	W	W	DT	W	W	W	W	NR
208	NR	NR	W	W	W	W	W	W	W	DT	W	W	W	W	NR
209	NR	NR	W	W	W	W	W	W	W	DT	W	W	W	W	NR
210	NR	W	W	W	W	W	W	NR	W	DT	W	W	W	W	NR
211	NR	W	W	W	W	W	W	NR	W	DT	W	W	W	W	NR
212	NR	W	W	W	W	W	W	NR	W	DT	W	W	W	W	NR
213	NR	W	W	W	W	W	W	NR	W	W	W	W	W	W	R
214	W	W	W	W	W	NR	W	NR	W	W	W	W	W	W	R
215	W	W	W	W	W	NR	W	NR	W	W	W	W	W	W	R
216	W	W	W	W	W	NR	W	NR	W	W	W	W	W	W	R
217	NR	W	W	W	W	NR	W	NR	W	W	W	W	W	W	R
218	NR	W	W	W	W	NR	W	NR	W	W	W	W	W	W	R
219	NR	W	W	W	W	W	W	NR	W	W	W	W	W	W	R
220	NR	W	W	W	W	W	W	NR	W	W	W	W	W	W	R
221	NR	W	W	W	W	W	W	W	W	W	W	W	W	W	R
222	NR	W	W	W	W	NR	W	W	W	W	W	W	W	W	R
223	NR	W	W	W	W	NR	W	W	W	W	W	W	W	W	R
224	W	W	W	W	W	NR	W	W	W	W	W	W	W	W	R
225	W	W	W	W	W	W	W	W	W	W	W	W	W	W	R
226	W	W	W	W	W	W	W	W	W	W	W	W	W	W	R
227	W	W	W	W	W	W	W	W	W	W	W	W	W	W	R
228	W	W	W	W	W	NR	W	W	W	W	W	W	W	W	R
229	W	W	W	W	W	NR	W	W	W	W	W	W	W	W	R
230	W	W	W	W	W	NR	W	W	W	W	W	W	W	W	R
231	W	W	W	W	W	NR	W	W	W	W	W	W	W	W	R
232	W	W	W	W	W	NR	W	W	W	W	W	W	W	W	R
233	W	W	W	W	W	W	W	W	W	W	W	W	W	W	R
234	W	W	W	W	W	W	W	W	W	W	W	W	W	W	R
235	W	W	W	W	W	W	W	W	W	W	W	W	W	W	R
236	W	W	W	W	W	W	W	W	W	W	W	W	W	W	R
237	W	W	W	W	W	W	W	W	W	W	W	W	W	W	R
238	W	W	W	W	W	W	W	W	C	W	W	W	W	W	R
239	W	W	W	W	W	W	W	W	C	W	W	W	W	W	R
240	W	W	W	W	W	NR	W	W	C	W	W	W	W	W	R
241	W	W	W	W	W	NR	W	W	C	W	W	W	W	W	R
242	W	W	W	W	W	NR	W	W	C	W	W	W	W	W	R
243	W	W	W	W	W	W	W	W	C	W	W	W	W	W	R
244	W	W	W	W	W	W	W	W	W	W	W	W	W	W	R
245	W	W	W	W	W	W	W	W	W	W	W	W	W	W	R
246	W	W	W	W	W	NR	W	W	W	W	W	W	W	W	R
247	W	W	W	W	W	NR	W	W	W	W	W	W	W	W	R
248	W	W	W	W	W	NR	W	W	W	W	W	W	W	W	R
249	W	W	W	W	W	NR	W	W	W	W	W	W	W	W	R
250	W	W	W	W	W	NR	W	W	W	W	W	W	W	W	W
251	W	W	W	W	W	NR	W	W	W	W	W	W	W	W	W
252	W	W	W	W	W	NR	W	W	W	W	W	W	W	W	W
253	W	W	W	W	W	NR	W	W	W	W	W	W	W	W	W
254	W	W	W	W	W	NR	W	W	W	W	W	W	W	W	W
255	W	W	W	W	W	NR	W	W	W	W	W	W	W	W	W
256	W	W	W	W	W	NR	W	W	W	W	W	W	W	W	W
257	W	W	W	W	W	NR	W	W	W	W	W	W	W	W	W
258	W	W	W	W	W	NR	W	W	W	W	W	W	W	W	W
259	W	W	W	W	W	NR	W	W	W	W	W	W	W	W	W
260	W	W	W	W	W	NR	W	W	W	W	W	W	W	W	W
261	W	W	W	W	W	NR	W	W	W	W	W	W	W	W	W
262	W	W	W	W	W	NR	W	W	W	W	W	W	W	W	W
263	W	W	W	W	W	NR	W	W	W	DT	W	W	W	W	W
264	W	W	W	W	W	W	W	W	W	DT	W	W	W	W	W
265	W	W	W	W	W	W	W	W	W	DT	W	W	W	W	W
266	W	W	W	W	W	W	W	W	W	DT	W	W	W	W	W
267	W	W	W	W	W	W	W	W	W	DT	W	W	W	W	W
268	W	W	W	W	W	W	W	W	W	W	W	W	W	W	W
269	W	W	W	W	W	W	W	W	W	W	W	W	W	W	W
270	W	W	W	W	W	W	W	W	W	W	W	W	W	W	W
271	W	W	W	W	W	W	W	W	W	W	W	W	W	W	W
272	W	W	W	W	W	W	W	W	W	W	W	W	W	W	W
273	W	W	W	W	W	W	W	W	W	W	W	W	W	W	W
274	W	W	W	W	W	W	W	W	W	DT	W	W	W	W	W
275	W	W	W	W	W	W	W	W	W	DT	W	W	W	W	W
276	W	W	W	W	W	W	W	W	W	DT	W	W	W	W	W
277	W	W	W	W	W	W	W	W	W	W	W	W	W	W	W
278	W	W	W	W	W	W	W	W	W	W	W	W	W	W	W
279	W	W	W	W	W	W	W	W	W	W	W	W	W	W	W
280	W	W	W	W	W	W	W	W	DT	W	W	W	W	W	W
281	NR	W	W	W	W	W	W	W	DT	W	W	W	W	W	W
282	NR	W	W	W	W	W	W	W	DT	W	W	W	W	W	W
283	NR	W	W	W	W	W	W	W	W	W	W	W	W	W	W
284	NR	W	W	W	W	W	W	W	W	W	W	W	W	W	W
285	NR	W	W	W	W	W	W	W	W	W	W	W	W	W	W
286	NR	W	W	W	W	W	W	W	W	W	W	W	W	W	W
287	NR	W	W	W	W	W	W	W	W	W	W	W	W	W	W
288	NR	W	W	W	W	W	W	W	W	W	W	W	W	W	W
289	NR	W	W	W	W	W	W	W	W	W	W	W	W	W	W
290	NR	W	W	W	W	W	W	W	W	W	W	W	W	W	W
291	W	W	W	W	W	W	W	W	W	W	W	W	W	W	W
292	W	W	W	W	W	W	W	W	W	W	W	W	W	W	W
293	W	W	W	W	W	W	W	W	W	W	W	W	W	W	W
294	W	W	W	W	W	W	W	W	DT	W	W	W	W	W	W
295	W	W	W	W	W	W	W	W	DT	W	W	W	W	W	W
296	W	W	W	W	W	W	W	W	DT	W	W	W	W	W	W
297	W	W	W	W	W	W	W	W	DT	W	W	W	W	W	W
298	W	W	W	W	W	W	W	W	W	DT	W	W	W	W	W
299	W	W	W	W	W	W	W	W	W	DT	W	W	W	W	W
300	W	W	W	W	W	W	W	W	W	DT	W	W	W	W	W
301	W	W	W	W	W	W	W	W	W	DT	W	W	W	W	W
302	W	W	W	W	W	W	W	W	W	DT	W	W	W	W	W
303	W	W	W	W	W	W	W	W	W	DT	W	W	W	W	W
304	W	W	W	W	W	W	W	W	W	DT	W	W	W	W	W
305	W	W	W	W	W	W	W	W	W	DT	W	W	W	W	W
306	W	W	W	W	W	W	W	W	W	W	W	W	W	W	W
307	W	W	W	W	W	W	W	W	W	W	W	W	W	W	W
308	W	W	W	W	W	W	W	W	W	W	W	W	W	W	W
309	W	W	W	W	W	W	W	W	DT	W	W	W	W	W	W
310	W	W	W	W	W	W	W	W	DT	W	W	W	W	W	W
311	W	W	W	W	W	W	W	W	DT	W	W	W	W	W	W
312	W	W	W	W	W	W	W	W	W	W	W	W	W	W	W
313	W	W	W	W	W	W	W	W	W	W	W	W	W	W	W
314	W	W	W	W	W	W	W	W	W	W	W	W	W	W	W
315	W	W	W	W	W	W	W	W	W	W	W	W	W	W	W
316	W	W	W	W	W	W	W	W	W	W	W	W	W	W	W
317	W	W	W	W	W	W	W	W	W	W	W	W	W	W	W
318	W	W	W	W	W	W	W	W	W	W	W	W	W	W	W
319	W	W	W	W	W	W	W	W	W	W	W	W	W	W	W
320	W	W	W	W	W	W	W	W	W	W	W	W	W	W	W
321	W	W	W	W	W	W	W	W	W	W	W	W	W	W	W
322	W	W	W	W	W	W	W	W	W	W	W	W	W	W	W
323	W	W	W	W	W	W	W	W	W	DT	W	W	W	W	W
324	W	W	W	W	W	W	W	W	W	DT	W	W	W	W	W
325	W	W	W	W	W	W	W	W	W	DT	W	W	W	W	W
326	W	W	W	W	W	W	W	W	W	W	W	W	W	W	W
327	W	W	W	W	W	W	W	W	DT	W	W	W	W	W	W
328	W	W	W	W	W	W	W	W	DT	W	W	W	W	W	W
329	W	W	W	W	W	W	W	W	DT	W	W	W	W	W	W
330	W	W	W	W	W	W	W	W	DT	W	W	W	W	W	W
331	W	W	W	W	W	W	W	W	DT	W	W	W	W	W	W
332	W	W	W	W	W	W	W	W	DT	W	W	W	W	W	W
333	W	W	W	W	W	W	W	W	DT	W	W	W	W	W	W
334	W	W	W	W	W	W	W	W	W	W	W	W	W	W	W
335	W	W	W	W	W	W	W	W	W	W	W	W	W	W	W
336	W	W	W	W	W	W	W	W	W	W	W	W	W	W	W
337	W	W	W	W	W	W	W	W	W	W	W	W	W	W	W
338	W	W	W	W	W	W	W	W	W	W	W	W	W	W	W
339	W	W	W	W	W	W	W	W	W	W	W	W	W	W	W
340	W	W	W	W	W	W	W	W	W	W	W	W	W	W	W
341	W	W	W	W	W	W	W	W	W	W	W	W	W	W	W
342	W	W	W	W	W	W	W	W	DT	W	W	W	W	W	W
343	NR	W	W	W	W	W	W	W	DT	W	W	W	W	W	W
344	NR	W	W	W	W	W	W	W	DT	W	W	W	W	W	W
345	NR	W	W	W	W	W	W	W	DT	W	W	W	W	W	W
346	W	W	W	W	W	W	W	W	DT	W	W	W	W	W	W
347	W	W	W	W	W	W	W	W	DT	W	W	W	W	W	W
348	W	W	W	W	W	W	W	W	W	W	W	W	W	W	W
349	W	W	W	W	W	W	W	W	W	W	W	W	W	W	W
350	W	W	W	W	W	W	W	W	W	W	W	W	W	W	W
351	W	W	W	W	W	W	W	W	W	W	W	W	W	W	W
352	NR	W	W	W	W	W	W	W	W	W	W	W	W	W	W
353	NR	W	W	W	W	W	W	W	W	W	W	W	W	W	W
354	NR	W	W	W	W	W	W	W	W	W	W	W	W	W	W
355	NR	W	W	W	W	W	W	W	W	W	W	W	W	W	W
356	NR	W	W	W	W	W	W	W	W	W	W	W	W	W	W
357	NR	W	W	W	W	W	W	W	W	W	W	W	W	W	W
358	NR	W	W	W	W	W	W	W	W	W	W	W	W	W	W
359	NR	W	W	W	W	W	W	W	W	W	W	W	W	W	W
360	NR	W	W	W	W	W	W	W	W	W	W	W	W	W	W
361	NR	W	W	W	W	W	W	W	W	DT	W	W	W	W	W
362	NR	W	W	W	W	W	W	W	W	DT	W	W	W	W	W
363	NR	W	W	W	W	W	W	W	W	DT	W	W	W	W	W
364	NR	W	W	W	W	W	W	W	W	DT	W	W	W	W	W
365	NR	W	W	W	W	W	W	W	W	DT	W	W	W	W	W
366	NR	W	W	W	W	W	W	W	W	W	W	W	W	W	W
367	NR	W	W	W	W	W	W	W	W	W	W	W	W	W	W
368	NR	W	W	W	W	W	W	W	W	W	W	W	W	W	W
369	NR	W	W	W	W	W	W	W	W	W	W	W	W	W	W
370	NR	W	W	W	W	W	W	W	W	W	W	W	W	W	W
371	NR	W	W	W	W	W	W	W	W	W	W	W	W	W	W
372	NR	W	W	W	W	W	W	W	W	W	W	W	W	W	W
373	NR	W	W	W	W	W	DT	W	W	W	W	W	W	W	W
374	NR	W	W	W	W	W	DT	W	W	W	W	W	W	W	W
375	NR	W	W	W	W	W	DT	W	W	W	W	W	W	W	W
376	NR	W	W	W	W	W	DT	W	W	W	W	W	W	W	W
377	NR	W	W	W	W	W	W	W	W	W	W	W	W	W	W
378	NR	W	W	W	W	W	W	W	W	W	W	W	W	W	W
379	NR	W	W	W	W	W	W	W	W	W	W	W	W	W	W
380	NR	W	W	W	W	W	W	W	W	W	W	W	W	W	W
381	NR	W	W	W	W	W	W	W	W	W	W	W	W	W	W
382	W	W	W	W	W	W	W	W	W	W	W	W	W	W	W
383	W	W	W	W	W	W	W	W	W	W	W	W	W	W	W
384	W	W	W	W	W	W	W	W	W	W	W	W	W	W	W
385	W	W	W	W	W	W	W	W	W	W	W	W	W	W	W
386	W	W	W	W	W	W	W	W	W	W	W	W	W	W	W
387	W	W	W	W	W	W	W	W	W	W	W	W	W	W	W
388	NR	W	W	W	W	W	W	W	W	DT	W	W	W	W	W
389	NR	W	W	W	W	W	W	W	W	DT	W	W	W	W	W
390	NR	W	W	W	W	W	W	W	W	DT	W	W	W	W	W
391	NR	W	W	W	W	W	W	W	W	W	W	W	W	W	W
392	W	W	W	W	W	W	W	W	W	W	W	W	W	W	W
393	W	W	W	W	W	W	W	W	W	W	W	W	W	W	W
394	NR	W	W	W	W	W	W	W	W	W	W	W	W	W	W
395	NR	W	W	W	W	W	W	W	W	W	W	W	W	W	W
396	NR	W	W	W	W	W	W	W	W	W	W	W	W	W	W
397	NR	W	W	W	W	W	W	W	W	W	W	W	W	W	W
398	NR	W	W	W	W	W	W	W	W	W	W	W	W	W	W
399	NR	W	W	W	W	W	W	W	W	W	W	W	W	W	W
400	NR	W	W	W	W	W	W	W	W	W	W	W	W	W	W
401	NR	W	W	W	W	W	W	W	W	W	W	W	W	W	W
402	NR	W	W	W	W	W	W	W	W	W	W	W	W	W	W
403	W	W	W	W	W	W	W	W	W	W	W	W	W	W	W
404	W	W	W	W	W	W	W	W	W	W	W	W	W	W	W
405	W	W	W	W	W	W	W	W	W	W	W	W	W	W	W
406	W	W	W	W	W	W	W	W	W	W	W	W	W	W	W
407	W	W	W	W	W	W	W	W	W	W	W	W	W	W	W
408	W	W	W	W	W	W	W	W	W	W	W	W	W	W	W
409	W	W	W	W	W	W	W	W	W	DT	W	W	W	W	W
410	W	W	W	W	W	W	W	W	W	DT	W	W	W	W	W
411	W	W	W	W	W	W	W	W	W	DT	W	W	W	W	W
412	W	W	W	W	W	W	W	W	W	W	W	W	W	W	W
413	W	W	W	W	W	W	W	W	W	W	W	W	W	W	W
414	W	W	W	W	W	W	W	W	W	W	W	W	W	W	W
415	W	W	W	W	W	W	W	W	W	W	W	W	W	W	W
416	W	W	W	W	W	W	W	W	W	W	W	W	W	W	W
417	W	W	W	W	W	W	W	W	W	W	W	W	W	W	W
418	W	W	W	W	W	W	W	W	W	W	W	W	W	W	W
419	W	W	W	W	W	W	W	W	W	W	W	W	W	W	W
420	W	W	W	W	W	W	W	W	W	W	W	W	W	W	W
421	W	W	W	W	W	W	W	W	W	W	W	W	W	W	W
422	W	W	W	W	W	W	W	W	W	W	W	W	W	W	W
423	W	W	W	W	W	W	W	W	W	W	W	W	W	W	W
424	W	W	W	W	W	W	W	W	W	W	W	W	W	W	W
425	W	W	W	W	W	W	W	W	DT	W	W	W	W	W	W
426	W	W	W	W	W	W	W	W	DT	W	W	W	W	W	W
427	W	W	W	W	W	W	W	W	DT	W	W	W	W	W	W
428	W	W	W	W	W	W	W	W	W	W	W	W	W	W	W
429	W	W	W	W	W	W	W	W	W	DT	W	W	W	W	W
430	W	W	W	W	W	W	W	W	W	DT	W	W	W	W	W
431	W	W	W	W	W	W	W	W	W	DT	W	W	W	W	W
432	W	W	W	W	W	W	W	W	W	DT	W	W	W	W	W
433	W	W	W	W	W	W	W	W	W	DT	W	W	W	W	W
434	W	W	W	W	W	W	W	W	W	DT	W	W	W	W	W
435	W	W	W	W	W	W	W	W	W	W	W	W	W	W	W
436	W	W	W	W	W	W	W	W	W	W	W	W	W	W	W
437	W	W	W	W	W	W	W	W	W	W	W	W	W	W	W
438	W	W	W	W	W	W	W	W	W	W	W	W	W	W	W
439	W	W	W	W	W	W	W	W	W	W	W	W	W	W	W
440	W	W	W	W	W	W	W	W	W	W	W	W	W	W	W
441	W	W	W	W	W	W	W	W	W	W	W	W	W	W	W
442	W	W	W	W	W	W	W	W	W	W	W	W	W	W	W
443	W	W	W	W	W	W	W	W	W	W	W	W	W	W	W
444	W	W	W	W	W	W	W	W	W	W	W	W	W	W	W
445	W	W	W	W	W	W	W	W	W	W	W	W	W	W	W
446	W	W	W	W	W	W	W	W	W	W	W	W	W	W	W
447	W	W	W	W	W	W	W	W	W	W	W	W	W	W	W
448	W	W	W	W	W	W	W	W	W	W	W	W	W	W	W
449	W	W	W	W	W	W	W	W	W	W	W	W	W	W	W
450	W	W	W	W	W	W	W	W	W	W	W	W	W	W	W
451	W	W	W	W	W	W	W	W	W	W	W	W	W	W	W
452	W	W	W	W	W	W	W	W	W	DT	W	W	W	W	W
453	W	W	W	W	W	W	W	W	W	DT	W	W	W	W	W
454	W	W	W	W	W	W	W	W	W	DT	W	W	W	W	W
455	W	W	W	W	W	W	W	W	DT	DT	W	W	W	W	W
456	W	W	W	W	W	W	W	W	DT	DT	W	W	W	W	W
457	W	W	W	W	W	W	W	W	DT	DT	W	W	W	W	W
458	W	W	W	W	W	W	W	W	DT	DT	W	W	W	W	W
459	W	W	W	W	W	W	W	W	W	W	W	W	W	W	W
460	W	W	W	W	W	W	W	W	W	W	W	W	W	W	W
461	W	W	W	W	W	W	W	W	W	W	W	W	W	W	W
462	W	W	W	W	W	W	W	W	W	W	W	W	W	W	W
463	W	W	W	W	W	W	W	W	W	W	W	W	W	W	W
464	W	W	W	W	W	W	W	W	W	W	W	W	W	W	W
465	W	W	W	W	W	W	W	W	W	W	W	W	W	W	W
466	W	W	W	W	W	W	W	W	W	W	W	W	W	W	W
467	W	W	W	W	W	W	W	W	W	W	W	W	W	W	W
468	W	W	W	W	W	W	W	W	W	W	W	W	W	W	W
469	W	W	W	W	W	W	W	W	W	W	W	W	W	W	W
470	W	W	W	W	W	W	W	W	DT	W	W	W	W	W	W
471	W	W	W	W	W	W	W	W	DT	W	W	W	W	W	W
472	W	W	W	W	W	W	W	W	DT	W	W	W	W	W	W
473	W	W	W	W	W	W	W	W	W	W	W	W	W	W	W
474	W	W	W	W	W	W	W	W	W	W	W	W	W	W	W
475	W	W	W	W	W	W	W	W	W	C	W	W	W	W	W
476	W	W	W	W	W	W	W	W	W	C	W	W	W	W	W
477	W	W	W	W	W	W	W	W	W	C	W	W	W	W	W
478	W	W	W	W	W	W	W	W	W	C	W	W	W	W	W
479	W	W	W	W	W	W	W	W	W	C	W	W	W	W	W
480	W	W	W	W	W	W	W	W	W	C	W	W	W	W	W
481	W	W	W	W	W	W	W	W	W	C	W	W	W	W	W
482	W	W	W	W	W	W	W	W	W	C	W	W	W	W	W
483	W	W	W	W	W	W	W	W	W	C	W	W	W	W	W
484	W	W	W	W	W	W	W	W	W	C	W	W	W	W	W
485	W	W	W	W	W	W	W	W	W	C	W	W	W	W	W
486	W	W	W	W	W	W	W	DT	W	C	W	W	W	W	W
487	W	W	W	W	W	W	W	DT	W	C	W	W	W	W	W
488	W	W	NR	W	W	W	W	DT	W	C	W	W	W	W	W
489	W	W	NR	W	W	W	W	W	W	C	W	W	W	W	W
490	W	W	NR	W	W	W	W	W	DT	C	W	W	W	W	W
491	W	W	NR	W	W	W	W	W	DT	C	W	W	W	W	W
492	W	W	NR	W	W	W	W	W	DT	C	W	W	W	W	W
493	W	W	NR	W	W	W	W	W	W	C	W	W	W	W	W
494	W	W	NR	W	W	W	W	W	W	C	W	W	W	W	W
495	W	W	W	W	W	W	W	W	W	C	W	W	W	W	W
496	W	W	W	W	W	W	W	W	W	C	W	W	W	W	W
497	W	W	W	W	W	W	W	W	W	C	W	W	W	W	W
498	W	W	W	W	W	W	W	W	W	C	W	W	W	W	W
499	W	W	W	W	W	W	W	W	W	C	W	W	W	W	W
500	W	W	W	W	W	W	W	W	W	C	W	W	W	W	W
501	W	W	W	W	W	W	W	W	W	C	W	W	W	W	W
502	W	W	W	W	W	W	W	W	W	C	W	W	W	W	W
503	W	W	W	W	W	W	W	W	W	C	W	W	W	W	W
504	W	W	W	W	W	W	W	W	W	C	W	W	W	W	W
505	W	W	W	W	W	W	W	W	W	C	W	W	W	W	W
506	W	W	W	W	W	W	W	W	W	C	W	W	W	W	W
507	W	W	W	W	W	W	W	W	W	C	W	W	W	W	W
508	W	W	W	W	W	W	W	W	W	W	W	W	W	W	W
509	W	W	W	W	W	W	W	W	W	W	W	W	W	W	W
510	W	W	W	W	W	W	W	W	W	W	W	W	W	W	W
511	W	W	W	W	W	W	W	W	W	W	W	W	W	W	W
512	W	W	W	W	W	W	W	W	W	W	W	W	W	W	W
513	W	W	W	W	W	W	W	W	W	W	W	W	W	W	W
514	W	W	W	W	W	W	W	W	W	W	W	W	W	W	W
515	W	W	W	W	W	W	W	W	W	W	W	W	W	W	W
516	W	W	W	W	W	W	W	W	W	W	W	W	W	W	W
517	W	W	W	W	W	W	W	W	W	W	W	W	W	W	W
518	W	W	W	W	W	W	W	W	W	W	W	W	W	W	W
519	W	W	W	W	W	W	W	W	W	W	W	W	W	W	W
520	W	W	W	W	W	W	W	W	W	W	W	W	W	W	W
521	W	W	W	W	W	W	W	W	W	W	W	W	W	W	W
522	W	W	W	W	W	W	W	W	W	W	W	W	W	W	W
523	W	W	W	W	W	W	W	W	W	W	W	W	W	W	W
524	W	W	W	W	W	W	W	W	W	W	W	W	W	W	W
525	W	W	W	W	W	W	W	W	W	W	W	W	W	W	W
526	W	W	W	W	W	W	W	W	W	W	W	W	W	W	W
527	W	W	W	W	W	W	W	W	W	W	W	W	W	W	W
528	W	W	W	W	W	W	W	W	W	W	W	W	W	W	W
529	W	W	W	W	W	W	W	W	W	W	W	W	W	W	W
530	W	W	W	W	W	W	W	W	W	W	W	W	W	W	W
531	W	W	W	W	W	W	W	W	W	W	W	W	W	W	W
532	W	W	W	W	W	W	W	W	W	W	W	W	W	W	W
533	W	W	W	W	W	W	W	W	W	W	W	W	W	W	W
534	W	W	W	W	W	W	W	W	W	W	W	W	W	W	W
535	W	W	W	W	W	W	W	W	W	W	W	W	W	W	W
536	W	W	W	W	W	W	W	W	W	W	W	W	W	W	W
537	W	W	W	W	W	W	W	W	W	W	W	W	W	W	W
538	W	W	W	W	W	W	W	W	W	W	W	W	W	W	W
539	W	W	W	W	W	W	W	W	W	W	W	W	W	W	W
540	W	W	W	W	W	W	W	W	W	W	W	W	W	W	W
541	W	W	W	W	W	W	W	W	W	W	W	W	W	W	W
542	W	W	W	W	W	W	W	W	W	W	W	W	W	W	W
543	W	W	W	W	W	W	W	W	W	W	W	W	W	W	W
544	W	W	W	W	W	W	W	W	W	W	W	W	W	W	W
545	W	W	W	W	W	W	W	W	W	W	W	W	W	W	W
546	W	W	W	W	W	W	W	W	W	W	W	W	W	W	W
547	W	W	W	W	W	W	W	W	W	W	W	W	W	W	W
548	W	W	W	W	W	W	W	W	W	W	W	W	W	W	W
549	W	W	W	W	W	W	W	W	W	W	W	W	W	W	W
550	W	W	W	W	W	W	W	W	W	W	W	W	W	W	W
551	W	W	W	W	W	W	W	W	W	W	W	W	W	W	W
552	W	W	W	W	W	W	W	W	W	W	W	W	W	W	W
553	W	W	W	W	W	W	W	W	W	W	W	W	W	W	W
554	W	W	W	W	W	W	W	W	W	W	W	W	W	W	W
555	W	W	W	W	W	W	W	W	W	W	W	W	W	W	W
556	W	W	W	W	W	W	W	W	W	W	W	W	W	W	W
557	W	W	W	W	W	W	W	W	W	W	W	W	W	W	W
558	W	W	W	W	W	W	W	W	W	W	W	W	W	W	W
559	W	W	W	W	W	W	W	W	W	W	W	W	W	W	W
560	W	W	W	W	W	W	W	W	W	W	W	W	W	W	W
561	W	W	W	W	W	W	W	W	DT	W	W	W	W	W	W
562	W	W	W	W	W	W	W	W	DT	W	W	W	W	W	W
563	W	W	W	W	W	W	W	W	DT	W	W	W	W	W	W
564	W	W	W	W	W	W	W	W	W	W	W	W	W	W	W
565	W	W	W	W	W	W	W	W	W	W	W	W	W	W	W
566	W	W	W	W	W	W	W	W	W	W	W	W	W	W	W
567	W	W	W	W	W	W	W	W	W	W	W	W	W	W	W
568	W	W	W	W	W	W	W	W	DT	W	W	W	W	W	W
569	W	W	W	W	W	W	W	W	DT	W	W	W	W	W	W
570	W	W	W	W	W	W	W	W	DT	W	W	W	W	W	W
571	W	W	W	W	W	W	W	W	DT	W	W	W	W	W	W
572	W	W	W	W	W	W	W	W	DT	W	W	W	W	W	W
573	W	W	W	W	W	W	W	W	DT	W	W	W	W	W	W
574	W	W	W	W	W	W	W	W	DT	W	W	W	W	W	W
575	W	W	W	W	W	W	W	W	DT	W	W	W	W	W	W
576	W	W	W	W	W	W	W	W	W	W	W	W	W	W	W
577	W	W	W	W	W	W	W	W	W	W	W	W	W	W	W
578	W	W	W	W	W	W	W	W	W	W	W	W	W	W	W
579	W	W	W	W	W	W	W	W	W	W	W	W	W	W	W
580	W	W	W	W	W	W	W	W	W	W	W	W	W	W	W
581	W	W	W	W	W	W	W	W	W	W	W	W	W	W	W
582	W	W	W	W	W	W	W	W	W	W	W	W	W	W	W
583	W	W	W	W	W	W	W	W	W	W	W	W	W	W	W
584	W	W	W	W	W	W	W	W	W	W	W	W	W	W	W
585	W	W	W	W	W	W	W	W	W	W	W	W	W	W	W
586	W	W	W	W	W	W	W	W	W	W	W	W	W	W	W
587	W	W	W	W	W	W	W	W	W	W	W	W	W	W	W
588	W	W	W	W	W	W	W	W	W	W	W	W	W	W	W
589	W	W	W	W	W	W	W	W	W	W	W	W	W	W	W
590	W	W	W	W	W	W	W	W	W	W	W	W	W	W	W
591	W	W	W	W	W	W	W	W	W	W	W	W	W	W	W
592	W	W	W	W	W	W	W	W	W	W	W	W	W	W	W
593	W	W	W	W	W	W	W	W	W	W	W	W	W	W	W
594	W	W	W	W	W	W	W	W	W	W	W	W	W	W	W
595	W	W	W	W	W	W	W	W	W	W	W	W	W	W	W
596	W	W	W	W	W	W	W	W	W	W	W	W	W	W	W
597	W	W	W	W	W	W	W	W	W	W	W	W	W	W	W
598	W	W	W	W	W	W	W	W	W	W	W	W	W	W	W
599	W	W	W	W	W	W	W	W	W	W	W	W	W	W	W
600	W	W	W	W	W	W	W	W	W	W	W	W	W	W	W
601	W	W	W	W	W	W	W	W	DT	W	W	W	W	W	W
602	W	W	W	W	W	W	W	W	DT	W	W	W	W	W	W
603	W	W	W	W	W	W	W	W	DT	W	W	W	W	W	W
604	W	W	W	W	W	W	W	W	DT	W	W	W	W	W	W
605	W	W	W	W	W	W	W	W	DT	W	W	W	W	W	W
606	W	W	W	W	W	W	W	W	DT	W	W	W	W	W	W
607	W	W	W	W	W	W	W	W	DT	W	W	W	W	W	W
608	W	W	W	W	W	W	W	W	DT	W	W	W	W	W	W
609	W	W	W	W	W	W	W	W	DT	W	W	W	W	W	W
610	W	W	W	W	W	W	W	W	DT	W	W	W	W	W	W
611	W	W	W	W	W	W	W	W	DT	W	W	W	W	W	W
612	W	W	W	W	W	W	W	W	W	W	W	W	W	W	W
613	W	W	W	W	W	W	W	W	W	W	W	W	W	W	W
614	W	W	W	W	W	W	W	W	W	W	W	W	W	W	W
615	W	W	W	W	W	W	W	W	W	W	W	W	W	W	W
616	W	W	W	W	W	W	W	W	W	W	W	W	W	W	W
617	W	W	W	W	W	W	W	W	W	W	W	W	W	W	W
618	W	W	W	W	W	W	W	W	W	W	W	W	W	W	W
619	W	W	W	W	W	W	W	W	W	W	W	W	W	W	W
620	W	W	W	W	W	W	W	W	W	W	W	W	C	W	W
621	W	W	W	W	W	W	W	W	W	W	W	W	C	W	W
622	W	W	W	W	W	W	W	W	W	W	W	W	C	W	W
623	W	W	W	W	W	W	W	W	W	W	W	W	W	W	W
624	W	W	W	W	W	W	W	W	W	W	W	W	W	W	W
625	W	W	W	W	W	W	W	W	W	W	W	W	W	W	W
626	W	W	W	W	W	W	W	W	W	W	W	W	W	W	W
627	W	W	W	W	W	W	W	W	W	W	W	W	W	W	W
628	W	W	W	W	W	W	W	W	W	W	W	W	W	W	W
629	W	W	W	W	W	W	W	W	W	W	W	W	W	W	W
630	W	W	W	W	W	W	W	W	W	W	W	W	W	W	W
631	W	W	W	W	W	W	W	W	W	W	W	W	W	W	W
632	W	W	W	W	W	W	W	W	W	W	W	W	W	W	W
633	W	W	W	W	W	W	W	W	W	W	W	W	W	W	W
634	W	W	W	W	W	W	W	W	W	W	W	W	W	W	W
635	W	W	W	W	W	W	W	W	W	W	W	W	W	W	W
636	W	W	W	W	W	W	W	W	W	W	W	W	W	W	W
637	W	W	W	W	W	W	W	W	W	W	W	W	W	W	W
638	W	W	W	W	W	W	W	W	W	W	W	W	W	W	W
639	W	W	W	W	W	W	W	W	W	W	W	W	W	W	W
640	W	W	W	W	W	W	W	DT	DT	W	W	W	W	W	W
641	W	W	W	W	W	W	W	DT	DT	W	W	W	W	W	W
642	W	W	W	W	W	W	W	DT	DT	W	W	W	W	W	W
643	W	W	W	W	W	W	W	DT	DT	W	W	W	W	W	W
644	W	W	W	W	W	W	W	DT	W	W	W	W	W	W	W
645	W	W	W	W	W	W	W	DT	W	W	W	W	W	W	W
646	W	W	W	W	W	W	W	W	W	W	W	W	W	W	W
647	W	W	W	W	W	W	W	W	W	W	W	W	W	W	W
648	W	W	W	W	W	W	W	W	W	W	W	W	W	W	W
649	W	W	W	W	W	W	W	W	W	W	W	W	W	W	W
650	W	W	W	W	W	W	W	W	W	W	W	W	W	W	W
651	W	W	W	W	W	W	W	W	W	W	W	W	W	W	W
652	W	W	W	W	W	W	W	W	W	W	W	W	W	W	W
653	W	W	W	W	W	W	W	W	W	W	W	W	W	W	W
654	W	W	W	W	W	W	W	DT	W	W	W	W	W	W	W
655	W	W	W	W	W	W	W	DT	W	W	W	W	W	W	W
656	W	W	W	W	W	W	W	DT	W	W	W	W	W	W	W
657	W	W	W	W	W	W	W	DT	W	W	W	W	W	W	W
658	W	W	W	W	W	W	W	DT	W	W	W	W	W	W	W
659	W	W	W	W	W	W	W	DT	W	W	W	W	W	W	W
660	W	W	W	W	W	W	W	DT	W	W	W	W	W	W	W
661	W	W	W	W	W	W	W	W	W	W	W	W	W	W	W
662	W	W	W	W	W	W	W	W	W	W	W	W	W	W	W
663	W	W	W	W	W	W	W	W	W	W	W	W	W	W	W
664	W	W	W	W	W	W	W	W	W	W	W	W	W	W	W
665	W	W	W	W	W	W	W	W	W	W	W	W	W	W	W
666	W	W	W	W	W	W	W	W	W	W	W	W	W	W	W
667	W	W	W	W	W	W	W	W	W	W	W	W	W	W	W
668	W	W	W	W	W	W	W	W	W	W	W	W	W	W	W
669	W	W	W	W	W	W	W	W	W	W	W	W	W	W	W
670	W	W	W	W	W	W	W	W	DT	W	W	W	W	W	W
671	W	W	W	W	W	W	W	W	DT	W	W	W	W	W	W
672	W	W	W	W	W	W	W	W	DT	W	W	W	W	W	W
673	W	W	W	W	W	W	W	W	W	W	W	W	W	W	W
674	W	W	W	W	W	W	W	W	W	W	W	W	W	W	W
675	W	W	W	W	W	W	W	W	W	W	W	W	W	W	W
676	W	W	W	W	W	W	W	W	W	W	W	W	W	W	W
677	W	W	W	W	W	W	W	W	W	W	W	W	W	W	W
678	W	W	W	W	W	W	W	W	W	W	W	W	W	W	W
679	W	W	W	W	W	W	W	W	W	W	W	W	W	W	W
680	W	W	W	W	W	W	W	W	W	W	W	W	W	W	W
681	W	W	W	W	W	W	W	W	W	W	W	W	W	W	W
682	W	W	W	W	W	W	W	W	W	W	W	W	W	W	W
683	W	W	W	W	W	W	W	W	W	W	W	W	W	W	W
684	W	W	W	W	W	W	W	W	W	W	W	W	W	W	W
685	W	W	W	W	W	W	W	W	W	W	W	W	W	W	W
686	W	W	W	W	W	W	W	W	W	W	W	W	W	W	W
687	W	W	W	W	W	W	W	W	DT	W	W	W	W	W	W
688	W	W	W	W	W	W	W	W	DT	W	W	W	W	W	W
689	W	W	W	W	W	W	W	W	DT	W	W	W	W	W	W
690	W	W	W	W	W	W	W	W	W	W	W	W	W	W	W
691	W	W	W	W	W	W	W	W	W	W	W	W	W	W	W
692	W	W	W	W	W	W	W	W	W	W	W	W	W	W	W
693	W	W	W	W	W	W	W	W	W	W	W	W	W	W	W
694	W	W	W	W	W	W	W	W	W	W	W	W	W	W	W
695	W	W	W	W	W	W	W	W	W	W	W	W	W	W	W
696	W	W	W	W	W	W	W	W	W	W	W	W	W	W	W
697	W	W	W	W	W	W	W	W	W	W	W	W	W	W	W
698	W	W	W	W	W	W	W	W	W	W	W	W	W	W	W
699	W	W	W	W	W	W	W	W	W	W	W	W	W	W	W
700	W	W	W	W	W	W	W	W	W	W	W	W	W	W	W
701	W	W	W	W	W	W	W	W	W	W	W	W	W	W	W
702	W	W	W	W	W	W	W	W	W	W	W	W	W	W	W
703	W	W	W	W	W	W	W	W	W	W	W	W	W	W	W
704	W	W	W	W	W	W	W	W	W	W	W	W	W	W	W
705	W	W	W	W	W	W	W	W	W	W	W	W	W	W	W
706	W	W	W	W	W	W	W	W	W	W	W	W	W	W	W
707	W	W	W	W	W	W	W	W	W	W	W	W	W	W	W
708	W	W	W	W	W	W	W	W	W	W	W	W	W	W	W
709	W	W	W	W	W	W	W	W	W	W	W	W	W	W	W
710	W	W	W	W	W	W	W	W	W	W	W	W	W	W	W
711	W	W	W	W	W	W	W	W	W	W	W	W	W	W	W
712	W	W	W	W	W	W	W	W	W	W	W	W	W	W	W
713	W	W	W	W	W	W	W	W	W	W	W	W	W	W	W
714	W	W	W	W	W	W	W	W	DT	W	W	W	W	W	W
715	W	W	W	W	W	W	W	W	DT	W	W	W	W	W	W
716	W	W	W	W	W	W	W	W	DT	W	W	W	W	W	W
717	W	W	W	W	W	W	W	W	W	W	W	W	W	W	W
718	W	W	W	W	W	W	W	W	W	W	W	W	W	W	W
719	W	W	W	W	W	W	W	W	W	W	W	W	W	W	W
720	W	W	W	W	W	W	W	W	W	W	W	W	W	W	W
721	W	W	W	W	W	W	W	W	W	W	W	W	W	W	W
722	W	W	W	W	W	W	W	W	W	W	W	W	W	W	W
723	W	W	W	W	W	W	W	W	W	W	W	W	W	W	W
724	W	W	W	W	W	W	W	W	W	W	W	W	W	W	W
725	W	W	W	W	W	W	W	W	W	W	W	W	W	W	W
726	W	W	W	W	W	W	W	W	W	W	W	W	W	W	W
727	W	W	W	W	W	W	W	W	W	W	W	W	W	W	W
728	W	W	W	W	W	W	W	W	W	W	W	W	W	W	W
729	W	W	W	W	W	W	W	W	W	W	W	W	W	W	W
730	W	W	W	W	W	W	W	W	W	DT	W	W	W	W	W
731	W	W	W	W	W	W	W	W	W	DT	W	W	W	W	W
732	W	W	W	W	W	W	W	W	W	DT	W	W	W	W	W
733	W	W	W	W	W	W	W	W	W	DT	W	W	W	W	W
734	W	W	W	W	W	W	W	W	W	DT	W	W	W	W	W
735	W	W	W	W	W	W	W	W	W	W	W	W	W	W	W
736	W	W	W	W	W	W	W	W	W	W	W	W	W	W	W
737	W	W	W	W	W	W	W	W	W	W	W	W	C	W	W
738	W	W	W	W	W	W	W	W	W	W	W	W	C	W	W
739	W	W	W	W	W	W	W	W	W	W	W	W	C	W	W
740	W	W	W	W	W	W	W	W	W	W	W	W	C	W	W
741	W	W	W	W	W	W	W	W	W	W	W	W	C	W	W
742	W	W	W	W	W	W	W	W	W	W	W	W	C	W	W
743	W	W	W	W	W	W	W	W	W	W	W	W	C	W	W
744	W	W	W	W	W	W	W	W	W	W	W	W	C	W	W
745	W	W	W	W	W	W	W	W	W	W	W	W	C	W	W
746	W	W	W	W	W	W	W	W	W	W	W	W	C	W	W
747	W	W	W	W	W	W	W	W	W	W	W	W	C	W	W
748	W	W	W	W	W	W	W	W	W	W	W	W	W	W	W
749	W	W	W	W	W	W	W	W	W	W	W	W	W	W	W
750	W	W	W	W	W	W	W	W	W	W	W	W	W	W	W
751	W	W	W	W	W	W	W	W	W	W	W	W	W	W	W
752	W	W	W	W	W	W	W	W	W	W	W	W	W	W	W
753	W	W	W	W	W	W	W	W	W	W	W	W	W	W	W
754	W	W	W	W	W	W	W	W	W	W	W	W	W	W	W
755	W	W	W	W	W	W	W	W	W	W	W	W	W	W	W
756	W	W	W	W	W	W	W	W	W	DT	W	W	W	W	W
757	W	W	W	W	W	W	W	DT	W	DT	W	W	W	W	W
758	W	W	W	W	W	W	W	DT	W	DT	W	W	W	W	W
759	W	W	W	W	W	W	W	DT	W	DT	W	W	W	W	W
760	W	W	W	W	W	W	W	DT	W	DT	W	W	W	W	W
761	W	W	W	W	W	W	W	DT	W	W	W	W	W	W	W
762	W	W	W	W	W	W	W	DT	W	W	W	W	W	W	W
763	W	W	W	W	W	W	W	DT	W	W	W	W	W	W	W
764	W	W	W	W	W	W	W	DT	W	W	W	W	W	W	W
765	W	W	W	W	W	W	W	DT	W	W	W	W	W	W	W
766	W	W	W	W	W	W	W	DT	W	W	W	W	W	W	W
767	W	W	W	W	W	W	W	DT	W	W	W	W	W	W	W
768	W	W	W	W	W	W	W	DT	W	W	W	W	W	W	W
769	W	W	W	W	W	W	W	W	W	W	W	W	W	W	W
770	W	W	W	W	W	W	W	W	W	W	W	W	W	W	W
771	W	W	W	W	W	W	W	W	W	W	W	W	W	W	W
772	W	W	W	W	W	W	W	W	W	W	W	W	W	W	W
773	W	W	W	W	W	W	W	W	W	W	W	W	W	W	W
774	W	W	W	W	W	W	W	W	DT	W	W	W	W	W	W
775	W	W	W	W	W	W	W	W	DT	W	W	W	W	W	W
776	W	W	W	W	W	W	W	W	DT	W	W	W	W	W	W
777	W	W	W	W	W	W	W	W	DT	W	W	W	W	W	W
778	W	W	W	W	W	W	W	W	DT	W	W	W	W	W	W
779	W	W	W	W	W	W	W	W	W	W	W	W	W	W	W
780	W	W	W	W	W	W	W	W	W	W	W	W	W	W	W
781	W	W	W	W	W	W	W	W	W	W	W	W	W	W	W
782	W	W	W	W	W	W	W	W	W	W	W	W	W	W	W
783	W	W	W	W	W	W	W	W	W	W	W	W	W	W	W
784	W	W	W	W	W	W	W	W	W	W	W	W	W	W	W
785	W	W	W	W	W	W	W	W	W	W	W	W	W	W	W
786	W	W	W	W	W	W	W	W	W	W	W	W	W	W	W
787	W	W	W	W	W	W	W	W	W	W	W	W	W	W	W
788	W	W	W	W	W	W	W	W	W	W	W	W	W	W	W
789	W	W	W	W	W	W	W	W	W	W	W	W	W	W	W
790	W	W	W	W	W	W	W	W	W	W	W	W	W	W	W
791	W	W	W	W	W	W	W	W	W	W	W	W	W	W	W
792	W	W	W	W	W	W	W	W	W	W	W	W	W	W	W
793	W	W	W	W	W	W	W	W	W	W	W	W	W	W	W
794	W	W	W	W	W	W	W	W	W	W	W	W	W	W	W
795	W	W	W	W	W	W	W	W	W	W	W	W	W	W	W
796	W	W	W	W	W	W	W	W	W	W	W	W	W	W	W
797	W	W	W	W	W	W	W	W	DT	W	W	W	W	W	W
798	W	W	W	W	W	W	W	W	DT	W	W	W	W	W	W
799	W	W	W	W	W	W	W	W	DT	W	W	W	W	W	W
800	W	W	W	W	W	W	W	W	W	W	W	W	W	W	W
801	W	W	W	W	W	W	W	W	W	W	W	W	W	W	W
802	W	W	W	W	W	W	W	W	W	W	W	W	W	W	W
803	W	W	W	W	W	W	W	W	W	W	W	W	W	W	W
804	W	W	W	W	W	W	W	W	W	W	W	W	W	W	W
805	W	W	W	W	W	W	W	W	W	W	W	W	W	W	W
806	W	W	W	W	W	W	W	W	W	W	W	W	W	W	W
807	W	W	W	W	W	W	W	W	W	W	W	W	W	W	W
808	W	W	W	W	W	W	W	W	W	W	W	W	W	W	W
809	W	W	W	W	W	W	W	W	W	W	W	W	W	W	W
810	W	W	W	W	W	W	W	W	W	W	W	W	W	W	W
811	W	W	W	W	W	W	W	W	W	W	W	W	W	W	W
812	W	W	W	W	W	W	W	W	W	W	W	W	W	W	W
813	W	W	W	W	W	W	W	W	W	W	W	W	W	W	W
814	W	W	W	W	W	W	W	W	W	W	W	W	W	W	W
815	W	W	W	W	W	W	W	W	W	W	W	W	W	W	W
816	W	W	W	W	W	W	W	W	W	W	W	W	W	W	W
817	W	W	W	W	W	W	W	W	W	W	W	W	W	W	W
818	W	W	W	W	W	W	W	W	W	W	W	W	W	W	W
819	W	W	W	W	W	W	W	W	W	W	W	W	W	W	W
820	W	W	W	W	W	W	W	W	W	W	W	W	W	W	W
821	W	W	W	W	W	W	W	W	W	W	W	W	W	W	W
822	W	W	W	W	W	W	W	W	W	W	W	W	W	W	W
823	W	W	W	W	W	W	W	W	W	W	W	W	W	W	W
824	W	W	W	W	W	W	W	W	W	W	W	W	W	W	W
825	W	W	W	W	W	W	W	W	W	W	W	W	W	W	W
826	W	W	W	W	W	W	W	W	W	W	W	W	W	W	W
827	W	W	W	W	W	W	W	W	W	W	W	W	W	W	W
828	W	W	W	W	W	W	W	W	W	W	W	W	W	W	W
829	W	W	W	W	W	W	W	W	W	W	W	W	W	W	W
830	W	W	W	W	W	W	W	W	W	W	W	W	W	W	W
831	W	W	W	W	W	W	W	W	W	W	W	W	W	W	W
832	W	W	W	W	W	W	W	W	W	W	W	W	W	W	W
833	W	W	W	W	W	W	W	W	W	W	W	W	W	W	W
834	W	W	W	W	W	W	W	W	W	W	W	W	W	W	W
835	W	W	W	W	W	W	W	W	W	W	W	W	W	W	W
836	W	W	W	W	W	W	W	W	W	W	W	W	W	W	W
837	W	W	W	W	W	W	W	W	W	W	W	W	W	W	W
838	W	W	W	W	W	W	W	W	W	W	W	W	W	W	W
839	W	W	W	W	W	W	W	W	W	W	W	W	W	W	W
840	W	W	W	W	W	W	W	W	W	W	W	W	W	W	W
841	W	W	W	W	W	W	W	W	W	W	W	W	W	W	W
842	W	W	W	W	W	W	W	W	W	W	W	W	W	W	W
843	W	W	W	W	W	W	W	W	W	DT	W	W	W	W	W
844	W	W	W	W	W	W	W	W	W	DT	W	W	W	W	W
845	W	W	W	W	W	W	W	W	W	DT	W	W	W	W	NR
846	W	W	W	W	W	W	W	W	W	DT	W	W	W	W	NR
847	W	W	W	W	W	W	W	W	W	DT	W	W	W	W	NR
848	W	W	W	W	W	W	W	W	W	DT	W	W	W	W	NR
849	W	W	W	W	W	W	W	DT	W	DT	W	W	W	W	NR
850	W	W	W	W	W	W	W	DT	W	DT	W	W	W	W	W
851	W	W	W	W	W	W	W	DT	W	DT	W	W	W	W	W
852	W	W	W	W	W	W	W	DT	W	DT	W	W	W	W	W
853	W	W	W	W	W	W	W	W	W	W	W	W	W	W	W
854	W	W	W	W	W	W	W	W	W	W	W	W	W	W	W
855	W	W	W	W	W	W	W	W	DT	W	W	W	W	W	W
856	W	W	W	W	W	W	W	W	DT	W	W	W	W	W	W
857	W	W	W	W	W	W	W	W	DT	W	W	W	W	W	W
858	W	W	W	W	W	W	W	W	DT	W	W	W	W	W	W
859	W	W	W	W	W	W	W	W	W	W	W	W	W	W	W
860	W	W	W	W	W	W	W	W	W	W	W	W	W	W	W
861	W	W	W	W	W	W	W	W	W	W	W	W	W	W	W
862	W	W	W	W	W	W	W	W	W	W	W	W	W	W	W
863	W	W	W	W	W	W	W	W	W	W	W	W	W	W	W
864	W	W	W	W	W	W	W	W	W	W	W	W	W	W	W
865	W	W	W	W	W	W	W	W	W	W	W	W	W	W	W
866	W	W	W	W	W	W	W	W	W	W	W	W	W	W	W
867	W	W	W	W	W	W	W	W	W	W	W	W	W	W	W
868	W	W	W	W	W	W	W	W	W	W	W	W	W	W	W
869	W	W	W	W	W	W	W	W	W	W	W	W	W	W	W
870	W	W	W	W	W	W	W	W	DT	W	W	W	W	W	W
871	W	W	W	W	W	W	W	W	DT	W	W	W	W	W	W
872	W	W	W	W	W	W	W	W	DT	W	W	W	W	W	W
873	W	W	W	W	W	W	W	W	DT	W	W	W	W	W	W
874	W	W	W	W	W	W	W	W	W	W	W	W	W	W	W
875	W	W	W	W	W	W	W	W	W	W	W	W	W	W	W
876	W	W	W	W	W	W	W	W	W	W	W	W	W	W	W
877	W	W	W	W	W	W	W	W	W	W	W	W	W	W	W
878	W	W	W	W	W	W	W	W	W	W	W	W	W	W	W
879	W	W	W	W	W	W	W	W	W	W	W	W	W	W	W
880	W	W	W	W	W	W	W	W	W	W	W	W	W	W	W
881	W	W	W	W	W	W	W	W	W	W	W	W	W	W	W
882	W	W	W	W	W	W	W	W	W	W	W	W	W	W	W
883	W	W	W	W	W	W	W	W	W	W	W	W	W	W	W
884	W	W	W	W	W	W	W	W	W	W	W	W	W	W	W
885	W	W	W	W	W	W	W	W	W	W	W	W	W	W	W
886	W	W	W	W	W	W	W	W	W	W	W	W	W	W	W
887	W	W	W	W	W	W	W	W	W	W	W	W	W	W	W
888	W	W	W	W	W	W	W	W	W	W	W	W	W	W	W
889	W	W	W	W	W	W	W	DT	W	W	W	W	W	W	W
890	W	W	W	W	W	W	W	DT	W	W	W	W	W	W	W
891	W	W	W	W	W	W	W	DT	W	W	W	W	W	W	W
892	W	W	W	W	W	W	W	DT	W	W	W	W	W	W	W
893	W	W	W	W	W	W	W	W	W	W	W	W	W	W	W
894	W	W	W	W	W	W	W	W	W	W	W	W	W	W	W
895	W	W	W	W	W	W	W	W	W	W	W	W	W	W	W
896	W	W	W	W	W	W	W	W	W	W	W	W	W	W	W
897	W	W	W	W	W	W	W	W	W	W	W	W	W	W	W
898	W	W	W	W	W	W	W	W	W	W	W	W	W	W	W
899	W	W	W	W	W	W	W	W	W	W	W	W	W	W	W
900	W	W	W	W	W	W	W	W	W	W	W	W	W	W	W
901	W	W	W	W	W	W	W	W	W	W	W	W	W	W	W
902	W	W	W	W	W	W	W	W	W	W	W	W	W	W	W
903	W	W	W	W	W	W	W	W	W	W	W	W	W	W	W
904	W	W	W	W	W	W	W	W	W	W	W	W	W	W	W
905	W	W	W	W	W	W	W	W	DT	W	W	W	W	W	W
906	W	W	W	W	W	W	W	W	DT	W	W	W	W	W	W
907	W	W	W	W	W	W	W	W	DT	W	W	W	W	W	W
908	W	W	W	W	W	W	W	W	DT	W	W	W	W	W	W
909	W	W	W	W	W	W	W	W	DT	W	W	W	W	W	W
910	W	W	W	W	W	W	W	W	DT	W	W	W	W	W	W
911	W	W	W	W	W	W	W	W	DT	W	W	W	W	W	W
912	W	W	W	W	W	W	W	W	W	DT	W	W	W	W	W
913	W	W	W	W	W	W	W	W	W	DT	W	W	W	W	W
914	W	W	W	W	W	W	W	W	W	DT	W	W	W	W	W
915	W	W	W	W	W	W	W	W	W	DT	W	W	W	W	W
916	W	W	W	W	W	W	W	W	W	DT	W	W	W	W	W
917	W	W	W	W	W	W	W	W	W	W	W	W	W	W	W
918	W	W	W	W	W	W	W	W	W	W	W	W	W	W	W
919	W	W	W	W	W	W	W	W	W	W	W	W	W	W	W
920	W	W	W	W	W	W	W	W	W	W	W	W	W	W	W
921	W	W	W	W	W	W	W	W	W	W	W	W	W	W	W
922	W	W	W	W	W	W	W	W	W	W	W	W	W	W	W
923	W	W	W	W	W	W	W	W	W	W	W	W	W	W	W
924	W	W	W	W	W	W	W	W	W	C	W	W	W	W	W
925	W	W	W	W	W	W	W	W	W	C	W	W	W	W	W
926	W	W	W	W	W	W	W	W	W	C	W	W	W	W	W
927	W	W	W	W	W	W	W	W	W	C	W	W	W	W	W
928	W	W	W	W	W	W	W	W	W	C	W	W	W	W	W
929	W	W	W	W	W	W	W	W	W	C	W	W	W	W	W
930	W	W	W	W	W	W	W	W	W	C	W	W	W	W	W
931	W	W	W	W	W	W	W	W	W	C	W	W	W	W	W
932	W	W	W	W	W	W	W	W	W	C	W	W	W	W	W
933	W	W	W	W	W	W	W	W	W	C	W	W	W	W	W
934	W	W	W	W	W	W	W	W	W	C	W	W	W	W	W
935	W	W	W	W	W	W	W	W	W	C	W	W	W	W	W
936	W	W	W	W	W	W	W	W	W	C	W	W	W	W	W
937	W	W	W	W	W	W	W	W	W	C	W	W	W	W	W
938	W	W	W	W	W	W	W	W	W	C	W	W	W	W	W
939	W	W	W	W	W	W	W	W	W	C	W	W	W	W	W
940	W	W	W	W	W	W	W	W	W	C	W	W	W	W	W
941	W	W	W	W	W	W	W	W	W	C	W	W	W	W	W
942	W	W	W	W	W	W	W	W	W	C	W	W	W	W	W
943	W	W	W	W	W	W	W	W	W	C	W	W	W	W	W
944	W	W	W	W	W	W	W	W	W	C	W	W	W	W	W
945	W	W	W	W	W	W	W	W	W	C	W	W	W	W	W
946	W	W	W	W	W	W	W	W	W	C	W	W	W	W	W
947	W	W	W	W	W	W	W	W	W	C	W	W	W	W	W
948	W	W	W	W	W	W	W	W	W	C	W	W	W	W	W
949	W	W	W	W	W	W	W	W	W	C	W	W	W	W	W
950	W	W	W	W	W	W	W	W	W	C	W	W	W	W	W
951	W	W	W	W	W	W	W	W	W	C	W	W	W	W	W
952	W	W	W	W	W	W	W	W	W	C	W	W	W	W	W
953	W	W	W	W	W	W	W	W	W	C	W	W	W	W	W
954	W	W	W	W	W	W	W	W	W	C	W	W	W	W	W
955	W	W	W	W	W	W	W	W	W	C	W	W	W	W	W
956	W	W	W	W	W	W	W	W	W	C	W	W	W	W	W
957	W	W	W	W	W	W	W	W	W	C	W	W	W	W	W
958	W	W	W	W	W	W	W	W	W	C	W	W	W	W	W
959	W	W	W	W	W	W	W	W	W	C	W	W	W	W	W
960	W	W	W	W	W	W	W	W	W	C	W	W	W	W	W
961	W	W	W	W	W	W	W	W	W	C	W	W	W	W	W
962	W	W	W	W	W	W	W	W	W	C	W	W	W	W	W
963	W	W	W	W	W	W	W	W	W	C	W	W	W	W	W
964	W	W	W	W	W	W	W	W	W	C	W	W	W	W	W
965	W	W	W	W	W	W	W	W	W	C	W	W	W	W	W
966	W	W	W	W	W	W	W	W	W	C	W	W	W	W	W
967	W	W	W	W	W	W	W	W	W	C	W	W	W	W	W
968	W	W	W	W	W	W	W	W	W	C	W	W	W	W	W
969	W	W	W	W	W	W	W	W	W	C	W	W	W	W	W
970	W	W	W	W	W	W	W	W	W	C	W	W	W	W	W
971	W	W	W	W	W	W	W	W	W	C	W	W	W	W	W
972	W	W	W	W	W	W	W	W	W	C	W	W	W	W	W
973	W	W	W	W	W	W	W	W	W	C	W	W	W	W	W
974	W	W	W	W	W	W	W	W	W	C	W	W	W	W	W
975	W	W	W	W	W	W	W	W	W	W	W	W	W	W	W
976	W	W	W	W	W	W	W	W	W	W	W	W	W	W	W
977	W	W	W	W	W	W	W	W	W	W	W	W	W	W	W
978	W	W	W	W	W	W	W	W	W	W	W	W	W	W	W
979	W	W	W	W	W	W	W	W	W	W	W	W	W	W	W
980	W	W	W	W	W	W	W	W	W	W	W	W	W	W	W
981	W	W	W	W	W	W	W	W	W	W	W	W	W	W	W
982	W	W	W	W	W	W	W	W	W	W	W	W	W	W	W
983	W	W	W	W	W	W	W	W	W	W	W	W	W	W	W
984	W	W	W	W	W	W	W	W	W	W	W	W	W	W	W
985	W	W	W	W	W	W	W	W	W	W	W	W	W	W	W
986	W	W	W	W	W	W	W	W	W	W	W	W	W	W	W
987	W	W	W	W	W	W	W	W	W	W	W	W	W	W	W
988	W	W	W	W	W	W	W	W	W	W	W	W	W	W	W
989	W	W	W	W	W	W	W	W	W	W	W	W	W	W	W
990	W	W	W	W	W	W	W	W	W	W	W	W	W	W	W
991	W	W	W	W	W	W	W	W	DT	W	W	W	W	W	W
992	W	W	W	W	W	W	W	W	DT	W	W	W	W	W	W
993	W	W	W	W	W	W	W	W	DT	W	W	W	W	W	W
994	W	W	W	W	W	W	W	W	DT	W	W	W	W	W	W
995	W	W	W	W	W	W	W	W	W	W	W	W	W	W	W
996	W	W	W	W	W	W	W	W	W	W	W	W	W	W	W
997	W	W	W	W	W	W	W	W	W	W	W	W	W	W	W
998	W	W	W	W	W	W	W	W	W	W	W	W	W	W	W
999	W	W	W	W	W	W	W	W	W	W	W	W	W	W	W
1000	W	W	W	W	W	W	W	W	W	W	W	W	W	W	W
1001	W	W	W	W	W	W	W	W	DT	W	W	W	W	W	W
1002	W	W	W	W	W	W	W	W	DT	W	W	W	W	W	W
1003	W	W	W	W	W	W	W	W	DT	W	W	W	W	W	W
1004	W	W	W	W	W	W	W	W	W	W	W	W	W	W	W
1005	W	W	W	W	W	W	W	W	W	W	W	W	W	W	W
1006	W	W	W	W	W	W	W	W	W	W	W	W	W	W	W
1007	W	W	W	W	W	W	W	W	W	W	W	W	W	W	W
1008	W	W	W	W	W	W	W	W	W	W	W	W	W	W	W
1009	W	W	W	W	W	W	W	W	W	W	W	W	W	W	W
1010	W	W	W	W	W	W	W	W	W	W	W	W	W	W	W
1011	W	W	W	W	W	W	W	W	W	W	W	W	W	W	W
1012	W	W	W	W	W	W	W	W	W	W	W	W	W	W	W
1013	W	W	W	W	W	W	W	W	W	W	W	W	W	W	W
1014	W	W	W	W	W	W	W	W	W	W	W	W	W	W	W
1015	W	W	W	W	W	W	W	W	W	W	W	W	W	W	W
1016	W	W	W	W	W	W	W	W	W	W	W	W	W	W	W
1017	W	W	W	W	W	W	W	W	W	W	W	W	W	W	W
1018	W	W	W	W	W	W	W	W	W	W	W	W	W	W	W
1019	W	W	W	W	W	W	W	W	W	W	W	W	W	W	W
1020	W	W	W	W	W	W	W	W	W	W	W	W	W	W	W
1021	W	W	W	W	W	W	W	W	W	W	W	W	W	W	W
1022	W	W	W	W	W	W	W	W	W	W	W	W	W	W	W
1023	W	W	W	W	W	W	DT	W	W	W	W	W	W	W	W
1024	W	W	W	W	W	W	DT	W	W	W	W	W	W	W	W
1025	W	W	W	W	W	W	DT	W	W	W	W	W	W	W	W
1026	W	W	W	W	W	W	W	W	W	W	W	W	W	W	W
1027	W	W	W	W	W	W	W	W	W	W	W	W	W	W	W
1028	W	W	W	W	W	W	W	W	W	W	W	W	W	W	W
1029	W	W	W	W	W	W	W	W	W	W	W	W	W	W	W
1030	W	W	W	W	W	W	W	W	W	W	W	W	W	W	W
1031	W	W	W	W	W	W	W	W	W	W	W	W	W	W	W
1032	W	W	W	W	W	W	W	W	W	W	W	W	W	W	W
1033	W	W	W	W	W	W	W	W	W	W	W	W	W	W	W
1034	W	W	W	W	W	W	W	W	W	W	W	W	W	W	W
1035	W	W	W	W	W	W	W	W	W	W	W	W	W	W	W
1036	W	W	W	W	W	W	W	W	W	W	W	W	W	W	W
1037	W	W	W	W	W	W	W	W	W	W	W	W	W	W	W
1038	W	W	W	W	W	W	W	W	W	W	W	W	W	W	W
1039	W	W	W	W	W	W	W	W	W	W	W	W	W	W	W
1040	W	W	W	W	W	W	W	W	W	W	W	W	W	W	W
1041	W	W	W	W	W	W	W	W	W	W	W	W	W	W	W
1042	W	W	W	W	W	W	W	W	W	W	W	W	W	W	W
1043	W	W	W	W	W	W	W	W	W	W	W	W	W	W	W
1044	W	W	W	W	W	W	W	W	W	W	W	W	W	W	W
1045	W	W	W	W	W	W	W	W	W	W	W	W	W	W	W
1046	W	W	W	W	W	W	W	W	W	W	W	W	W	W	W
1047	W	W	W	W	W	W	W	W	W	W	W	W	W	W	W
1048	W	W	W	W	W	W	W	W	W	W	W	W	W	W	W
1049	W	W	W	W	W	W	W	W	W	W	W	W	W	W	W
1050	W	W	W	W	W	W	W	W	W	W	W	W	W	W	W
1051	W	W	W	W	W	W	W	W	W	W	W	W	W	W	W
1052	W	W	W	W	W	W	W	W	W	W	W	W	W	W	W
1053	W	W	W	W	W	W	W	W	W	W	W	W	W	W	W
1054	W	W	W	W	W	W	W	W	W	W	W	W	W	W	W
1055	W	W	W	W	W	W	W	W	W	W	W	W	W	W	W
1056	W	W	W	W	W	W	W	W	W	W	W	W	W	W	W
1057	W	W	W	W	W	W	W	W	W	W	W	W	W	W	W
1058	W	W	W	W	W	W	W	W	W	W	W	W	W	W	W
1059	W	W	W	W	W	W	W	W	W	W	W	W	W	W	W
1060	W	W	W	W	W	W	W	W	W	W	W	W	W	W	W
1061	W	W	W	W	W	W	W	W	W	W	W	W	W	W	W
1062	W	W	W	W	W	W	W	W	W	W	W	W	W	W	W
1063	W	W	W	W	W	W	W	W	W	W	W	W	W	W	W
1064	W	W	W	W	W	W	W	W	W	W	W	W	W	W	W
1065	W	W	W	W	W	W	W	W	W	W	W	W	W	W	W
1066	W	W	W	W	W	W	W	W	W	W	W	W	W	W	W
1067	W	W	W	W	W	W	W	W	W	W	W	W	W	W	W
1068	W	W	W	W	W	W	W	W	W	W	W	W	W	W	W
1069	W	W	W	W	W	W	W	W	W	W	W	W	W	W	W
1070	W	W	W	W	W	W	W	W	W	W	W	W	W	W	W
1071	W	W	W	W	W	W	W	W	W	W	W	W	W	W	W
1072	W	W	W	W	W	W	W	W	W	W	W	W	W	W	W
1073	W	W	W	W	W	W	W	W	W	W	W	W	W	W	W
1074	W	W	W	W	W	W	W	W	W	W	W	W	W	W	W
1075	W	W	W	W	W	W	W	W	W	W	W	W	W	W	W
1076	W	W	W	W	W	W	W	W	W	W	W	W	W	W	W
1077	W	W	W	W	W	W	W	DT	W	W	W	W	W	W	W
1078	W	W	W	W	W	W	W	DT	W	W	W	W	W	W	W
1079	W	W	W	W	W	W	W	DT	DT	W	W	W	W	W	W
1080	W	W	W	W	W	W	W	W	DT	W	W	W	W	W	W
1081	W	W	W	W	W	W	W	W	DT	W	W	W	W	W	W
1082	W	W	W	W	W	W	W	W	DT	W	W	W	W	W	W
1083	W	W	W	W	W	W	W	W	W	W	W	W	W	W	W
1084	W	W	W	W	W	W	W	W	W	W	W	W	W	W	W
1085	W	W	W	W	W	W	W	W	W	W	W	W	W	W	W
1086	W	W	W	W	W	W	W	W	W	W	W	W	W	W	W
1087	W	W	W	W	W	W	W	W	W	W	W	W	W	W	W
1088	W	W	W	W	W	W	W	W	W	W	W	W	W	W	W
1089	W	W	W	W	W	W	W	W	W	W	W	W	W	W	W
1090	W	W	W	W	W	W	W	W	W	W	W	W	W	W	W
1091	W	W	W	W	W	W	W	W	W	W	W	W	W	W	W
1092	W	W	W	W	W	W	W	W	W	W	W	W	W	W	W
1093	W	W	W	W	W	W	W	W	W	W	W	W	W	W	W
1094	W	W	W	W	W	W	W	W	W	W	W	W	W	W	W
1095	W	W	W	W	W	W	W	W	W	W	W	W	W	W	W
1096	W	W	W	W	W	W	W	W	W	W	W	W	W	W	W
1097	W	W	W	W	W	W	W	W	W	W	W	W	W	W	W
1098	W	W	W	W	W	W	W	W	DT	W	W	W	W	W	W
1099	W	W	W	W	W	W	W	W	DT	W	W	W	W	W	W
1100	W	W	W	W	W	W	W	W	DT	W	W	W	W	W	W
1101	W	W	W	W	W	W	W	W	DT	W	W	W	W	W	W
1102	W	W	W	W	W	W	W	W	W	W	W	W	W	W	W
1103	W	W	W	W	W	W	W	W	W	W	W	W	W	W	W
1104	W	W	W	W	W	W	W	W	W	W	W	W	W	W	W
1105	W	W	W	W	W	W	W	W	W	W	W	W	W	W	W
1106	W	W	W	W	W	W	W	W	W	W	W	W	W	W	W
1107	W	W	W	W	W	W	W	W	W	W	W	W	W	W	W
1108	W	W	W	W	W	W	W	W	W	W	W	W	W	W	W
1109	W	W	W	W	W	W	W	W	W	W	W	W	W	W	W
1110	W	W	W	W	W	W	W	W	W	W	W	W	W	W	W
1111	W	W	W	W	W	W	W	W	W	W	W	W	W	W	W
1112	W	W	W	W	W	W	W	W	W	W	W	W	W	W	W
1113	W	W	W	W	W	W	W	W	W	W	W	W	W	W	W
1114	W	W	W	W	W	W	W	W	W	W	W	W	W	W	W
1115	W	W	W	W	W	W	W	W	W	W	W	W	W	W	W
1116	W	W	W	W	W	W	W	W	W	W	W	W	W	W	W
1117	W	W	W	W	W	W	W	W	W	W	W	W	W	W	W
1118	W	W	W	W	W	W	W	W	W	W	W	W	W	W	W
1119	W	W	W	W	W	W	W	W	W	W	W	W	W	W	W
1120	W	W	W	W	W	W	W	W	W	W	W	W	W	W	W
1121	W	W	W	W	W	W	W	W	W	W	W	W	W	W	W
1122	W	W	W	W	W	W	W	W	W	W	W	W	W	W	W
1123	W	W	W	W	W	W	W	W	W	W	W	W	W	W	W
1124	W	W	W	W	W	W	W	W	W	W	W	W	W	W	W
1125	W	W	W	W	W	W	W	W	W	W	W	W	W	W	W
1126	W	W	W	W	W	W	W	W	W	W	W	W	W	W	W
1127	W	W	W	W	W	W	W	W	W	W	W	W	W	W	W
1128	W	W	W	W	W	W	W	W	W	W	W	W	W	W	W
1129	W	W	W	W	W	W	W	W	W	W	W	W	W	W	W
1130	W	W	W	W	W	W	W	W	W	W	W	W	W	W	W
1131	W	W	W	W	W	W	W	W	W	W	W	W	W	W	W
1132	W	W	W	W	W	W	W	W	W	W	W	W	W	W	W
1133	W	W	W	W	W	W	W	W	W	W	W	W	W	W	NR
1134	W	W	W	W	W	W	W	W	W	W	W	W	W	W	NR
1135	W	W	W	W	W	W	W	W	W	W	W	W	W	W	NR
1136	W	W	W	W	W	W	W	W	W	W	W	W	W	W	NR
1137	W	W	W	W	W	W	W	W	W	W	W	W	W	W	NR
1138	W	W	W	W	W	W	W	W	W	W	W	W	W	W	W
1139	W	W	W	W	W	W	W	W	W	W	W	W	W	W	W
1140	W	W	W	W	W	W	W	W	W	W	W	W	W	W	W
1141	W	W	W	W	W	W	W	W	W	W	W	W	W	W	W
1142	W	W	W	W	W	W	W	W	W	W	W	W	W	W	W
1143	W	W	W	W	W	W	W	W	W	W	W	W	W	W	W
1144	W	W	W	W	W	W	W	W	W	W	W	W	W	W	W
1145	W	W	W	W	W	W	W	W	W	W	W	W	W	W	W
1146	W	W	W	W	W	W	W	W	W	W	W	W	W	W	W
1147	W	W	W	W	W	W	W	W	W	W	W	W	W	W	W
1148	W	W	W	W	W	W	W	W	W	W	W	W	W	W	W
1149	W	W	W	W	W	W	W	W	W	W	W	W	W	W	W
1150	W	W	W	W	W	W	W	W	W	W	W	W	W	W	W
1151	W	W	W	W	W	W	W	W	W	W	W	W	W	W	W
1152	W	W	W	W	W	W	W	W	W	W	W	W	W	W	W
1153	W	W	W	W	W	W	W	W	DT	W	W	W	W	W	W
1154	W	W	W	W	W	W	W	W	DT	W	W	W	W	W	W
1155	W	W	W	W	W	W	W	W	DT	W	W	W	W	W	W
1156	W	W	W	W	W	W	W	W	DT	W	W	W	W	W	W
1157	W	W	W	W	W	W	W	W	DT	W	W	W	W	W	W
1158	W	W	W	W	W	W	W	W	W	W	W	W	W	W	W
1159	W	W	W	W	W	W	W	W	W	W	W	W	W	W	W
1160	W	W	W	W	W	W	W	W	W	W	W	W	W	W	W
1161	W	W	W	W	W	W	W	W	W	W	W	W	W	W	W
1162	W	W	W	W	W	W	W	W	W	W	W	W	W	W	W
1163	W	W	W	W	W	W	W	W	W	W	W	W	W	W	W
1164	W	W	W	W	W	W	W	W	W	W	W	W	W	W	W
1165	W	W	W	W	W	W	W	W	W	W	W	W	W	W	W
1166	W	W	W	W	W	W	W	W	W	W	W	W	W	W	W
1167	W	W	W	W	W	W	W	W	W	W	W	W	W	W	W
1168	W	W	W	W	W	W	W	W	W	W	W	W	W	W	W
1169	W	W	W	W	W	W	W	W	W	W	W	W	W	W	W
1170	W	W	W	W	W	W	W	W	W	W	W	W	W	W	W
1171	W	W	W	W	W	W	W	W	W	W	W	W	W	W	W
1172	W	W	W	W	W	W	W	W	W	W	W	W	W	W	W
1173	W	W	W	W	W	W	W	W	W	W	W	W	W	W	W
1174	W	W	W	W	W	W	W	DT	W	W	W	W	W	W	W
1175	W	W	W	W	W	W	W	DT	W	W	W	W	W	W	W
1176	W	W	W	W	W	W	W	DT	W	W	W	W	W	W	W
1177	W	W	W	W	W	W	W	W	W	W	W	W	W	W	W
1178	W	W	W	W	W	W	W	W	DT	W	W	W	W	W	W
1179	W	W	W	W	W	W	W	W	DT	W	W	W	W	W	W
1180	W	W	W	W	W	W	W	W	DT	W	W	W	W	W	W
1181	W	W	W	W	W	W	W	W	DT	W	W	W	W	W	W
1182	W	W	W	W	W	W	W	W	DT	W	W	W	W	W	W
1183	W	W	W	W	W	W	W	W	W	W	W	W	W	W	W
1184	W	W	W	W	W	W	W	W	W	W	W	W	W	W	W
1185	W	W	W	W	W	W	W	W	W	W	W	W	W	W	W
1186	W	W	W	W	W	W	W	W	W	W	W	W	W	W	W
1187	W	W	W	W	W	W	W	W	W	W	W	W	W	W	W
1188	W	W	W	W	W	W	W	W	W	W	W	W	W	W	W
1189	W	W	W	W	W	W	W	W	W	W	W	W	W	W	W
1190	W	W	W	W	W	W	W	W	W	W	W	W	W	W	W
1191	W	W	W	W	W	W	W	W	W	W	W	W	W	W	W
1192	W	W	W	W	W	W	W	W	W	W	W	W	W	W	W
1193	W	W	W	W	W	W	W	W	W	W	W	W	W	W	W
1194	W	W	W	W	W	W	W	W	W	W	W	W	W	W	W
1195	W	W	W	W	W	W	W	W	W	W	W	W	W	W	W
1196	W	W	W	W	W	W	W	W	W	W	W	W	W	W	W
1197	W	W	W	W	W	W	W	W	W	W	W	W	W	W	W
1198	W	W	W	W	W	W	W	W	W	W	W	W	W	W	W
1199	W	W	W	W	W	W	W	W	W	W	W	W	W	W	W
1200	W	W	W	W	W	W	W	W	W	W	W	W	W	W	W
1201	W	W	W	NR	W	W	W	W	W	W	W	W	W	W	W
1202	W	W	W	NR	W	W	W	W	W	W	W	W	W	W	W
1203	W	W	W	NR	W	W	W	W	W	W	W	W	W	W	W
1204	W	W	W	NR	W	W	W	W	W	W	W	W	W	W	W
1205	W	W	W	NR	W	W	W	W	W	W	W	W	W	W	W
1206	W	W	W	NR	W	W	W	W	W	W	W	W	W	W	W
1207	W	W	W	NR	W	W	W	W	W	W	W	W	W	W	W
1208	W	W	W	NR	W	W	W	W	W	W	W	W	W	W	W
1209	W	W	W	NR	W	W	W	W	W	W	W	W	W	W	W
1210	W	W	W	W	W	W	W	W	W	W	W	W	W	W	W
1211	W	W	W	W	W	W	W	W	W	W	W	W	W	W	W
1212	W	W	W	W	W	W	W	W	W	W	W	W	W	W	W
1213	W	W	W	W	W	W	W	W	W	W	W	W	W	W	W
1214	W	W	W	W	W	W	W	W	W	W	W	W	W	W	W
1215	W	W	W	NR	W	W	W	W	W	DT	W	W	W	W	W
1216	W	W	W	NR	W	W	W	W	W	DT	W	W	W	W	W
1217	W	W	W	NR	W	W	W	W	W	DT	W	W	W	W	W
1218	W	W	W	NR	W	W	W	W	W	W	W	W	W	W	W
1219	W	W	W	NR	W	W	W	W	W	W	W	W	W	W	W
1220	W	W	W	NR	W	W	W	W	W	W	W	W	W	W	W
1221	W	W	W	NR	W	W	W	W	W	W	W	W	W	W	W
1222	W	W	W	NR	W	W	W	W	W	W	W	W	W	W	W
1223	W	W	W	NR	W	W	W	W	W	W	W	W	W	W	W
1224	W	W	W	NR	W	W	W	W	W	W	W	W	W	W	W
1225	W	W	W	NR	W	W	W	W	DT	W	W	W	W	W	W
1226	W	W	W	NR	W	W	W	W	DT	W	W	W	W	W	W
1227	W	W	W	NR	W	W	W	W	DT	W	W	W	W	W	W
1228	W	W	W	NR	W	W	W	W	W	W	W	W	W	W	W
1229	W	W	W	NR	W	W	W	W	W	W	W	W	W	W	W
1230	W	W	W	NR	W	W	W	W	W	W	W	W	W	W	W
1231	W	W	W	NR	W	W	W	W	W	W	W	W	W	W	W
1232	W	W	W	NR	W	W	W	W	W	W	W	W	W	W	W
1233	W	W	W	NR	W	W	W	W	W	W	W	W	W	W	W
1234	W	W	W	NR	W	W	W	W	W	W	W	W	W	W	W
1235	W	W	W	NR	W	W	W	W	W	W	W	W	W	W	W
1236	W	W	W	NR	W	W	DT	W	W	W	W	W	W	W	W
1237	W	W	W	NR	W	W	DT	W	W	W	W	W	W	W	W
1238	W	W	W	NR	W	W	DT	W	DT	W	W	W	W	W	W
1239	W	W	W	NR	W	W	W	W	DT	W	W	W	W	W	W
1240	W	W	W	NR	W	W	W	W	DT	W	W	W	W	W	W
1241	W	W	W	NR	W	W	W	W	DT	W	W	W	W	W	W
1242	W	W	W	NR	W	W	W	W	W	W	W	W	W	W	W
1243	W	W	W	W	W	W	W	W	W	W	W	W	W	W	W
1244	W	W	W	W	W	W	W	W	W	W	W	W	W	W	W
1245	W	W	W	W	W	W	W	W	W	W	W	W	W	W	W
1246	W	W	W	W	W	W	W	W	W	W	W	W	W	W	W
1247	W	W	W	W	W	W	W	W	W	W	W	W	W	W	W
1248	W	W	W	W	W	W	W	W	W	W	W	W	W	W	W
1249	W	W	W	W	W	W	W	W	W	W	W	W	W	W	W
1250	W	W	W	W	W	W	W	W	W	DT	W	W	W	W	W
1251	W	W	W	W	W	W	W	W	W	DT	W	W	W	W	W
1252	W	W	W	W	W	W	W	W	W	DT	W	W	W	W	W
1253	W	W	W	W	W	W	W	W	W	W	W	W	W	W	W
1254	W	W	W	W	W	W	W	W	W	W	W	W	W	W	W
1255	W	W	W	W	W	W	W	W	W	W	W	W	W	W	W
1256	W	W	W	W	W	W	W	W	W	W	W	W	W	W	W
1257	W	W	W	W	W	W	W	W	W	W	W	W	W	W	W
1258	W	W	W	W	W	W	W	W	W	W	W	W	W	W	W
1259	W	W	W	W	W	W	W	W	W	W	W	W	W	W	W
1260	W	W	W	W	W	W	W	DT	W	W	W	W	W	W	W
1261	W	W	W	W	W	W	W	DT	W	W	W	W	W	W	W
1262	W	W	W	W	W	W	W	DT	W	W	W	W	W	W	W
1263	W	W	W	W	W	W	W	DT	W	W	W	W	W	W	W
1264	W	W	W	W	W	W	W	W	W	W	W	W	W	W	W
1265	W	W	W	W	W	W	W	W	W	W	W	W	W	W	W
1266	W	W	W	W	W	W	W	W	W	W	W	W	W	W	W
1267	W	W	W	W	W	W	W	W	W	W	W	W	W	W	W
1268	W	W	W	W	W	W	W	W	W	W	W	W	W	W	W
1269	W	W	W	W	W	W	W	W	W	W	W	W	W	W	W
1270	W	W	W	W	W	W	W	W	W	DT	W	W	W	W	W
1271	W	W	W	W	W	W	W	W	W	DT	W	W	W	W	W
1272	W	W	W	W	W	W	W	W	W	DT	W	W	W	W	W
1273	W	W	W	W	W	W	W	W	W	W	W	W	W	W	W
1274	W	W	W	W	W	W	W	W	W	W	W	W	W	W	W
1275	W	W	W	W	W	W	W	W	W	W	W	W	W	W	W
1276	W	W	W	W	W	W	W	W	W	W	W	W	W	W	W
1277	W	W	W	W	W	W	W	W	W	W	W	W	W	W	W
1278	W	W	W	W	W	W	W	W	W	W	W	W	W	W	W
1279	W	W	W	W	W	W	W	W	W	W	W	W	W	W	C
1280	W	W	W	W	W	W	W	W	DT	W	W	W	W	W	C
1281	W	W	W	W	W	W	W	W	DT	W	W	W	W	W	C
1282	W	W	W	W	W	W	W	W	DT	DT	W	W	W	W	C
1283	W	W	W	W	W	W	W	W	DT	DT	W	W	W	W	C
1284	W	W	W	W	W	W	W	W	W	DT	W	W	W	W	W
1285	W	W	W	W	W	W	W	W	W	DT	W	W	W	W	W
1286	W	W	W	W	W	W	W	W	W	W	W	W	W	W	W
1287	W	W	W	W	W	W	W	W	W	W	W	W	W	W	W
1288	W	W	W	W	W	W	W	W	W	W	W	W	W	W	W
1289	W	W	W	W	W	W	W	W	W	W	W	W	W	W	W
1290	W	W	W	W	W	W	W	W	W	W	W	W	W	W	W
1291	W	W	W	W	W	W	DT	W	W	W	W	W	W	W	W
1292	W	W	W	W	W	W	DT	W	W	W	W	W	W	W	W
1293	W	W	W	W	W	W	DT	W	W	W	W	W	W	W	W
1294	W	W	W	W	W	W	DT	W	W	W	W	W	W	W	W
1295	W	W	W	W	W	W	W	W	DT	W	W	W	W	W	W
1296	W	W	W	W	W	W	W	W	DT	W	W	W	W	W	W
1297	W	W	W	W	W	W	W	W	DT	W	W	W	W	W	W
1298	W	W	W	W	W	W	W	W	DT	W	W	W	W	W	W
1299	W	W	W	W	W	W	W	W	DT	W	W	W	W	W	W
1300	W	W	W	W	W	W	W	W	W	W	W	W	W	W	W
1301	W	W	W	W	W	W	W	W	W	W	W	W	W	W	W
1302	W	W	W	W	W	W	W	W	W	W	W	W	W	W	W
1303	W	W	W	W	W	W	W	W	W	W	W	W	W	W	W
1304	W	W	W	W	W	W	W	W	W	W	W	W	W	W	W
1305	W	W	W	W	W	W	W	W	W	W	W	W	W	W	W
1306	W	W	W	W	W	W	W	W	W	W	W	W	W	W	W
1307	W	W	W	W	W	W	W	W	W	W	W	W	W	W	W
1308	W	W	W	W	W	W	W	W	W	W	W	W	W	W	W
1309	W	W	W	W	W	W	W	W	W	W	W	W	W	W	W
1310	W	W	W	W	W	W	W	W	W	W	W	W	W	W	W
1311	W	W	W	W	W	W	W	W	W	W	W	W	W	W	W
1312	W	W	W	W	W	W	W	W	W	W	W	W	W	W	W
1313	W	W	W	W	W	W	W	W	W	W	W	W	W	W	W
1314	W	W	W	W	W	W	W	W	W	W	W	W	W	W	W
1315	W	W	W	W	W	W	W	W	W	W	W	W	W	W	W
1316	W	W	W	W	W	W	W	W	W	W	W	W	W	W	NR
1317	W	W	W	W	W	W	W	W	W	W	W	W	W	W	NR
1318	W	W	W	W	W	W	W	W	W	W	W	W	W	W	NR
1319	W	W	W	W	W	W	W	W	W	W	W	W	W	W	NR
1320	W	W	W	W	W	W	W	W	W	W	W	W	W	W	NR
1321	W	W	W	W	W	W	W	W	W	W	W	W	W	W	NR
1322	W	W	W	W	W	W	W	W	W	W	W	W	W	W	NR
1323	W	W	W	W	W	W	W	W	W	W	W	W	W	W	W
1324	W	W	W	W	W	W	W	W	W	W	W	W	W	W	W
1325	W	W	W	W	W	W	W	W	W	W	W	W	W	W	W
1326	W	W	W	W	W	W	W	W	W	W	W	W	W	W	W
1327	W	W	W	W	W	W	W	W	W	W	W	W	W	W	W
1328	W	W	W	W	W	W	W	W	W	W	W	W	W	W	W
1329	W	W	W	W	W	W	W	W	W	W	W	W	W	W	W
1330	W	W	W	W	W	W	W	W	W	W	W	W	W	W	W
1331	W	W	W	W	W	W	W	W	W	W	W	W	W	W	W
1332	W	W	W	W	W	W	W	W	W	W	W	W	W	W	W
1333	W	W	W	W	W	W	W	W	W	W	W	W	W	W	W
1334	W	W	W	W	W	W	W	W	W	W	W	W	W	W	W
1335	W	W	W	W	W	W	W	W	W	W	W	W	W	W	W
1336	W	W	W	W	W	W	W	W	W	W	W	W	W	W	W
1337	W	W	W	W	W	W	W	W	W	W	W	W	W	W	W
1338	W	W	W	W	W	W	W	W	W	W	W	W	W	W	W
1339	W	W	W	W	W	W	W	W	W	W	W	W	W	W	W
1340	W	W	W	W	W	W	W	W	W	W	W	W	W	W	W
1341	W	W	W	W	W	W	W	W	W	W	W	W	W	W	W
1342	W	W	W	W	W	W	W	NR	W	W	W	W	W	W	W
1343	W	W	W	W	W	W	W	NR	W	W	W	W	W	W	W
1344	W	W	W	W	W	W	W	NR	W	DT	W	W	W	W	W
1345	W	W	W	W	W	W	W	NR	W	DT	W	W	W	W	W
1346	W	W	W	W	W	W	W	NR	W	DT	W	W	W	W	W
1347	W	W	W	W	W	W	W	NR	W	DT	W	W	W	W	W
1348	W	W	W	W	W	W	W	W	W	W	W	W	W	W	W
1349	W	W	W	W	W	W	W	W	W	W	W	W	W	W	W
1350	W	W	W	W	W	W	W	NR	W	W	W	W	W	W	W
1351	W	W	W	W	W	W	W	NR	W	W	W	W	W	W	W
1352	W	W	W	W	W	W	W	NR	DT	W	W	W	W	W	W
1353	W	W	W	W	W	W	W	NR	DT	W	W	W	W	W	W
1354	W	W	W	W	W	W	W	NR	DT	W	W	W	W	W	W
1355	W	W	W	W	W	W	W	NR	DT	W	W	W	W	W	W
1356	W	W	W	W	W	W	W	NR	DT	W	W	W	W	W	W
1357	W	W	W	W	W	W	W	W	DT	W	W	W	W	W	W
1358	W	W	W	W	W	W	W	W	DT	W	W	W	W	W	W
1359	W	W	W	W	W	W	W	W	DT	W	W	W	W	W	W
1360	W	W	W	W	W	W	W	NR	W	W	W	W	W	W	W
1361	W	W	W	W	W	W	W	NR	W	W	W	W	W	W	W
1362	W	W	W	W	W	W	W	NR	W	DT	W	W	W	W	W
1363	W	W	W	W	W	W	W	NR	W	DT	W	W	W	W	W
1364	W	W	W	W	W	W	W	NR	W	DT	W	W	W	W	W
1365	W	W	W	W	W	W	W	NR	W	DT	W	W	W	W	W
1366	W	W	W	W	W	W	W	NR	W	DT	W	W	W	W	W
1367	W	W	W	W	W	W	W	NR	W	DT	W	W	W	W	W
1368	W	W	W	W	W	W	W	NR	W	DT	W	W	W	W	W
1369	W	W	W	W	W	W	W	NR	W	W	W	W	W	W	W
1370	W	W	W	W	W	W	W	NR	W	W	W	W	W	W	W
1371	W	W	W	W	W	W	W	NR	W	W	W	W	W	W	W
1372	W	W	W	W	W	W	W	NR	W	W	W	W	W	W	W
1373	W	W	W	W	W	W	W	NR	W	W	W	W	W	W	W
1374	W	W	W	W	W	W	W	R	W	W	W	W	W	W	W
1375	W	W	W	W	W	W	W	R	W	W	W	W	W	W	W
1376	W	W	W	W	W	W	W	R	W	W	W	W	W	W	C
1377	W	W	W	W	W	W	W	W	W	W	W	W	W	W	C
1378	W	W	W	W	W	W	W	W	W	W	W	W	W	W	C
1379	W	W	W	W	W	W	W	W	W	W	W	W	W	W	W
1380	W	W	W	W	W	W	W	W	W	W	W	W	W	W	W
1381	W	W	W	W	W	W	W	W	W	W	W	W	W	W	W
1382	W	W	W	W	W	W	W	W	W	W	W	W	W	W	W
1383	W	W	W	W	W	W	W	W	W	W	W	W	W	W	W
1384	W	W	W	W	W	W	W	W	W	W	W	W	W	W	W
1385	W	W	W	W	W	W	W	W	W	W	W	W	W	W	W
1386	W	W	W	W	W	W	W	W	W	W	W	W	W	W	W
1387	W	W	W	W	W	W	W	W	W	W	W	W	W	W	W
1388	W	W	W	W	W	W	W	W	W	W	W	W	W	W	W
1389	W	W	W	W	W	W	W	W	W	W	W	W	W	W	W
1390	W	W	W	W	W	W	W	W	W	W	W	W	W	W	W
1391	W	W	W	W	W	W	W	W	W	W	W	W	W	W	W
1392	W	W	W	W	W	W	W	W	W	W	W	W	W	W	W
1393	W	W	W	W	W	W	DT	W	W	W	W	W	W	W	W
1394	W	W	W	W	W	W	DT	W	W	W	W	W	W	W	W
1395	W	W	W	W	W	W	DT	W	W	W	W	W	W	W	W
1396	W	W	W	W	W	W	DT	W	W	W	W	W	W	W	W
1397	W	W	W	W	W	W	DT	W	W	W	W	W	W	W	W
1398	W	W	W	W	W	W	W	W	W	W	W	W	W	W	W
1399	W	W	W	W	W	W	W	W	DT	W	W	W	W	W	W
1400	W	W	W	W	W	W	W	W	DT	W	W	W	W	W	W
1401	W	W	W	W	W	W	W	W	DT	W	W	W	W	W	W
1402	W	W	W	W	W	W	W	W	DT	W	W	W	W	W	W
1403	W	W	W	W	W	W	W	W	W	W	W	W	W	W	W
1404	W	W	W	W	W	W	W	W	W	W	W	W	W	W	W
1405	W	W	W	W	W	W	W	W	W	W	W	W	W	W	W
1406	W	W	W	W	W	W	W	W	W	W	W	W	W	W	W
1407	W	W	W	W	W	W	W	W	W	W	W	W	W	W	W
1408	W	W	W	W	W	W	W	W	W	W	W	W	W	W	W
1409	W	W	W	W	W	W	W	W	W	W	W	W	W	W	W
1410	W	W	W	W	W	W	DT	W	W	W	W	W	W	W	W
1411	W	W	W	W	W	W	DT	W	W	W	W	W	W	W	W
1412	W	W	W	W	W	W	DT	W	W	W	W	W	W	W	W
1413	W	W	W	W	W	W	W	W	W	W	W	W	W	W	W
1414	W	W	W	W	W	W	W	W	W	W	W	W	W	W	W
1415	W	W	W	W	W	W	W	W	W	W	W	W	W	W	W
1416	W	W	W	W	W	W	NR	W	W	W	W	W	W	W	W
1417	W	W	W	W	W	W	NR	W	W	W	W	W	W	W	W
1418	W	W	W	W	W	W	NR	DT	W	W	W	W	W	W	W
1419	W	W	W	W	W	W	NR	DT	W	W	W	W	W	W	W
1420	W	W	W	W	W	W	NR	DT	W	W	W	W	W	W	W
1421	W	W	W	W	W	W	W	DT	W	W	W	W	W	W	W
1422	W	W	W	W	W	W	W	DT	W	W	W	W	W	W	W
1423	W	W	W	W	W	W	W	DT	W	W	W	W	W	W	W
1424	W	W	W	W	W	W	W	DT	W	W	W	W	W	W	W
1425	W	W	W	W	W	W	W	DT	W	W	W	W	W	W	W
1426	W	W	W	W	W	W	W	DT	W	W	W	W	W	W	W
1427	W	W	W	W	W	W	W	DT	W	W	W	W	W	W	W
1428	W	W	W	W	W	W	W	DT	W	W	W	W	W	W	W
1429	W	W	W	W	W	W	W	W	W	W	W	W	W	W	W
1430	W	W	W	W	W	W	W	W	W	W	W	W	W	W	W
1431	W	W	W	W	W	W	W	W	W	W	W	W	W	W	W
1432	W	W	W	W	W	W	W	W	W	W	W	W	W	W	W
1433	W	W	W	W	W	W	W	W	W	W	W	W	W	W	W
1434	W	W	W	W	W	W	W	W	W	W	W	W	W	W	W
1435	W	W	W	W	W	W	W	W	W	W	W	W	W	W	W
1436	W	W	W	W	W	W	W	NR	W	W	W	W	W	W	W
1437	W	W	W	W	W	W	W	NR	W	W	W	W	W	W	W
1438	W	W	W	W	W	W	W	NR	W	W	W	W	W	W	W
1439	W	W	W	W	W	W	W	NR	W	W	W	W	W	W	W
1440	W	W	W	W	W	W	W	NR	W	W	W	W	W	W	W
1441	W	W	W	W	W	W	W	NR	W	W	W	W	W	W	W
1442	W	W	W	W	W	W	W	NR	W	W	W	W	W	W	W
1443	W	W	W	W	W	W	W	NR	W	W	W	W	W	W	W
1444	W	W	W	W	W	W	W	NR	W	W	W	W	W	W	W
1445	W	W	W	W	W	W	W	NR	W	W	W	W	W	W	W
1446	W	W	W	W	W	W	W	NR	W	W	W	W	W	W	W
1447	W	W	W	W	W	W	W	NR	W	W	W	W	W	W	W
1448	W	W	W	W	W	W	W	NR	W	W	W	W	W	W	W
1449	W	W	W	W	W	W	W	NR	W	W	W	W	W	W	C
1450	W	W	W	W	W	W	W	NR	W	W	W	W	C	W	C
1451	W	W	W	W	W	W	W	NR	W	W	W	W	C	W	C
1452	W	W	W	W	W	W	W	NR	W	W	W	W	C	W	C
1453	W	W	W	W	W	W	W	NR	W	W	W	W	C	W	C
1454	W	W	W	W	W	W	W	NR	W	W	W	W	C	W	W
1455	W	W	W	W	W	W	W	NR	W	W	W	W	W	W	W
1456	W	W	W	W	W	W	W	NR	W	W	W	W	W	W	W
1457	W	W	W	W	W	W	W	NR	W	W	W	W	W	W	W
1458	W	W	W	W	W	W	W	NR	W	W	W	W	W	W	W
1459	W	W	W	W	W	W	W	NR	W	W	W	W	W	W	W
1460	W	W	W	W	W	W	W	NR	W	W	W	W	W	W	W
1461	W	W	W	W	W	W	W	NR	W	DT	W	W	W	W	W
1462	W	W	W	W	W	W	W	NR	W	DT	W	W	W	W	W
1463	W	W	W	W	W	W	W	NR	W	DT	W	W	W	W	W
1464	W	W	W	W	W	W	W	NR	W	DT	W	W	W	W	W
1465	W	W	W	W	W	W	W	NR	W	DT	W	W	W	W	W
1466	W	W	W	W	W	W	W	NR	W	DT	W	W	W	W	W
1467	W	W	W	W	W	W	W	NR	W	DT	W	W	W	W	W
1468	W	W	W	W	W	W	W	NR	W	W	W	W	W	W	W
1469	W	W	W	W	W	W	W	NR	W	W	W	W	W	W	W
1470	W	W	W	W	W	W	W	NR	W	W	W	W	W	W	W
1471	W	W	W	W	W	W	W	NR	W	W	W	W	W	W	W
1472	W	W	W	W	W	W	W	NR	W	W	W	W	W	W	W
1473	W	W	W	W	W	W	W	NR	W	W	W	W	W	W	W
1474	W	W	W	W	W	W	W	NR	W	W	W	W	W	W	W
1475	W	W	W	W	W	W	W	NR	W	W	W	W	W	W	W
1476	W	W	W	W	W	W	W	NR	W	W	W	W	W	W	W
1477	W	W	W	W	W	W	W	NR	W	W	W	W	W	W	W
1478	W	W	W	W	W	W	W	NR	W	W	W	W	W	W	W
1479	W	W	W	W	W	W	W	NR	W	W	W	W	W	W	W
1480	W	W	W	W	W	W	W	NR	DT	W	W	W	W	W	W
1481	W	W	W	W	W	W	W	NR	DT	W	W	W	W	W	W
1482	W	W	W	W	W	W	W	NR	DT	W	W	W	W	W	W
1483	W	W	W	W	W	W	W	W	W	W	W	W	W	W	W
1484	W	W	W	W	W	W	W	W	W	W	W	W	W	W	W
1485	W	W	W	W	W	W	W	W	W	W	W	W	W	W	W
1486	W	W	W	W	W	W	W	W	W	W	W	W	W	W	W
1487	W	W	W	W	W	W	W	W	W	W	W	W	W	W	W
1488	W	W	W	W	W	W	W	W	W	W	W	W	W	W	W
1489	W	W	W	W	W	W	W	NR	W	W	W	W	W	W	W
1490	W	W	W	W	W	W	W	NR	W	W	W	W	W	W	W
1491	W	W	W	W	W	W	W	NR	W	W	W	W	W	W	W
1492	W	W	W	W	W	W	W	NR	W	W	W	W	W	W	W
1493	W	W	W	W	W	W	W	NR	W	W	W	W	W	W	W
1494	W	W	W	W	W	W	W	NR	W	W	W	W	W	W	W
1495	W	W	W	W	W	W	W	NR	W	W	W	W	W	W	W
1496	W	W	W	W	W	W	W	NR	DT	W	W	W	W	W	W
1497	W	W	W	W	W	W	W	NR	DT	W	W	W	W	W	W
1498	W	W	W	W	W	W	W	NR	DT	W	W	W	W	W	W
1499	W	W	W	W	W	W	W	NR	DT	W	W	W	W	W	W
1500	W	W	W	W	W	W	W	NR	W	W	W	W	W	W	W
1501	W	W	W	W	W	W	W	NR	W	W	W	W	W	W	W
1502	W	W	W	W	W	W	W	NR	W	W	W	W	W	W	W
1503	W	W	W	W	W	W	W	NR	W	W	W	W	W	W	W
1504	W	W	W	W	W	W	W	NR	W	W	W	W	W	W	W
1505	W	W	W	W	W	W	W	NR	W	W	W	W	W	W	W
1506	W	W	W	W	W	W	W	NR	W	W	W	W	W	W	W
1507	W	W	W	W	W	W	W	NR	W	W	W	W	W	W	W
1508	W	W	W	W	W	W	W	NR	W	W	W	W	W	W	W
1509	W	W	W	W	W	W	W	NR	W	DT	W	W	W	W	W
1510	W	W	W	W	W	W	W	NR	W	DT	W	W	W	W	W
1511	W	W	W	W	W	W	W	NR	W	DT	W	W	W	W	W
1512	W	W	W	W	W	W	W	NR	W	DT	W	W	W	W	W
1513	W	W	W	W	W	W	W	NR	W	DT	W	W	W	W	W
1514	W	W	W	W	W	W	W	NR	W	W	W	W	W	W	W
1515	W	W	W	W	W	W	W	NR	W	W	W	W	W	W	W
1516	W	W	W	W	W	W	W	NR	W	W	W	W	W	W	W
1517	W	W	W	W	W	W	W	NR	W	W	W	W	W	W	W
1518	W	W	W	W	W	W	W	NR	W	W	W	W	W	W	W
1519	W	W	W	W	W	W	W	NR	W	W	W	W	W	W	W
1520	W	W	W	W	W	W	W	NR	W	W	W	W	W	W	W
1521	W	W	W	W	W	W	W	NR	W	W	W	W	W	W	W
1522	W	W	W	W	W	W	W	NR	W	W	W	W	W	W	W
1523	W	W	W	W	W	W	W	NR	W	W	W	W	W	W	W
1524	W	W	W	W	W	W	W	NR	W	W	W	W	W	W	W
1525	W	W	W	W	W	W	W	NR	W	W	W	W	W	W	W
1526	W	W	W	W	W	W	W	W	W	W	W	W	W	W	W
1527	W	W	W	W	W	W	W	W	W	W	W	W	W	W	W
1528	W	W	W	W	W	W	W	W	W	W	W	W	W	W	W
1529	W	W	W	W	W	W	W	W	W	W	W	W	W	W	W
1530	W	W	W	W	W	W	W	W	W	DT	W	W	W	W	W
1531	W	W	W	W	W	W	W	W	W	DT	W	W	W	W	W
1532	W	W	W	W	W	W	W	W	W	DT	W	W	W	W	W
1533	W	W	W	W	W	W	W	W	W	DT	W	W	W	W	W
1534	W	W	W	W	W	W	W	W	W	W	W	W	W	W	W
1535	W	W	W	W	W	W	W	W	DT	W	W	W	W	W	W
1536	W	W	W	W	W	W	W	W	DT	W	W	W	W	W	W
1537	W	W	W	W	W	W	W	W	DT	W	W	W	W	W	W
1538	W	W	W	W	W	W	W	W	DT	W	W	W	W	W	W
1539	W	W	W	W	W	W	W	W	DT	W	W	W	W	W	W
1540	W	W	W	W	W	W	W	W	DT	W	W	W	W	W	W
1541	W	W	W	W	W	W	W	W	DT	W	W	W	W	W	W
1542	W	W	W	W	W	W	W	W	DT	C	W	W	W	W	W
1543	W	W	W	W	W	W	W	W	DT	C	W	W	W	W	W
1544	W	W	W	W	W	W	W	W	DT	C	W	W	W	W	W
1545	W	W	W	W	W	W	W	W	W	C	W	W	W	W	W
1546	W	W	W	W	W	W	W	W	W	C	W	W	W	W	W
1547	W	W	W	W	W	W	W	W	W	C	W	W	W	W	W
1548	W	W	W	W	W	W	W	W	W	C	W	W	W	W	W
1549	W	W	W	W	W	W	W	W	W	C	W	W	W	W	W
1550	W	W	W	W	W	W	W	W	W	C	W	W	W	W	W
1551	W	W	W	W	W	W	W	W	W	C	W	W	W	W	W
1552	W	W	W	W	W	W	W	W	DT	C	W	W	W	W	W
1553	W	W	W	W	W	W	W	W	DT	C	W	W	W	W	W
1554	W	W	W	W	W	W	W	W	DT	C	W	W	W	W	W
1555	W	W	W	W	W	W	W	W	DT	C	W	W	W	W	W
1556	W	W	W	W	W	W	W	W	DT	C	W	W	W	W	W
1557	W	W	W	W	W	W	W	W	DT	C	W	W	W	W	NR
1558	W	W	W	W	W	W	W	W	DT	C	W	W	W	W	NR
1559	W	W	W	W	W	W	W	W	W	C	W	W	W	W	NR
1560	W	W	W	W	W	W	W	W	W	C	W	W	W	W	NR
1561	W	W	W	W	W	W	W	C	W	C	W	W	W	W	W
1562	W	W	W	W	W	W	W	C	W	C	W	W	W	W	W
1563	W	W	W	W	W	W	W	C	W	C	W	W	W	W	W
1564	W	W	W	W	W	W	W	C	W	C	W	W	W	W	W
1565	W	W	W	W	W	W	W	C	W	C	W	W	W	W	W
1566	W	W	W	W	W	W	W	C	W	C	W	W	W	W	W
1567	W	W	W	W	W	W	W	C	W	C	W	W	W	W	W
1568	W	W	W	W	W	W	W	C	W	C	W	W	W	W	W
1569	W	W	W	W	W	W	W	C	W	W	W	W	W	W	W
1570	W	W	W	W	W	W	W	C	W	W	W	W	W	W	W
1571	W	W	W	W	W	W	W	C	W	W	W	W	W	W	W
1572	W	W	W	W	W	W	W	C	W	W	W	W	W	W	W
1573	W	W	W	W	W	W	W	C	W	W	W	W	W	W	W
1574	W	W	W	W	W	W	W	W	W	W	W	W	W	W	W
1575	W	W	W	W	W	W	W	W	W	W	W	W	W	W	W
1576	W	W	W	W	W	W	W	W	W	W	W	W	W	W	W
1577	W	W	W	W	W	W	W	W	W	W	W	W	W	W	W
1578	W	W	W	W	W	W	W	W	W	W	W	W	W	W	W
1579	W	W	W	W	W	W	W	W	W	W	W	W	W	W	W
1580	W	W	W	W	W	W	W	W	W	W	W	W	W	W	W
1581	W	W	W	W	W	W	W	W	W	W	W	W	W	W	W
1582	W	W	W	W	W	W	W	W	W	W	W	W	W	W	W
1583	W	W	W	W	W	W	W	W	W	W	W	W	W	W	W
1584	W	W	W	W	W	W	W	NR	W	W	W	W	W	W	W
1585	W	W	W	W	W	W	W	NR	W	W	W	W	W	W	W
1586	W	W	W	W	W	W	W	NR	W	W	W	W	W	W	W
1587	W	W	W	W	W	W	W	NR	W	W	W	W	W	W	W
1588	W	W	W	W	W	W	W	NR	W	W	W	W	W	W	W
1589	W	W	W	W	W	W	W	NR	W	W	W	W	W	W	W
1590	W	W	W	W	W	W	W	NR	W	W	W	W	W	W	W
1591	W	W	W	W	W	W	W	NR	W	W	W	W	W	W	W
1592	W	W	W	W	W	W	W	NR	W	W	W	W	W	W	W
1593	W	W	W	W	W	W	W	NR	W	W	W	W	W	W	W
1594	W	W	W	W	W	W	W	NR	W	W	W	W	W	W	W
1595	W	W	W	W	W	W	W	NR	W	W	W	W	W	W	W
1596	W	W	W	W	W	W	W	NR	W	W	W	W	W	W	W
1597	W	W	W	W	W	W	W	NR	W	W	W	W	W	W	W
1598	W	W	W	W	W	W	W	NR	W	W	W	W	W	W	W
1599	W	W	W	W	W	W	W	NR	W	W	W	W	W	W	W
1600	W	W	W	W	W	W	W	NR	DT	W	W	W	W	W	W
1601	W	W	W	W	W	W	W	NR	DT	W	W	W	W	W	W
1602	W	W	W	W	W	W	W	NR	DT	W	W	W	W	W	W
1603	W	W	W	W	W	W	W	NR	W	W	W	W	W	W	W
1604	W	W	W	W	W	W	W	NR	W	W	W	W	W	W	W
1605	W	W	W	W	W	W	W	NR	W	W	W	W	W	W	W
1606	W	W	W	W	W	W	W	NR	W	W	W	W	W	W	W
1607	W	W	W	W	W	W	W	NR	W	W	W	W	W	W	W
1608	W	W	W	W	W	W	W	NR	W	W	W	W	W	W	W
1609	W	W	W	W	W	W	W	NR	W	W	W	W	W	W	W
1610	W	W	W	W	W	W	W	NR	W	W	W	W	W	W	W
1611	W	W	W	W	W	W	W	NR	W	W	W	W	W	W	W
1612	W	W	W	W	W	W	W	NR	W	W	W	W	W	W	W
1613	W	W	W	W	W	W	W	NR	W	W	W	W	W	W	W
1614	W	W	W	W	W	W	W	NR	W	W	W	W	W	W	W
1615	W	W	W	W	W	W	W	NR	W	W	W	W	W	W	W
1616	W	W	W	W	W	W	W	NR	W	W	W	W	W	W	W
1617	W	W	W	W	W	W	W	NR	W	W	W	W	W	W	W
1618	W	W	W	W	W	W	W	NR	W	W	W	W	W	W	W
1619	W	W	W	W	W	W	W	NR	W	W	W	W	W	W	W
1620	W	W	W	W	W	W	W	NR	DT	W	W	W	W	W	W
1621	W	W	W	W	W	W	W	NR	DT	W	W	W	W	W	W
1622	W	W	W	W	W	W	W	NR	DT	W	W	W	W	W	W
1623	W	W	W	W	W	W	W	NR	W	W	W	W	W	W	W
1624	W	W	W	W	W	W	W	NR	W	W	W	W	W	W	W
1625	W	W	W	W	W	W	W	NR	W	W	W	W	W	W	W
1626	W	W	W	W	W	W	W	NR	W	W	W	W	W	W	W
1627	W	W	W	W	W	W	W	NR	W	W	W	W	W	W	W
1628	W	W	W	W	W	W	W	NR	W	W	W	W	W	W	W
1629	W	W	W	W	W	W	W	NR	W	W	W	W	W	W	W
1630	W	W	W	W	W	W	DT	NR	W	W	W	W	W	W	W
1631	W	W	W	W	W	W	DT	NR	W	W	W	W	W	W	W
1632	W	W	W	W	W	W	DT	NR	W	W	W	W	W	W	W
1633	W	W	W	W	W	W	DT	NR	W	W	W	W	W	W	W
1634	W	W	W	W	W	W	W	NR	W	W	W	W	W	W	W
1635	W	W	W	W	W	W	W	NR	W	W	W	W	W	W	C
1636	W	W	W	W	W	W	W	W	W	W	W	W	W	W	C
1637	W	W	W	W	W	W	W	W	W	W	W	W	W	W	C
1638	W	W	W	W	W	W	W	W	W	W	W	W	W	W	C
1639	W	W	W	W	W	W	W	NR	W	W	W	W	W	W	C
1640	W	W	W	W	W	W	W	NR	W	W	W	W	W	W	C
1641	W	W	W	W	W	W	W	NR	W	W	W	W	W	W	C
1642	W	W	W	W	W	W	W	NR	W	W	W	W	W	W	W
1643	W	W	W	W	W	W	W	NR	W	W	W	W	W	W	W
1644	W	W	W	W	W	W	W	NR	W	W	W	W	W	W	W
1645	W	W	W	W	W	W	W	NR	W	W	W	W	W	W	W
1646	W	W	W	W	W	W	W	NR	W	W	W	W	W	W	W
1647	W	W	W	W	W	W	W	NR	W	W	W	W	W	W	W
1648	W	W	W	W	W	W	W	NR	W	W	W	W	W	W	W
1649	W	W	W	W	W	W	W	NR	W	W	NR	W	W	W	W
1650	W	W	W	W	W	W	W	NR	W	W	W	W	W	W	W
1651	W	W	W	W	W	W	W	NR	W	W	W	W	W	W	W
1652	W	W	W	W	W	W	W	NR	W	W	W	W	W	W	W
1653	W	W	W	W	W	W	W	NR	W	W	W	W	W	W	W
1654	W	W	W	W	W	W	W	NR	W	W	W	W	W	W	W
1655	W	W	W	W	W	W	W	NR	W	W	W	W	W	W	W
1656	W	W	W	W	W	W	W	R	W	W	W	W	W	W	W
1657	W	W	W	W	W	W	W	R	W	W	W	W	W	W	W
1658	W	W	W	W	W	W	W	R	W	W	W	W	W	W	W
1659	W	W	W	W	W	W	W	W	W	W	W	W	W	W	W
1660	W	W	W	W	W	W	W	W	W	W	W	W	W	W	W
1661	W	W	W	W	W	W	W	W	W	W	W	W	W	W	W
1662	W	W	W	W	W	W	W	W	W	W	W	W	W	W	W
1663	W	W	W	W	W	W	W	W	W	W	W	W	W	W	W
1664	W	W	W	W	W	W	W	W	W	W	W	W	W	W	W
1665	W	W	W	W	W	W	W	W	W	W	W	W	W	W	W
1666	W	W	W	W	W	W	W	W	W	W	W	W	W	W	W
1667	W	W	W	W	W	W	W	W	W	W	W	W	W	W	W
1668	W	W	W	W	W	W	W	W	W	W	W	W	W	W	W
1669	W	W	W	W	W	W	W	W	W	W	W	W	W	W	W
1670	W	W	W	W	W	W	W	W	W	W	W	W	W	W	W
1671	W	W	W	W	W	W	W	W	W	W	W	W	W	W	W
1672	W	W	W	W	W	W	W	W	W	W	W	W	W	W	W
1673	W	W	W	W	W	W	W	W	W	W	W	W	W	W	W
1674	W	W	W	W	W	W	W	W	W	W	W	W	W	W	W
1675	W	W	W	W	W	W	W	W	W	W	W	W	W	W	W
1676	W	W	W	W	W	W	W	W	W	W	W	W	W	W	W
1677	W	W	W	W	W	W	W	W	W	W	W	W	W	W	W
1678	W	W	W	W	W	W	W	W	W	W	W	W	W	W	W
1679	W	W	W	W	W	W	W	W	W	DT	W	W	W	W	W
1680	W	W	W	W	W	W	W	W	C	DT	W	W	W	W	W
1681	W	W	W	W	W	W	W	W	C	DT	W	W	W	W	W
1682	W	W	W	W	W	W	W	W	C	DT	W	W	W	W	W
1683	W	W	W	W	W	W	W	W	W	DT	W	W	W	W	W
1684	W	W	W	W	W	W	W	W	W	DT	W	W	W	W	W
1685	W	W	W	W	W	W	W	W	W	W	W	W	W	W	W
1686	W	W	W	W	W	W	DT	W	W	W	W	W	W	W	W
1687	W	W	W	W	W	W	DT	W	W	W	W	W	W	W	W
1688	W	W	W	W	W	W	DT	W	W	W	W	W	W	W	W
1689	W	W	W	W	W	W	DT	W	W	W	W	W	W	W	W
1690	W	W	W	W	W	W	DT	W	W	W	W	W	W	W	W
1691	W	W	W	W	W	W	W	W	W	W	W	W	W	W	W
1692	W	W	W	W	W	W	W	W	W	W	W	W	W	W	W
1693	W	W	W	W	W	W	W	W	W	W	W	W	W	W	W
1694	W	W	W	W	W	W	W	W	W	W	W	W	W	W	W
1695	W	W	W	W	W	W	W	W	W	W	W	W	W	W	W
1696	W	W	W	W	W	W	W	W	W	W	W	W	W	W	W
1697	W	W	W	W	W	W	W	W	W	W	W	W	W	W	W
1698	W	W	W	W	W	W	W	W	DT	W	W	W	W	W	W
1699	W	W	W	W	W	W	W	W	DT	W	W	W	W	W	W
1700	W	W	W	W	W	W	W	W	DT	W	W	W	W	W	W
1701	W	W	W	W	W	W	W	W	DT	W	W	W	W	W	W
1702	W	W	W	W	W	W	W	W	DT	W	W	W	W	W	W
1703	W	W	W	W	W	W	W	W	DT	W	W	W	W	W	W
1704	W	W	W	W	W	W	W	W	DT	W	W	W	W	W	W
1705	W	W	W	W	W	W	W	W	W	W	W	W	W	W	W
1706	W	W	W	W	W	W	W	W	W	W	W	W	W	W	W
1707	W	W	W	W	W	W	W	W	W	W	W	W	W	W	W
1708	W	W	W	W	W	W	W	W	W	W	W	W	W	W	W
1709	W	W	W	W	W	W	W	W	W	W	W	W	W	W	W
1710	W	W	W	W	W	W	W	W	W	W	W	W	W	W	W
1711	W	W	W	W	W	W	W	W	W	W	W	W	W	W	W
1712	W	W	W	W	W	W	W	W	W	W	W	W	W	W	W
1713	W	W	W	W	W	W	W	W	W	W	W	W	W	W	W
1714	W	W	W	W	W	W	W	W	W	W	W	W	W	W	W
1715	W	W	W	W	W	W	W	W	W	W	W	W	W	W	W
1716	W	W	W	W	W	W	W	W	W	W	W	W	W	W	W
1717	W	W	W	W	W	W	W	W	W	W	W	W	W	W	W
1718	W	W	W	W	W	W	W	W	W	W	W	W	W	W	W
1719	W	W	W	W	W	W	W	W	W	W	W	W	W	W	W
1720	W	W	W	W	W	W	W	W	W	W	W	W	W	W	W
1721	W	W	W	W	W	W	W	DT	W	W	W	W	W	W	W
1722	W	W	W	W	W	W	W	DT	W	W	W	W	W	W	W
1723	W	W	W	W	W	W	W	DT	W	W	W	W	W	W	W
1724	W	W	W	W	W	W	W	W	W	DT	W	W	W	W	W
1725	W	W	W	W	W	W	W	W	W	DT	W	W	W	W	W
1726	W	W	W	W	W	W	W	W	W	DT	W	W	W	W	W
1727	W	W	W	W	W	W	W	W	W	DT	W	W	W	W	W
1728	W	W	W	W	W	W	W	W	W	DT	W	W	W	W	W
1729	W	W	W	W	W	W	W	W	W	DT	W	W	W	W	W
1730	W	W	W	W	W	W	W	W	W	W	W	W	W	W	W
1731	W	W	W	W	W	W	W	W	W	W	W	W	W	W	W
1732	W	W	W	W	W	W	W	W	W	W	W	W	W	W	W
1733	W	W	W	W	W	W	W	W	W	W	W	W	W	W	W
1734	W	W	W	W	W	W	W	W	W	W	W	W	W	W	W
1735	W	W	W	W	W	W	W	W	W	W	W	W	W	W	W
1736	W	W	W	W	W	W	W	W	W	W	W	W	W	W	W
1737	W	W	W	W	W	W	W	W	DT	W	W	W	W	W	W
1738	W	W	W	W	W	W	W	W	DT	W	W	W	W	W	W
1739	W	W	W	W	W	W	DT	W	DT	W	W	W	W	W	W
1740	W	W	W	W	W	W	DT	W	DT	W	W	W	W	W	W
1741	W	W	W	W	W	W	DT	W	DT	W	W	W	W	W	W
1742	W	W	W	W	W	W	W	W	DT	W	W	W	W	W	W
1743	W	W	W	W	W	W	W	W	W	W	W	W	W	W	W
1744	W	W	W	W	W	W	W	W	W	W	W	W	W	W	W
1745	W	W	W	W	W	W	W	W	W	W	W	W	W	W	W
1746	W	W	W	W	W	W	W	W	W	W	W	W	W	W	W
1747	W	W	W	W	W	W	W	W	W	W	W	W	W	W	W
1748	W	W	W	W	W	W	W	W	W	W	W	W	W	W	W
1749	W	W	W	W	W	W	W	W	W	DT	W	W	W	W	W
1750	W	W	W	W	W	W	W	W	W	DT	W	W	W	W	W
1751	W	W	W	W	W	W	W	W	W	DT	W	W	W	W	W
1752	W	W	W	W	W	W	W	W	W	W	W	W	W	W	W
1753	W	W	W	W	W	W	W	W	W	W	W	W	W	W	W
1754	W	W	W	W	W	W	W	W	W	W	W	W	W	W	W
1755	W	W	W	W	W	W	W	W	W	W	W	W	W	W	W
1756	W	NR	W	W	W	W	W	W	W	W	W	W	W	W	W
1757	R	NR	W	W	W	W	W	W	W	W	W	W	W	W	W
1758	W	NR	W	W	W	W	W	W	W	W	W	W	W	W	W
1759	W	NR	W	W	W	W	W	W	W	W	W	W	W	W	W
1760	W	NR	W	W	W	W	W	W	W	W	W	W	W	W	W
1761	W	W	W	W	W	W	W	W	W	W	W	W	W	W	W
1762	W	W	W	W	W	W	W	W	W	W	W	W	W	W	W
1763	W	W	W	W	W	W	W	W	W	W	W	W	W	W	W
1764	W	NR	W	W	W	W	W	W	W	W	W	W	W	W	W
1765	W	NR	W	W	W	W	W	W	W	W	W	W	W	W	W
1766	W	NR	W	W	W	W	W	W	W	W	W	W	W	W	W
1767	W	NR	W	W	W	W	W	W	W	W	W	W	W	W	W
1768	W	NR	W	W	W	W	W	W	W	W	W	W	W	W	W
1769	W	NR	W	W	W	W	W	W	W	W	W	W	W	W	W
1770	W	W	W	W	W	W	W	W	W	W	W	W	W	W	W
1771	W	W	W	W	W	W	W	W	W	W	W	W	W	W	W
1772	W	W	W	W	W	W	W	W	W	W	W	W	W	W	W
1773	W	NR	W	W	W	W	W	W	W	W	W	W	W	W	W
1774	W	NR	W	W	W	W	W	W	W	W	W	W	W	W	W
1775	W	NR	W	W	W	W	W	W	W	W	W	W	W	W	W
1776	W	W	W	W	W	W	W	W	W	W	W	W	W	W	W
1777	W	W	W	W	W	W	W	W	W	W	W	W	W	W	W
1778	W	W	W	W	W	W	W	W	W	W	W	W	W	W	W
1779	W	W	W	W	W	W	W	W	W	W	W	W	W	W	W
1780	W	W	W	W	W	W	W	W	W	W	W	W	W	W	W
1781	W	W	W	W	W	W	W	W	W	W	W	W	W	W	W
1782	W	W	W	W	W	W	W	W	W	W	W	W	W	W	W
1783	W	W	W	W	W	W	W	W	W	W	W	W	W	W	W
1784	W	W	W	W	W	W	W	W	W	W	W	W	W	W	W
1785	W	W	W	W	W	W	W	W	W	W	W	W	W	W	W
1786	W	W	W	W	W	W	W	W	W	W	W	W	W	W	W
1787	W	W	W	W	W	W	W	W	W	W	W	W	W	W	W
1788	W	W	W	W	W	W	W	W	W	W	W	W	W	W	W
1789	W	W	W	W	W	W	W	W	W	W	W	W	W	W	W
1790	W	W	W	W	W	W	W	W	W	W	W	W	W	W	W
1791	W	W	W	W	W	W	W	W	W	W	W	W	W	W	W
1792	W	W	W	W	W	W	W	W	W	W	W	W	W	W	W
1793	W	W	W	W	W	W	W	W	W	W	W	W	W	W	W
1794	W	W	W	W	W	W	W	W	W	W	W	W	W	W	W
1795	W	W	W	W	W	W	W	W	W	W	W	W	W	W	W
1796	W	W	W	W	W	W	W	W	W	DT	W	W	W	W	W
1797	W	W	W	W	W	W	W	W	W	DT	W	W	W	W	W
1798	W	W	W	W	W	W	W	W	W	DT	W	W	W	W	W
1799	W	W	W	W	W	W	W	W	W	DT	W	W	W	W	W
1800	W	W	W	W	W	W	W	W	W	W	W	W	W	W	W
1801	W	W	W	W	W	W	W	W	W	W	W	W	W	W	W
1802	W	W	W	W	W	W	W	W	W	W	W	W	W	W	W
1803	W	W	W	W	W	W	W	W	W	W	W	W	W	W	W
1804	W	W	W	W	W	W	W	W	W	W	W	W	W	W	W
1805	W	W	W	W	W	W	W	DT	W	W	W	W	W	W	W
1806	W	W	W	W	W	W	W	DT	W	W	W	W	W	W	W
1807	W	W	W	W	W	W	W	DT	W	W	W	W	W	W	W
1808	W	W	W	W	W	W	W	DT	W	W	W	W	W	W	W
1809	W	W	W	W	W	W	W	DT	W	W	W	W	W	W	W
1810	W	W	W	W	W	W	W	W	W	W	W	W	W	W	W
1811	W	W	W	W	W	W	W	W	W	W	W	W	W	W	W
1812	W	W	W	W	W	W	W	W	W	W	W	W	W	W	W
1813	W	W	W	W	W	W	W	W	W	W	W	W	W	W	W
1814	W	W	W	W	W	W	W	W	W	W	W	W	W	W	W
1815	W	W	W	W	W	W	W	W	W	W	W	W	W	W	W
1816	W	W	W	W	W	W	W	W	W	DT	W	W	W	W	W
1817	W	W	W	W	W	W	W	W	W	DT	W	W	W	W	W
1818	W	W	W	W	W	W	W	W	W	DT	W	W	W	W	W
1819	W	W	W	W	W	W	W	W	W	DT	W	W	W	W	W
1820	W	W	W	W	W	W	W	W	W	DT	W	W	W	W	W
1821	W	W	W	W	W	W	W	W	W	DT	W	W	W	W	W
1822	W	W	W	W	W	W	W	W	W	W	W	W	W	W	W
1823	W	W	W	W	W	W	W	W	W	W	W	W	W	W	C
1824	W	W	W	W	W	W	W	W	W	W	W	W	W	W	C
1825	W	W	W	W	W	W	W	W	W	W	W	W	W	W	C
1826	W	W	W	W	W	W	W	W	W	W	W	W	W	W	C
1827	W	W	W	W	W	W	W	W	W	W	W	W	W	W	C
1828	W	W	W	W	W	W	W	W	W	W	W	W	W	W	C
1829	W	W	W	W	W	W	W	W	W	W	W	W	W	W	C
1830	W	W	W	W	W	W	W	W	W	W	W	W	W	W	C
1831	W	W	W	W	W	W	W	W	W	W	W	W	W	W	C
1832	W	W	W	W	W	W	W	W	W	W	W	W	W	W	C
1833	W	W	W	W	W	W	W	W	W	W	W	W	W	W	C
1834	W	W	W	W	W	W	W	W	W	W	W	W	W	W	C
1835	W	W	W	W	W	W	W	W	W	W	W	W	W	W	C
1836	W	W	W	W	W	W	W	W	W	DT	W	W	W	W	W
1837	W	W	W	W	W	W	W	W	W	DT	W	W	W	W	W
1838	W	W	W	W	W	W	W	W	W	DT	W	W	W	W	W
1839	W	W	W	W	W	W	W	W	W	W	W	W	W	W	W
1840	W	W	W	W	W	W	W	W	W	W	W	W	W	W	W
1841	W	W	W	W	W	W	W	W	W	W	W	W	W	W	W
1842	W	W	W	W	W	W	W	W	W	W	W	W	W	W	W
1843	W	W	W	W	W	W	W	W	W	W	W	W	W	W	W
1844	W	W	W	W	W	W	W	W	W	W	W	W	W	W	W
1845	W	W	W	W	W	W	W	W	W	W	W	W	W	W	W
1846	W	W	W	W	W	W	W	W	W	W	W	W	W	W	W
1847	W	W	W	W	W	W	W	W	W	W	W	W	W	W	W
1848	W	W	W	W	W	W	W	W	W	W	W	W	W	W	W
1849	W	W	W	W	W	W	W	W	W	W	W	W	W	W	W
1850	W	W	W	W	W	W	W	W	W	W	W	W	W	W	W
1851	W	W	W	W	W	W	NR	W	W	W	W	W	W	W	W
1852	W	W	W	W	W	W	NR	W	W	W	W	W	W	W	W
1853	W	W	W	W	W	W	NR	W	W	W	W	W	W	W	W
1854	W	W	W	W	W	W	NR	W	DT	W	W	W	W	W	W
1855	W	W	W	W	W	W	NR	W	DT	W	W	W	W	W	W
1856	W	W	W	W	W	W	W	W	DT	W	W	W	W	W	W
1857	W	W	W	W	W	W	W	W	DT	W	W	W	W	W	W
1858	W	W	W	W	W	W	W	W	DT	W	W	W	W	W	W
1859	W	W	W	W	W	W	NR	W	W	W	W	W	W	W	W
1860	W	W	W	W	W	W	NR	W	W	W	W	W	W	W	W
1861	W	W	W	W	W	W	NR	W	W	W	W	W	W	W	W
1862	W	W	W	W	W	W	NR	W	W	W	W	W	W	W	W
1863	W	W	W	W	W	W	NR	W	W	W	W	W	W	W	W
1864	W	W	W	W	W	W	NR	W	W	W	W	W	W	W	W
1865	W	W	W	W	W	W	NR	W	W	W	W	W	W	W	W
1866	W	W	W	W	W	W	NR	W	DT	W	W	W	W	W	W
1867	W	W	W	W	W	W	NR	W	DT	W	W	W	W	W	W
1868	W	W	W	W	W	W	NR	W	DT	W	W	W	W	W	W
1869	W	W	W	W	W	W	NR	W	DT	W	W	W	W	W	W
1870	W	W	W	W	W	W	NR	W	DT	W	W	W	W	W	W
1871	W	W	W	W	W	W	NR	W	DT	W	W	W	W	W	W
1872	W	W	W	W	W	W	NR	W	W	W	W	W	W	W	W
1873	W	W	W	W	W	W	W	W	W	W	W	W	W	W	W
1874	W	W	W	W	W	W	W	W	W	W	W	W	W	W	W
1875	W	W	W	W	W	W	W	W	W	W	W	W	W	W	W
1876	W	W	W	W	W	W	W	W	W	W	W	W	W	W	W
1877	W	W	W	W	W	W	W	W	W	W	W	W	W	W	W
1878	W	W	W	W	W	W	W	W	W	W	W	W	W	W	W
1879	W	W	W	W	W	W	W	W	W	W	W	W	W	W	W
1880	W	W	W	W	W	W	W	W	W	W	W	W	W	W	W
1881	W	W	W	W	W	W	W	W	W	W	W	W	W	W	W
1882	W	W	W	W	W	W	W	W	W	W	W	W	W	W	W
1883	W	W	W	W	W	W	W	W	W	W	W	W	W	W	W
1884	W	W	W	W	W	W	W	W	W	W	W	W	W	W	W
1885	W	W	W	W	W	W	W	W	W	W	W	W	W	W	W
1886	W	W	W	W	W	W	W	W	W	DT	W	W	W	W	W
1887	W	W	W	W	W	W	W	W	W	DT	W	W	W	W	W
1888	W	W	W	W	W	W	W	W	W	DT	W	W	W	W	W
1889	W	W	W	W	W	W	W	W	W	DT	W	W	W	W	W
1890	W	W	W	W	W	W	W	W	W	DT	W	W	W	W	W
1891	W	W	W	W	W	W	W	W	W	W	W	W	W	W	W
1892	W	W	W	W	W	W	W	W	W	W	W	W	W	W	W
1893	W	W	W	W	W	W	W	W	W	W	W	W	W	W	W
1894	W	W	W	W	W	W	W	W	W	W	W	W	W	W	W
1895	W	W	W	W	W	W	W	W	W	W	W	W	W	W	W
1896	W	W	W	W	W	W	W	W	W	W	W	W	W	W	W
1897	W	W	W	W	W	W	W	W	W	W	W	W	W	W	W
1898	W	W	W	W	W	W	W	W	W	W	W	W	W	W	W
1899	W	W	W	W	W	W	W	W	W	W	W	W	W	W	W
1900	W	W	W	W	W	W	W	W	W	W	W	W	W	W	W
1901	W	W	W	W	W	W	W	W	W	W	W	W	W	W	W
1902	W	W	W	W	W	W	W	W	W	W	W	W	W	W	W
1903	W	W	W	W	W	W	W	W	W	W	W	W	W	W	W
1904	W	W	W	W	W	W	W	W	W	W	W	W	W	W	W
1905	W	W	W	W	W	W	W	W	W	W	W	W	W	W	W
1906	W	W	W	W	W	W	W	W	W	W	W	W	W	W	W
1907	W	W	W	W	W	W	W	W	W	W	W	W	W	W	W
1908	W	W	W	W	W	W	W	W	W	W	W	W	W	W	W
1909	W	W	W	W	W	W	W	W	W	W	W	W	W	W	W
1910	W	W	W	W	W	W	W	W	W	W	W	W	W	W	W
1911	W	W	W	W	W	W	W	W	W	W	W	W	W	W	W
1912	W	W	W	W	W	W	W	W	W	W	W	NR	W	W	W
1913	W	W	W	W	W	W	W	W	W	DT	W	NR	W	W	W
1914	W	W	W	W	W	W	W	W	W	DT	W	NR	W	W	W
1915	W	W	W	W	W	W	W	W	W	DT	W	NR	W	W	W
1916	W	W	W	W	W	W	W	W	W	W	W	NR	W	W	W
1917	W	W	W	W	W	W	W	W	W	W	W	NR	W	W	W
1918	W	W	W	W	W	W	W	W	W	W	W	W	W	W	W
1919	W	W	W	W	W	W	W	W	W	W	W	W	W	W	W
1920	W	W	W	W	W	W	W	W	W	W	W	W	W	W	W
1921	W	W	W	W	W	W	W	W	W	W	W	NR	W	W	W
1922	W	W	W	W	W	W	W	W	W	W	W	NR	W	W	W
1923	W	W	W	W	W	W	W	W	W	W	W	NR	W	W	W
1924	W	W	W	W	W	W	W	W	DT	W	W	NR	W	W	W
1925	W	W	W	W	W	W	W	W	DT	W	W	NR	W	W	W
1926	W	W	W	W	W	W	W	W	DT	W	W	NR	W	W	W
1927	W	W	W	W	W	W	W	W	W	W	W	NR	W	W	W
1928	W	W	W	W	W	W	W	W	W	DT	W	W	W	W	W
1929	W	W	W	W	W	W	W	W	W	DT	W	W	W	W	W
1930	W	W	W	W	W	W	W	W	W	DT	W	W	W	W	W
1931	W	W	W	W	W	W	W	W	W	DT	W	W	W	W	W
1932	W	W	W	W	W	W	W	W	W	DT	W	W	W	W	W
1933	W	W	W	W	W	W	W	W	W	W	W	W	W	W	W
1934	W	W	W	W	W	W	W	W	W	W	W	W	W	W	W
1935	W	W	W	W	W	W	W	W	W	W	W	W	W	W	W
1936	W	W	W	W	W	W	W	W	W	W	W	W	W	W	W
1937	W	W	W	W	W	W	W	W	DT	W	W	W	W	W	W
1938	W	W	W	W	W	W	W	W	DT	W	W	W	W	W	W
1939	W	W	W	W	W	W	W	W	DT	W	W	W	W	W	W
1940	W	W	W	W	W	W	W	W	DT	W	W	W	W	W	W
1941	W	W	W	W	W	W	W	W	DT	W	W	W	W	W	W
1942	W	W	W	W	W	W	W	W	DT	W	W	W	W	W	W
1943	W	W	W	W	W	W	W	W	W	W	W	W	W	W	W
1944	W	W	W	W	W	W	W	W	W	C	W	W	W	W	W
1945	W	W	W	W	W	W	W	W	W	C	W	W	W	W	W
1946	W	W	W	W	W	W	W	W	W	C	W	W	W	W	W
1947	W	W	W	W	W	W	W	W	W	C	W	W	W	W	W
1948	W	W	W	W	W	W	W	W	W	C	W	W	W	W	W
1949	W	W	W	W	W	W	W	W	W	C	W	W	W	W	W
1950	W	W	W	W	W	W	W	W	W	C	W	W	W	W	W
1951	W	W	W	W	W	W	W	W	W	W	W	W	W	W	W
1952	W	W	W	W	W	W	W	W	W	W	W	W	W	W	W
1953	W	W	W	W	W	W	W	W	W	W	W	W	W	W	W
1954	W	W	W	W	W	W	W	W	W	W	W	W	W	W	W
1955	W	W	W	W	W	W	W	W	W	W	W	W	W	W	W
1956	W	W	W	W	W	W	W	W	W	W	W	W	W	W	W
1957	W	W	W	W	W	W	W	W	W	W	W	W	W	W	W
1958	W	W	W	W	W	W	W	W	W	W	W	W	W	W	W
1959	W	W	W	W	W	W	W	W	W	W	W	W	W	W	W
1960	W	W	W	W	W	W	W	W	W	W	W	W	W	W	W
1961	W	W	W	W	W	W	W	W	W	W	W	W	W	W	W
1962	W	W	W	W	W	W	W	W	W	W	W	W	W	W	W
1963	W	W	W	W	W	W	W	W	W	W	W	W	W	W	W
1964	W	W	W	W	W	W	W	W	W	W	W	W	W	W	W
1965	W	W	W	W	W	W	W	W	W	W	W	W	W	W	W
1966	W	W	W	W	W	W	W	W	W	W	W	W	W	W	W
1967	W	W	W	W	W	W	W	W	W	W	W	W	W	W	W
1968	W	W	W	W	W	W	W	W	W	W	W	W	W	W	W
1969	W	W	W	W	W	W	W	W	W	W	W	W	W	W	W
1970	W	W	W	W	W	W	W	W	W	W	W	W	W	W	W
1971	W	W	W	W	W	W	W	W	W	W	W	W	W	W	W
1972	W	W	W	W	W	W	W	W	W	W	W	W	W	W	W
1973	W	W	W	W	W	W	W	W	W	W	W	W	W	W	W
1974	W	W	W	W	W	W	W	W	W	W	W	W	W	W	W
1975	W	W	W	W	W	W	W	W	W	W	W	W	W	W	W
1976	W	W	W	W	W	W	W	W	W	W	W	W	W	W	W
1977	W	W	W	W	W	W	W	W	W	W	W	W	W	W	W
1978	W	W	W	W	W	W	W	W	DT	W	W	W	W	W	W
1979	W	W	W	W	W	W	W	W	DT	W	W	W	W	W	W
1980	W	W	W	W	W	W	W	W	DT	W	W	W	W	W	W
1981	W	W	W	W	W	W	W	W	DT	W	W	W	W	W	W
1982	W	W	W	W	W	W	W	W	W	W	W	W	W	W	W
1983	W	W	W	W	W	W	W	W	W	W	W	W	W	W	W
1984	W	W	W	W	W	W	W	W	W	W	W	W	W	W	W
1985	W	W	W	W	W	W	W	W	W	W	W	W	W	W	W
1986	W	W	W	W	W	W	W	W	W	W	W	W	W	W	W
1987	W	W	W	W	W	W	W	W	W	W	W	W	W	W	W
1988	W	W	W	W	W	W	W	W	W	W	W	W	W	W	W
1989	W	W	W	W	W	W	W	W	W	W	W	W	W	W	W
1990	W	W	W	W	W	W	W	W	W	W	W	W	W	W	W
1991	W	W	W	W	W	W	W	W	W	W	W	W	W	W	W
1992	W	W	W	W	W	W	W	W	W	W	W	W	W	W	W
1993	W	W	W	W	W	W	W	W	W	W	W	W	W	W	W
1994	W	W	W	W	W	W	W	W	W	W	W	W	W	W	W
1995	W	W	W	W	W	W	W	W	W	W	W	W	W	W	W
1996	W	W	W	W	W	W	W	W	W	W	W	W	W	W	W
1997	W	W	W	W	W	W	W	W	W	W	W	W	W	W	W
[truncated: 19,602 more rows]

## Sheet: Total time
	OXMC DOX -												OXMC DOX +												OX DOX -
	Dark					Light							Dark					Light							Dark					Light
DOU ab 0W	W	R	S	DT	C	W	R	S	DT	C		control 0w	W	R	S	DT	C	W	R	S	DT	C		OX ab 0W	W	R	S	DT	C	W	R	S	DT	C
N1	30420	1316	11464	0	0	18424	3452	21324	0	0		N1	31664	1584	9952	0	0	17140	3724	22336	0	0		N1	32024	344	10832	0	0	13964	3372	25864	0	0
N2	31600	1296	10304	0	0	17620	3020	22560	0	0		N2	25672	1712	15816	0	0	14844	2784	25572	0	0		N2	33052	772	9376	0	0	12560	3412	27228	0	0
N3	31744	1296	10160	0	0	16804	3892	22504	0	0		N3	34444	1252	7504	0	0	18032	3908	21260	0	0		N3	30304	960	11936	0	0	13964	4616	24620	0	0
N4	27184	1624	14392	0	0	16364	2912	23924	0	0		N4	37220	972	5008	0	0	17096	3580	22524	0	0		N4	33132	1440	8628	0	0	18424	3444	21332	0	0
N5	36040	880	6280	0	0	17776	3156	22268	0	0		N5	36476	868	5856	0	0	17176	3464	22560	0	0		N5	27888	1656	13656	0	0	16160	2400	24640	0	0
N6	30832	1628	10740	0	0	17532	3304	22364	0	0		N6	33388	1200	8612	0	0	16732	3992	22476	0	0		N6	26940	1560	14700	0	0	17648	2816	22736	0	0
N7	36764	572	5864	0	0	17280	3688	22232	0	0		N7	32124	932	10144	0	0	12764	3316	27120	0	0		N7	25140	1528	16532	0	0	15144	2868	25188	0	0
N8	23224	2716	17260	0	0	19144	3744	20312	0	0
	Dark					Light							Dark					Light							Dark					Light
DOU ab 1W	W	R	S	DT	C	W	R	S	DT	C		control 1w	W	R	S	DT	C	W	R	S	DT	C		OX ab 1W	W	R	S	DT	C	W	R	S	DT	C
N1	29324	1628	12148	100	0	18724	4064	20412	0	0		N1	32192	1124	9884	0	0	15756	3600	23844	0	0		N1	30132	1356	11712	0	0	15128	4388	23684	0	0
N2	33452	1312	8088	348	0	17392	3724	22008	76	0		N2	28628	1332	13240	0	0	14552	3112	25536	0	0		N2	35796	700	6704	0	0	14284	4484	24432	0	0
N3	31204	1424	10332	240	0	15900	3628	23592	80	0		N3	26880	1640	14680	0	0	14656	3708	24836	0	0		N3	30776	1016	11408	0	0	14612	3680	24908	0	0
N4	29256	1780	12128	36	0	15768	3912	23520	0	0		N4	27380	1952	13868	0	0	18816	3032	21352	0	0		N4	29296	1268	12636	0	0	17388	3044	22768	0	0
												N5	29308	1404	12488	0	0	17216	2372	23612	0	0
N6	30240	1912	11048	0	0	17144	3892	22164	0	0		N6	32576	848	9776	0	0	18712	3380	21108	0	0
N7	31448	1172	10544	36	0	15496	3784	23920	0	0		N7	34136	844	8220	0	0	16832	3400	22968	0	0
N8	30160	1868	11172	0	0	18408	4172	20620	0	0
	Dark					Light							Dark					Light							Dark					Light
DOU ab 2W	W	R	S	DT	C	W	R	S	DT	C		control 2w	W	R	S	DT	C	W	R	S	DT	C		OX ab 2W	W	R	S	DT	C	W	R	S	DT	C
N1	27888	700	11224	1692	1696	19028	2884	19352	456	1480		N1	30176	1140	11884	0	0	15500	3460	24240	0	0		N1	28424	1380	13260	0	136	15676	3588	23868	0	64
N2	39288	0	576	2660	676	24224	744	15792	1048	1392		N2	28528	1128	13544	0	0	14332	3208	25660	0	0		N2	30876	1076	11006	0	248	13448	3760	25924	0	68
N3	29588	964	10968	916	764	18048	2960	21460	28	704		N3	24148	1552	17500	0	0	14532	2948	25720	0	0		N3	30134	1568	11678	0	130	14384	3864	24876	0	78
N4	28308	2140	12384	40	328	17696	3396	21664	36	408														N4	30340	1456	11172	0	232	18720	2720	21084	0	676
												N6	32460	1204	9536	0	0	16872	3448	22880	0	0
N7	30924	820	7816	3060	580	16060	3336	23200	452	152		N7	34448	924	7828	0	0	16324	3380	23496	0	0
N8	26840	1968	13612	468	312	16688	2776	23092	200	444
	Dark					Light							Dark					Light							Dark					Light
DOU ab 3W	W	R	S	DT	C	W	R	S	DT	C		control 3w	W	R	S	DT	C	W	R	S	DT	C		OX ab 3W	W	R	S	DT	C	W	R	S	DT	C
N1	33160	0	6684	1860	1496	19448	1488	19812	912	1540		N1	30688	928	11584	0	0	15300	3188	24712	0	0		N1	30206	1580	11188	0	444	17266	3588	22032	0	316
N2	40644	0	104	1724	728	22776	108	18108	644	1564		N2	27020	1216	14964	0	0	16568	3120	23512	0	0		N2	31227	1164	10248	0	562	16764	3376	22710	0	340
N3	29444	328	10360	2040	1028	16468	2992	22668	292	780		N3	26284	1748	15168	0	0	15940	3696	23564	0	0		N3	31488	1164	9956	0	592	14758	3740	24556	0	144
N4	27860	1400	11180	1748	1012	20652	1624	19368	352	1204		N4	26416	1600	15184	0	0	16908	2688	23604	0	0		N4	30613	1220	11036	0	540	19534	2164	21096	0	432
												N5	32448	916	9836	0	0	14120	2752	26328	0	0
N6	35712	176	5212	684	1416	19788	1360	20672	100	1280		N6	30048	1700	11452	0	0	20240	3464	19496	0	0
N7	38764	0	212	3428	796	17388	1548	22856	1032	376		N7	31352	816	11032	0	0	16172	2900	24128	0	0
N8	29224	1888	10164	1444	480	18136	2712	21024	536	792
	Dark					Light							Dark					Light							Dark					Light
DOU ab 4W	W	R	S	DT	C	W	R	S	DT	C		control 4w	W	R	S	DT	C	W	R	S	DT	C		OX ab 4W	W	R	S	DT	C	W	R	S	DT	C
N1	35840	104	3524	1580	2152	17912	844	21676	1512	1256		N1	28384	996	13820	0	0	15248	3164	24788	0	0		N1	27018	1432	13996	0	748	18652	2538	21692	0	245
N2	38900	0	1552	1068	1680	21140	112	19648	768	1532		N2	30912	680	11608	0	0	14576	3784	24840	0	0		N2	23877	1646	17166	0	572	13670	2920	26176	0	420
N3	29952	16	8660	2148	2424	18936	1384	19604	740	2536		N3	19820	960	22420	0	0	14096	2252	26852	0	0		N3	27294	1608	13630	0	672	15916	3280	23780	0	224
N4	36200	92	3600	1720	1588	19064	1056	20344	492	2244		N4	28820	1260	13120	0	0	15468	3208	24524	0	0		N4	22342	1451	17188	0	652	18498	2380	21904	0	416
												N5	29088	1244	12868	0	0	15224	2908	25068	0	0
N6	35080	0	4120	1328	2672	18364	1636	22144	536	520		N6	34320	856	8024	0	0	19128	3396	20676	0	0
N7	34792	172	6156	1064	1016	19440	1456	20984	420	900		N7	29140	1204	12856	0	0	18556	2868	21776	0	0
N8	29048	740	10396	1444	1572	20624	2252	18448	712	1164
	W						R						S						DT						C						W						R						S						DT
	double ab		control		oxab		double ab		control		oxab		double ab		control		oxab		double ab		control		oxab		double ab		control		oxab		double ab		control		oxab		double ab		control		oxab		double ab		control		oxab		double ab
	AVE	SEM	AVE	SEM	AVE	SEM	AVE	SEM	AVE	SEM	AVE	SEM	AVE	SEM	AVE	SEM	AVE	SEM	AVE	SEM	AVE	SEM	AVE	SEM	AVE	SEM	AVE	SEM	AVE	SEM	AVE	SEM	AVE	SEM	AVE	SEM	AVE	SEM	AVE	SEM	AVE	SEM	AVE	SEM	AVE	SEM	AVE	SEM	AVE
0W	30976	1552.23	32998.3	1450.6	29782.9	1199.47	1416	224.27	1217.14	123.855	1180	187.302	10808	1339.83	8984.57	1352.96	12237.1	1088.92	0	0	0	0	0	0	0	0	0	0	0	0	17618	309.378	16254.9	688.373	15409.1	802.235	3396	126.577	3538.29	154.508	3275.43	267.126	22186	367.353	23406.9	795.734	24515.4	739.306	0
1W	30726.3	553.429	30157.1	1061.61	31500	1463.69	1585.14	108.881	1306.29	153.954	1085	147.172	10780	521.383	11736.6	921.617	10615	1329.56	108.571	50.8924	0	0	0	0	0	0	0	0	0	0	16976	490.744	16648.6	663.213	15353	700.22	3882.29	71.9304	3229.14	169.458	3899	336.691	22319.4	540.505	23322.3	625.996	23948	467.079	22.2857
2W	30472.7	1855.25	29952	1764.49	29943.5	530.09	1098.67	331.758	1189.6	102.064	1370	105.331	9430	1939.05	12058.4	1674.92	11779	513.934	1472.67	494.95	0	0	0	0	726	207.843	0	0	186.5	31.0846	18624	1197.75	15512	493.046	15557	1149	2682.67	400.844	3288.8	96.3444	3483	260.622	20760	1145.46	24399.2	569.351	23938	1039.8	370
3W	33544	1891.63	29179.4	965.069	30883.5	290.917	541.714	293.133	1274.86	152.24	1282	100.206	6273.71	1772.87	12745.7	861.339	10607	299.205	1846.86	311.559	0	0	0	0	993.714	138.506	0	0	534.5	31.9935	19236.6	804.352	16464	718.384	17080.5	980.997	1690.29	359.12	3115.43	140.156	3217	358.848	20644	652.585	23620.6	783.858	22598.5	731.589	552.571
4W	34258.9	1331.57	28640.6	1660.22	25132.8	1210.73	160.571	99.5511	1028.57	82.7776	1534.25	54.2469	5429.71	1188.82	13530.9	1648.86	15495	973.983	1478.86	144.833	0	0	0	0	1872	216.21	0	0	661	36.1617	19354.3	439.924	16042.3	746.559	16684	1184.54	1248.57	254.057	3082.86	181.198	2779.5	201.693	20406.9	488.511	24074.9	799.279	23388	1041.04	740
		Dark															Light
		W	R	S	DT	C											W	R	S	DT	C
0	OXMC DOX- vs OXMC DOX +	0.97395	1	0.96325	-	-									0	OXMC DOX- vs OXMC DOX +	0.38662	1	0.56865	-	-
	OXMC DOX- vs OX DOX -	1	1	1	-	-										OXMC DOX- vs OX DOX -	0.05593	1	0.05319	-	-
	OXMC DOX+ vs OX DOX -	0.40815	1	0.28368	-	-										OXMC DOX+ vs OX DOX -	1	1	0.73892	-	-
1	OXMC DOX- vs OXMC DOX +	1	0.44351	1	0.09211	-									1	OXMC DOX- vs OXMC DOX +	1	0.03751	0.64183	0.31175	-
	OXMC DOX- vs OX DOX -	1	0.10176	1	0.18007	-										OXMC DOX- vs OX DOX -	0.32467	1	0.2773	0.48155	-
	OXMC DOX+ vs OX DOX -	1	0.9544	1	1	-										OXMC DOX+ vs OX DOX -	0.57852	0.07635	1	1	-
2	OXMC DOX- vs OXMC DOX +	1	1	0.82208	0.02718	0.01031									2	OXMC DOX- vs OXMC DOX +	0.13687	0.52864	0.05639	0.08762	0.02033
	OXMC DOX- vs OX DOX -	1	1	1	0.03886	0.07897										OXMC DOX- vs OX DOX -	0.1848	0.30107	0.13838	0.11587	0.15144
	OXMC DOX+ vs OX DOX -	1	1	1	1	1										OXMC DOX+ vs OX DOX -	1	1	1	1	1
3	OXMC DOX- vs OXMC DOX +	0.11042	0.08119	0.00698	2.41395e-05	2.74376e-06									3	OXMC DOX- vs OXMC DOX +	0.06213	0.00641	0.02448	0.000632427	1.11956e-05
	OXMC DOX- vs OX DOX -	0.75609	0.15639	0.1624	0.000137989	0.02034										OXMC DOX- vs OX DOX -	0.32117	0.01235	0.32586	0.00262	0.00185
	OXMC DOX+ vs OX DOX -	1	1	0.95638	1	0.00708										OXMC DOX+ vs OX DOX -	1	1	1	1	0.31355
4	OXMC DOX- vs OXMC DOX +	0.03848	7.64773e-06	0.00183	2.55663e-08	2.41726e-07									4	OXMC DOX- vs OXMC DOX +	0.01071	4.99457e-05	0.00563	7.52286e-05	8.24314e-05
	OXMC DOX- vs OX DOX -	0.00416	1.77623e-07	0.0011	2.13021e-07	0.000257598										OXMC DOX- vs OX DOX -	0.09444	0.00149	0.05925	0.000389777	0.00408
	OXMC DOX+ vs OX DOX -	0.46038	0.00735	1	1	0.03276										OXMC DOX+ vs OX DOX -	1	1	1	1	0.81873
[truncated: 11 more columns]

## Sheet: Bouts
	OXMC DOX -												OXMC DOX +												OX DOX -
	Dark					Light							Dark					Light							Dark					Light
DOU ab 0W	W	R	S	U	C	W	R	S	U	C		control 0w	W	R	S	U	C	W	R	S	U	C		OX ab 0W	W	R	S	U	C	W	R	S	U	C
N1	77	20	77	0	0	213	58	214	0	0		N1	102	22	101	0	0	198	66	198	0	0		N1	78	8	78	0	0	105	39	107	0	0
N2	56	18	54	0	0	135	41	136	0	0		N2	100	22	99	0	0	203	38	202	0	0		N2	33	13	33	0	0	127	46	135	0	0
N3	86	21	85	0	0	215	50	215	0	0		N3	106	26	106	0	0	251	68	251	0	0		N3	113	19	112	0	0	161	71	162	0	0
N4	135	24	135	0	0	196	42	196	0	0		N4	53	12	53	0	0	199	56	195	0	0		N4	78	22	79	0	0	201	65	204	0	0
N5	41	8	40	0	0	121	33	120	0	0		N5	71	15	69	0	1	181	51	182	0	0		N5	60	22	59	0	0	172	36	171	0	0
N6	127	23	126	0	0	218	45	216	0	0		N6	72	21	71	0	0	180	66	181	0	0		N6	114	23	113	0	0	199	36	196	0	0
N7	45	10	44	0	0	131	47	129	0	0		N7	101	14	100	0	0	164	45	165	0	0		N7	124	28	124	0	0	182	57	182	0	0
N8	313	32	312	0	0	353	50	353	0	0
	Dark					Light							Dark					Light							Dark					Light
DOU ab 1W	W	R	S	U	C	W	R	S	U	C		control 1w	W	R	S	U	C	W	R	S	U	C		OX ab 1W	W	R	S	U	C	W	R	S	U	C
N1	114	25	109	4	0	217	50	215	0	0		N1	108	14	109	0	0	263	53	265	0	0		N1	127	24	126	0	0	184	62	185	0	0
N2	104	28	80	24	0	169	60	170	1	0		N2	136	18	136	0	0	159	43	160	0	0		N2	65	14	64	0	0	170	56	170	0	0
N3	98	17	83	15	0	176	52	171	4	0		N3	91	22	90	0	0	143	46	143	0	0		N3	95	19	94	0	0	169	67	169	0	0
N4	135	29	131	3	0	175	53	174	0	0		N4	117	25	116	0	0	204	46	206	0	1		N4	122	22	123	0	0	185	43	185	0	0
												N5	66	20	65	0	0	170	36	171	0	0
N6	138	24	137	0	0	198	48	199	0	0		N6	96	20	96	0	0	185	52	186	0	0
N7	89	25	90	2	0	171	53	172	0	0		N7	78	12	77	0	0	201	44	202	0	0
N8	140	30	142	0	0	281	57	284	0	0
	Dark					Light							Dark					Light							Dark					Light
DOU ab 2W	W	R	S	U	C	W	R	S	U	C		control 2w	W	R	S	U	C	W	R	S	U	C		OX ab 2W	W	R	S	U	C	W	R	S	U	C
N1	176	9	68	92	18	179	30	139	20	20		N1	111	17	111	0	0	202	45	204	0	0		N1	142	18	142	0	4	184	48	184	0	3
N2	202	0	10	178	16	206	9	128	63	17		N2	106	14	106	0	0	176	37	176	0	0		N2	88	16	87	0	3	152	40	151	0	6
N3	152	16	101	43	8	198	31	191	2	10		N3	131	20	130	0	0	155	42	155	0	0		N3	107	29	107	0	11	160	42	159	0	4
N4	167	40	161	4	3	155	44	148	3	6														N4	121	25	118	0	3	187	31	183	0	4
												N6	83	21	82	0	0	205	60	207	0	0
N7	265	11	93	166	7	212	39	179	28	3		N7	70	15	69	0	0	202	51	203	0	0
N8	203	24	169	28	5	204	46	198	9	5
	Dark					Light							Dark					Light							Dark					Light
DOU ab 3W	W	R	S	U	C	W	R	S	U	C		control 3w	W	R	S	U	C	W	R	S	U	C		OX ab 3W	W	R	S	U	C	W	R	S	U	C
N1	186	0	53	117	17	243	18	180	53	10		N1	140	11	141	0	0	236	51	237	0	0		N1	119	24	118	0	14	211	54	210	0	4
N2	135	0	1	121	13	164	2	104	44	17		N2	182	18	182	0	0	242	43	242	0	0		N2	67	19	67	0	11	184	40	185	0	13
N3	206	6	84	108	15	178	30	156	13	10		N3	200	27	200	0	0	221	51	222	0	0		N3	88	22	85	0	23	183	45	188	0	7
N4	233	17	120	108	10	181	25	146	26	11		N4	125	23	124	0	0	225	56	236	0	0		N4	98	8	98	0	16	197	26	196	0	6
												N5	60	15	60	0	0	196	45	196	0	0
N6	110	4	44	49	15	152	24	132	7	13		N6	121	26	120	0	0	194	56	194	0	0
N7	216	0	7	203	7	220	16	175	45	3		N7	95	17	96	0	0	205	45	206	0	0
N8	242	25	140	94	7	277	40	243	29	7
	Dark					Light							Dark					Light							Dark					Light
DOU ab 4W	W	R	S	U	C	W	R	S	U	C		control 4w	W	R	S	U	C	W	R	S	U	C		OX ab 4W	W	R	S	U	C	W	R	S	U	C
N1	170	1	50	104	15	302	11	213	77	11		N1	108	19	110	0	0	217	48	218	0	0		N1	141	26	140	0	17	177	37	174	0	8
N2	115	0	10	84	20	184	2	134	33	16		N2	103	13	102	0	0	234	53	233	0	0		N2	120	23	114	0	9	150	40	151	0	8
N3	192	1	58	114	19	216	21	151	40	25		N3	128	27	130	0	0	201	41	203	0	0		N3	142	24	130	0	18	165	45	167	0	5
N4	174	2	41	122	14	223	24	174	28	27		N4	100	16	100	0	0	227	48	228	0	0		N4	221	24	214	0	15	246	44	240	0	12
												N5	95	20	94	0	0	182	44	182	0	0
N6	158	0	40	92	27	181	25	146	31	5		N6	82	12	81	0	0	186	56	183	0	0
N7	126	3	39	75	12	184	27	150	25	9		N7	215	19	214	0	0	277	45	276	0	0
N8	231	14	126	97	11	247	40	196	44	15
	W						R						S						U						C						W						R						S						U
	double ab		control		oxab		double ab		control		oxab		double ab		control		oxab		double ab		control		oxab		double ab		control		oxab		double ab		control		oxab		double ab		control		oxab		double ab		control		oxab		double ab
	AVE	SEM	AVE	SEM	AVE	SEM	AVE	SEM	AVE	SEM	AVE	SEM	AVE	SEM	AVE	SEM	AVE	SEM	AVE	SEM	AVE	SEM	AVE	SEM	AVE	SEM	AVE	SEM	AVE	SEM	AVE	SEM	AVE	SEM	AVE	SEM	AVE	SEM	AVE	SEM	AVE	SEM	AVE	SEM	AVE	SEM	AVE	SEM	AVE
0W	110	31.5351	86.4286	7.84631	85.7143	12.5066	19.5	2.72554	18.8571	1.95702	19.2857	2.54216	109.125	31.562	85.5714	7.85541	85.4286	12.4381	0	0	0	0	0	0	0	0	0.142857	0.142857	0	0	197.75	26.5012	196.571	10.4537	163.857	13.6633	45.75	2.63052	55.7143	4.40083	50	5.44234	197.375	26.5867	196.286	10.2903	165.286	12.983	0
1W	116.857	7.89342	98.8571	8.96668	102.25	14.2675	25.4286	1.64544	18.7143	1.70034	19.75	2.17466	110.286	10.0279	98.4286	9.11006	101.75	14.505	6.85714	3.45328	0	0	0	0	0	0	0	0	0	0	198.143	15.3008	189.286	14.8303	177	4.33974	53.2857	1.53862	45.7143	2.16811	57	5.18009	197.857	15.7743	190.429	15.0473	177.25	4.47912	0.714286
2W	194.167	16.3328	100.2	10.7396	114.5	11.3908	16.6667	5.67842	17.4	1.36382	22	3.02765	100.333	24.2592	99.6	10.8194	113.5	11.4637	85.1667	29.907	0	0	0	0	9.5	2.48663	0	0	5.25	1.93111	192.333	8.78129	188	9.78264	170.75	8.69267	33.1667	5.52218	47	3.96232	40.25	3.52077	163.833	11.9538	189	10.1735	169.25	8.39022	20.8333
3W	189.714	18.8512	131.857	18.1992	93	10.8089	7.42857	3.7152	19.5714	2.24518	18.25	3.5678	64.1429	20.1488	131.857	18.1874	92	10.7471	114.286	17.3723	0	0	0	0	12	1.52753	0	0	16	2.54951	202.143	17.3142	217	7.2045	193.75	6.57489	22.1429	4.50623	49.5714	2.02199	41.25	5.85057	162.286	16.6257	219	7.67494	194.75	5.58831	31
4W	166.571	14.8354	118.714	16.8886	156	22.2523	3	1.87718	18	1.90238	24.25	0.629153	52	13.5524	118.714	16.8646	149.5	22.1566	98.2857	6.22864	0	0	0	0	16.8571	2.10926	0	0	14.75	2.01556	219.571	16.6116	217.714	12.3707	184.5	21.2309	21.4286	4.58183	47.8571	1.96915	41.5	1.84842	166.286	10.9951	217.571	12.3767	183	19.6002	39.7143
		Dark															Light
		W	R	S	DT	C											W	R	S	DT	C
0	OXMC DOX- vs OXMC DOX +	1	1	1	-	-									0	OXMC DOX- vs OXMC DOX +	1	0.31793	1	-	-
	OXMC DOX- vs OX DOX -	1	1	1	-	-										OXMC DOX- vs OX DOX -	0.67442	1	0.73986	-	-
	OXMC DOX+ vs OX DOX -	1	1	1	-	-										OXMC DOX+ vs OX DOX -	0.76634	1	0.83227	-	-
1	OXMC DOX- vs OXMC DOX +	0.52822	0.03668	1	0.12673	-									1	OXMC DOX- vs OXMC DOX +	1	0.13037	1	0.53479	0.84342
	OXMC DOX- vs OX DOX -	1	0.17357	1	0.23333	-										OXMC DOX- vs OX DOX -	1	1	1	0.74124	1
	OXMC DOX+ vs OX DOX -	1	1	1	1	-										OXMC DOX+ vs OX DOX -	1	0.04012	1	1	1
2	OXMC DOX- vs OXMC DOX +	0.00104	1	1	0.03482	0.01131									2	OXMC DOX- vs OXMC DOX +	1	0.16303	0.34663	0.11665	0.00868
	OXMC DOX- vs OX DOX -	0.00605	1	1	0.04902	0.47601										OXMC DOX- vs OX DOX -	0.39585	0.97787	1	0.15108	0.19386
	OXMC DOX+ vs OX DOX -	1	1	1	1	0.29778										OXMC DOX+ vs OX DOX -	0.7126	1	0.75785	1	0.55508
3	OXMC DOX- vs OXMC DOX +	0.08761	0.03553	0.04661	7.15775e-06	2.74031e-05									3	OXMC DOX- vs OXMC DOX +	1	0.000296207	0.01145	0.000253842	0.000109627
	OXMC DOX- vs OX DOX -	0.01101	0.13781	1	4.48405e-05	0.24645										OXMC DOX- vs OX DOX -	1	0.02123	0.34796	0.00117	0.65625
	OXMC DOX+ vs OX DOX -	0.56274	1	0.57279	1	6.1175e-06										OXMC DOX+ vs OX DOX -	0.79034	0.58435	0.69542	1	0.00722
4	OXMC DOX- vs OXMC DOX +	0.15801	4.87021e-05	0.02563	5.77921e-11	2.75882e-06									4	OXMC DOX- vs OXMC DOX +	1	0.000102743	0.03124	2.40111e-05	0.000200503
	OXMC DOX- vs OX DOX -	1	5.47309e-06	0.00557	5.58103e-10	1										OXMC DOX- vs OX DOX -	0.5317	0.00563	1	0.000137314	0.14124
	OXMC DOX+ vs OX DOX -	0.54745	0.12864	0.75752	1	8.16781e-05										OXMC DOX+ vs OX DOX -	0.5997	0.75507	0.33951	1	0.07556
[truncated: 11 more columns]

## Sheet: duration
	OXMC DOX -												OXMC DOX +												OX DOX -
	Dark					Light							Dark					Light							Dark					Light
DOU ab 0W	W	R	S	U	C	W	R	S	U	C		control 0w	W	R	S	U	C	W	R	S	U	C		OX ab 0W	W	R	S	U	C	W	R	S	U	C
N1	395	65	148	0	0	86	59	99	0	0		N1	310	72	98	0	0	86	56	112	0	0		N1	410	43	138	0	0	132	86	241	0	0
N2	564	72	190	0	0	130	73	165	0	0		N2	256	77	159	0	0	73	73	126	0	0		N2	1001	59	284	0	0	98	74	201	0	0
N3	369	61	119	0	0	78	77	104	0	0		N3	324	48	70	0	0	71	57	84	0	0		N3	268	50	106	0	0	86	65	151	0	0
N4	201	67	106	0	0	83	69	122	0	0		N4	702	81	94	0	0	85	63	115	0	0		N4	406	65	108	0	0	82	52	104	0	0
N5	879	110	157	0	0	146	95	185	0	0		N5	513	57	84	0	0	94	67	123	0	0		N5	464	75	231	0	0	93	66	144	0	0
N6	242	70	85	0	0	80	73	103	0	0		N6	463	57	121	0	0	92	60	124	0	0		N6	236	67	130	0	0	88	78	116	0	0
N7	816	57	133	0	0	131	78	172	0	0		N7	318	66	101	0	0	77	73	164	0	0		N7	202	54	133	0	0	83	50	138	0	0
N8	74	84	55	0	0	54	74	57	0	0
	Dark					Light							Dark					Light							Dark					Light
DOU ab 1W	W	R	S	U	C	W	R	S	U	C		control 1w	W	R	S	U	C	W	R	S	U	C		OX ab 1W	W	R	S	U	C	W	R	S	U	C
N1	257	65	111	25	0	86	81	94	0	0		N1	224	80	90	0	0	52	67	89	0	0		N1	237	56	92	0	0	82	70	128	0	0
N2	321	46	101	14	0	102	62	129	76	0		N2	201	74	93	0	0	86	72	158	0	0		N2	550	50	104	0	0	84	80	143	0	0
N3	303	83	123	16	0	89	69	137	20	0		N3	295	74	163	0	0	102	80	173	0	0		N3	323	53	121	0	0	86	54	147	0	0
N4	216	61	92	12	0	90	73	135	0	0		N4	234	78	119	0	0	92	65	103	0	0		N4	240	57	102	0	0	93	70	123	0	0
												N5	444	70	192	0	0	101	65	138	0	0
N6	219	79	80	0	0	86	81	111	0	0		N6	339	42	101	0	0	101	65	113	0	0
N7	353	46	117	18	0	90	71	139	0	0		N7	437	70	106	0	0	83	77	113	0	0
N8	215	62	78	0	0	65	73	72	0	0
	Dark					Light							Dark					Light							Dark					Light
DOU ab 2W	W	R	S	U	C	W	R	S	U	C		control 2w	W	R	S	U	C	W	R	S	U	C		OX ab 2W	W	R	S	U	C	W	R	S	U	C
N1	156	77	165	18	94	102	96	139	22	74		N1	232	67	107	0	0	73	76	118	0	0		N1	201	55	93	0	35	85	62	130	0	21
N2	190	0	57	14	42	116	82	123	16	81		N2	269	80	127	0	0	81	86	145	0	0		N2	352	51	127	0	45	88	60	172	0	50
N3	182	60	108	21	95	87	95	112	14	70		N3	184	77	134	0	0	93	70	165	0	0		N3	279	42	109	0	42	89	68	156	0	36
N4	169	53	76	10	109	114	77	146	12	68														N4	250	58	94	0	77	100	87	115	0	169
												N6	391	57	116	0	0	82	57	110	0	0
N7	116	74	84	18	82	75	85	129	16	50		N7	492	61	113	0	0	80	66	115	0	0
N8	132	82	80	16	62	81	60	116	22	88
	Dark					Light							Dark					Light							Dark					Light
DOU ab 3W	W	R	S	U	C	W	R	S	U	C		control 3w	W	R	S	U	C	W	R	S	U	C		OX ab 3W	W	R	S	U	C	W	R	S	U	C
N1	174	0	126	15	88	79	82	109	17	154		N1	179	84	82	0	0	60	62	104	0	0		N1	252	50	94	0	70	80	50	105	0	30
N2	290	0	48	14	56	132	54	174	14	92		N2	148	67	80	0	0	68	72	97	0	0		N2	463	76	153	0	34	87	56	123	0	70
N3	141	54	123	18	68	91	99	145	22	78		N3	131	64	75	0	0	72	72	106	0	0		N3	360	40	118	0	35	78	60	130	0	42
N4	119	82	93	16	101	113	64	132	15	109		N4	211	69	122	0	0	75	48	100	0	0		N4	313	81	112	0	46	99	69	108	0	32
												N5	540	61	163	0	0	72	61	134	0	0
N6	324	44	118	13	94	130	56	156	14	98		N6	248	65	95	0	0	104	61	100	0	0
N7	179	0	30	16	113	79	96	130	22	125		N7	330	48	114	0	0	78	64	117	0	0
N8	120	75	72	15	68	65	67	86	18	113
	Dark					Light							Dark					Light							Dark					Light
DOU ab 4W	W	R	S	U	C	W	R	S	U	C		control 4w	W	R	S	U	C	W	R	S	U	C		OX ab 4W	W	R	S	U	C	W	R	S	U	C
N1	210	104	70	15	143	59	76	101	19	114		N1	262	52	125	0	0	70	65	113	0	0		N1	192	46	99	0	76	104	52	124	0	32
N2	338	0	155	12	84	114	56	146	23	95		N2	300	52	113	0	0	62	71	106	0	0		N2	194	76	152	0	45	87	86	173	0	46
N3	156	16	149	18	127	87	65	129	18	101		N3	162	72	157	0	0	86	67	113	0	0		N3	189	73	105	0	45	96	72	142	0	39
N4	208	46	87	14	113	85	44	116	17	83		N4	288	78	131	0	0	68	66	107	0	0		N4	106	48	80	0	47	72	54	91	0	83
												N5	306	62	136	0	0	83	66	137	0	0
N6	222	0	103	14	98	101	65	151	17	104		N6	418	71	99	0	0	102	60	112	0	0
N7	276	57	157	14	84	105	53	139	16	100		N7	135	63	60	0	0	66	63	78	0	0
N8	125	52	82	14	142	83	56	94	16	77
	W						R						S						U						C						W						R						S						U
	double ab		control		oxab		double ab		control		oxab		double ab		control		oxab		double ab		control		oxab		double ab		control		oxab		double ab		control		oxab		double ab		control		oxab		double ab		control		oxab		double ab
	AVE	SEM	AVE	SEM	AVE	SEM	AVE	SEM	AVE	SEM	AVE	SEM	AVE	SEM	AVE	SEM	AVE	SEM	AVE	SEM	AVE	SEM	AVE	SEM	AVE	SEM	AVE	SEM	AVE	SEM	AVE	SEM	AVE	SEM	AVE	SEM	AVE	SEM	AVE	SEM	AVE	SEM	AVE	SEM	AVE	SEM	AVE	SEM	AVE
0W	442.5	102.362	412.286	59.4061	426.714	102.813	73.25	5.9754	65.4286	4.54007	59	4.13464	124.125	15.0789	103.857	10.9271	161.429	25.8824	0	0	0	0	0	0	0	0	0	0	0	0	98.5	11.5295	82.5714	3.42857	94.5714	6.58952	74.75	3.56946	64.1429	2.67643	67.2857	4.99864	125.875	15.605	121.143	8.96137	156.429	18.2872	0
1W	269.143	21.4281	310.571	37.8599	337.5	73.5827	63.1429	5.43984	69.7143	4.82905	54	1.58114	100.286	6.70364	123.429	14.7501	104.75	6.01907	12.1429	3.49441	0	0	0	0	0	0	0	0	0	0	86.8571	4.1772	88.1429	6.68128	86.25	2.39357	72.8571	2.53009	70.1429	2.37475	68.5	5.37742	116.714	9.68729	126.714	11.5567	135.25	5.77891	13.7143
2W	157.5	11.7806	313.6	56.2411	270.5	31.5766	57.6667	12.363	68.4	4.44522	51.5	3.47611	95	15.5134	119.4	4.88467	105.75	7.97261	16.1667	1.55813	0	0	0	0	80.6667	10.0521	0	0	49.75	9.32179	95.8333	7.08716	81.8	3.21559	90.5	3.27872	82.5	5.42064	71	4.85798	69.25	6.15596	127.5	5.38362	130.6	10.529	143.25	12.7892	17
3W	192.429	31.1042	255.286	53.771	347	44.5402	36.4286	13.7249	65.4286	4.04061	61.75	9.93626	87.1429	14.4822	104.429	11.8379	119.25	12.3516	15.2857	0.606092	0	0	0	0	84	7.7797	0	0	46.25	8.37033	98.4286	10.0756	75.5714	5.20923	86	4.74342	74	6.97956	62.8571	3.07392	58.75	3.98696	133.143	11.0721	108.286	4.94115	116.5	5.97913	17.4286
4W	219.286	26.915	267.286	35.9647	170.25	21.4413	39.2857	14.0894	64.2857	3.78414	60.75	7.97261	114.714	14.2774	117.286	11.7609	109	15.2916	14.4286	0.685119	0	0	0	0	113	9.56681	0	0	53.25	7.59797	90.5714	6.83777	76.7143	5.3839	89.75	6.86021	59.2857	3.90186	65.4286	1.28836	66	8.04156	125.143	8.37635	109.429	6.54238	132.5	17.1391	18
		Dark															Light
		W	R	S	DT	C											W	R	S	DT	C
0	OXMC DOX- vs OXMC DOX +	1	0.85464	1	-	-									0	OXMC DOX- vs OXMC DOX +	0.57128	0.19207	1	-	-
	OXMC DOX- vs OX DOX -	1	0.17828	0.47643	-	-										OXMC DOX- vs OX DOX -	1	0.54736	0.4817	-	-
	OXMC DOX+ vs OX DOX -	1	1	0.12318	-	-										OXMC DOX+ vs OX DOX -	1	1	0.3569	-	-
1	OXMC DOX- vs OXMC DOX +	1	0.99489	0.4143	0.0044	-									1	OXMC DOX- vs OXMC DOX +	1	1	1	0.52349	-
	OXMC DOX- vs OX DOX -	0.85178	0.75715	1	0.01419	-										OXMC DOX- vs OX DOX -	1	1	0.80669	0.72871	-
	OXMC DOX+ vs OX DOX -	1	0.1761	0.89399	1	-										OXMC DOX+ vs OX DOX -	1	1	1	1	-
2	OXMC DOX- vs OXMC DOX +	0.02424	1	0.46502	4.47805e-07	3.12884e-05									2	OXMC DOX- vs OXMC DOX +	0.2581	0.44337	1	6.41166e-07	0.01578
	OXMC DOX- vs OX DOX -	0.1573	1	1	8.99016e-07	0.06975										OXMC DOX- vs OX DOX -	1	0.36102	0.77177	1.28173e-06	1
	OXMC DOX+ vs OX DOX -	1	0.7388	1	1	0.00505										OXMC DOX+ vs OX DOX -	0.94771	1	1	1	0.0365
3	OXMC DOX- vs OXMC DOX +	0.92253	0.15198	1	6.22484e-14	8.22072e-08									3	OXMC DOX- vs OXMC DOX +	0.132	0.40953	0.12762	6.32751e-10	1.97986e-08
	OXMC DOX- vs OX DOX -	0.12788	0.40353	0.43076	6.45925e-13	0.0034										OXMC DOX- vs OX DOX -	0.97226	0.25868	0.67495	5.84345e-09	7.39774e-05
	OXMC DOX+ vs OX DOX -	0.62529	1	1	1	0.000561881										OXMC DOX+ vs OX DOX -	1	1	1	1	0.00402
4	OXMC DOX- vs OXMC DOX +	0.7954	0.25735	1	8.78885e-13	1.08692e-08									4	OXMC DOX- vs OXMC DOX +	0.3651	0.79853	0.68914	2.82251e-12	1.65288e-09
	OXMC DOX- vs OX DOX -	0.98762	0.59436	1	8.9343e-12	0.000189652										OXMC DOX- vs OX DOX -	1	0.89604	1	2.83615e-11	0.000124081
	OXMC DOX+ vs OX DOX -	0.19337	1	1	1	0.000594029										OXMC DOX+ vs OX DOX -	0.62371	1	0.41341	1	5.40282e-05
[truncated: 11 more columns]
