# Supplementary material for: Dual orexin and MCH neuron-ablated mice display severe sleep attacks and cataplexy
Source: eLife. 2020 Apr 21;9:e54275. doi: 10.7554/eLife.54275 (PMC7173968; doi:10.7554/eLife.54275)
Supplement: Figure 6—source data 1. [file elife-54275-fig6-data1.xlsx]

## Sheet: tactile stimulation
			N1			N2			N3			N4			N5			N6
																					W%	SEM	C%				Wake after stimulation	C	DT	NR
Cataplexy			0.833333	0.166667		0.75	0.25		0.5	0.5		1	0		0.5	0.5		1	0		0.763889	0.0923376	0.236111	0.0923376			N1	1	0	0
			0.833333	0.166667		0.75	0.25		0.5	0.5		1	0		0.5	0.5		1	0		0.763889	0.0923376	0.236111	0.0923376			N2	0.625	0	0
			0.666667	0.333333		0.75	0.25		0.5	0.5		1	0		0.5	0.5		1	0		0.736111	0.0923376	0.263889	0.0923376			N3	0.5	0	0
			0.5	0.5		0.75	0.25		0.333333	0.666667		1	0		0.5	0.5		1	0		0.680556	0.114699	0.319444	0.114699			N4	0.333333	0	0
			0.5	0.5		0.625	0.375		0.333333	0.666667		1	0		0.5	0.5		1	0		0.659722	0.114067	0.340278	0.114067			N5	1	0	0
			0.5	0.5		0.625	0.375		0.333333	0.666667		1	0		0.5	0.5		1	0		0.659722	0.114067	0.340278	0.114067			N6	0.5	0	0
			0.5	0.5		0.375	0.625		0.333333	0.666667		1	0		0.5	0.5		0.5	0.5		0.534722	0.0976676	0.465278	0.0976676			Wake after stimulation
			0.333333	0.666667		0.375	0.625		0.333333	0.666667		0.666667	0.333333		0.5	0.5		0.5	0.5		0.451389	0.0531602	0.548611	0.0531602				W%	SEM
			0.333333	0.666667		0.375	0.625		0.166667	0.833333		0.666667	0.333333		0	1		0.5	0.5		0.340278	0.0964753	0.659722	0.0964753			C	0.340278	0.114067
			0.333333	0.666667		0.375	0.625		0.166667	0.833333		0	1		0	1		0	1		0.145833	0.0711594	0.854167	0.0711594			DT	1	0
			0	1		0.25	0.75		0.166667	0.833333		0	1		0	1		0	1		0.0694444	0.0452189	0.930556	0.0452189			S	1	0
			0	1		0	1		0	1		0	1		0	1		0	1		0	0	1	0
			0	1		0	1		0	1		0	1		0	1		0	1		0	0	1	0
			0	1		0	1		0	1		0	1		0	1		0	1		0	0	1	0				one wa ANOVA BONFE	one way ANOVA Reap Bonfe
			0	1		0	1		0	1		0	1		0	1		0	1		0	0	1	0			DT vs c	0.00010083
			#DIV/0!	#DIV/0!		#DIV/0!	#DIV/0!		#DIV/0!	#DIV/0!		#DIV/0!	#DIV/0!		#DIV/0!	#DIV/0!		#DIV/0!	#DIV/0!		0	0	1	0			S vs c	0.00010083
			0	1		0.375	0.625		0.5	0.5		0.666667	0.333333		0	1		0.5	0.5		0.340278	0.114067	0.659722	0.114067			S vs DT	1
			0	1		0.375	0.625		0.5	0.5		0.666667	0.333333		0	1		0.5	0.5		0.340278	0.114067	0.659722	0.114067
			0	1		0.375	0.625		0.5	0.5		0.666667	0.333333		0	1		0.5	0.5		0.340278	0.114067	0.659722	0.114067
			0	1		0.5	0.5		0.5	0.5		0.666667	0.333333		0	1		0.5	0.5		0.361111	0.117195	0.638889	0.117195
			0.333333	0.666667		0.5	0.5		0.5	0.5		0.666667	0.333333		0	1		0.5	0.5		0.416667	0.0937886	0.583333	0.0937886
			0.333333	0.666667		0.625	0.375		0.5	0.5		0.666667	0.333333		0	1		0.5	0.5		0.4375	0.0996231	0.5625	0.0996231
			0.333333	0.666667		0.75	0.25		0.5	0.5		0.666667	0.333333		0	1		0.5	0.5		0.458333	0.109185	0.541667	0.109185
			0.333333	0.666667		0.75	0.25		0.5	0.5		0.666667	0.333333		0	1		0.5	0.5		0.458333	0.109185	0.541667	0.109185
			0.5	0.5		0.75	0.25		0.5	0.5		1	0		0	1		0.5	0.5		0.541667	0.135657	0.458333	0.135657
			0.666667	0.333333		0.625	0.375		0.5	0.5		1	0		0	1		0.5	0.5		0.548611	0.132819	0.451389	0.132819
			0.666667	0.333333		0.625	0.375		0.5	0.5		1	0		0	1		0.5	0.5		0.548611	0.132819	0.451389	0.132819
			0.666667	0.333333		0.625	0.375		0.666667	0.333333		1	0		0	1		0.5	0.5		0.576389	0.133687	0.423611	0.133687
			0.666667	0.333333		0.625	0.375		0.833333	0.166667		1	0		0	1		0.5	0.5		0.604167	0.140168	0.395833	0.140168
			0.666667	0.333333		0.625	0.375		0.833333	0.166667		1	0		0.5	0.5		0.5	0.5		0.6875	0.0803277	0.3125	0.0803277
			0.666667	0.333333		0.625	0.375		0.833333	0.166667		1	0		0.5	0.5		0.5	0.5		0.6875	0.0803277	0.3125	0.0803277
			W%	C%		W%	C%		W%	C%		W%	C%		W%	C%		W%	C%		W%		C%
																					W%	SEM	DT%
DT sleep			1	0		1	0		1	0		1	0		1	0		1	0		1	0	0	0
			1	0		1	0		1	0		1	0		1	0		1	0		1	0	0	0
			1	0		1	0		1	0		1	0		1	0		1	0		1	0	0	0
			1	0		0.857143	0.142857		1	0		1	0		1	0		1	0		0.97619	0.0238095	0.0238095	0.0238095
			1	0		0.857143	0.142857		1	0		1	0		1	0		1	0		0.97619	0.0238095	0.0238095	0.0238095
			1	0		0.857143	0.142857		1	0		1	0		1	0		1	0		0.97619	0.0238095	0.0238095	0.0238095
			1	0		0.857143	0.142857		1	0		1	0		1	0		1	0		0.97619	0.0238095	0.0238095	0.0238095
			1	0		0.857143	0.142857		1	0		1	0		1	0		1	0		0.97619	0.0238095	0.0238095	0.0238095
			1	0		0.857143	0.142857		0.666667	0.333333		1	0		1	0		1	0		0.920635	0.0558947	0.0793651	0.0558947
			1	0		0.714286	0.285714		0.5	0.5		1	0		1	0		1	0		0.869048	0.0873196	0.130952	0.0873196
			1	0		0.714286	0.285714		0.5	0.5		0.666667	0.333333		1	0		1	0		0.813492	0.0883237	0.186508	0.0883237
			0.8	0.2		0.571429	0.428571		0.333333	0.666667		0.666667	0.333333		0.4	0.6		0.5	0.5		0.545238	0.0703275	0.454762	0.0703275
			0	1		0	1		0	1		0	1		0	1		0	1		0	0	1	0
			0	1		0	1		0	1		0	1		0	1		0	1		0	0	1	0
			0	1		0	1		0	1		0	1		0	1		0	1		0	0	1	0
			#DIV/0!	#DIV/0!		#DIV/0!	#DIV/0!		#DIV/0!	#DIV/0!		#DIV/0!	#DIV/0!		#DIV/0!	#DIV/0!		#DIV/0!	#DIV/0!		0	0	1	0
			1	0		1	0		1	0		1	0		1	0		1	0		1	0	0	0
			1	0		1	0		1	0		1	0		1	0		1	0		1	0	0	0
			1	0		1	0		1	0		1	0		1	0		1	0		1	0	0	0
			1	0		1	0		1	0		1	0		1	0		1	0		1	0	0	0
			1	0		1	0		1	0		1	0		1	0		1	0		1	0	0	0
			1	0		1	0		1	0		1	0		1	0		1	0		1	0	0	0
			1	0		1	0		1	0		1	0		1	0		1	0		1	0	0	0
			1	0		1	0		1	0		1	0		1	0		1	0		1	0	0	0
			1	0		0.857143	0.142857		1	0		1	0		1	0		1	0		0.97619	0.0238095	0.0238095	0.0238095
			1	0		0.857143	0.142857		1	0		1	0		1	0		1	0		0.97619	0.0238095	0.0238095	0.0238095
			1	0		0.857143	0.142857		1	0		1	0		1	0		1	0		0.97619	0.0238095	0.0238095	0.0238095
			1	0		1	0		1	0		1	0		1	0		1	0		1	0	0	0
			1	0		1	0		1	0		1	0		1	0		1	0		1	0	0	0
			1	0		1	0		1	0		1	0		1	0		1	0		1	0	0	0
			1	0		1	0		1	0		1	0		1	0		1	0		1	0	0	0
			W%	DT%		W%	DT%		W%	DT%		W%	DT%		W%	DT%		W%	DT%		W%		DT%
																					W%	SEM	S%
NREM			0.714286	0.285714		0.4	0.6		0.285714	0.714286		0	1		0.166667	0.833333		0.833333	0.166667		0.4	0.130902	0.6	0.130902
			0.571429	0.428571		0.4	0.6		0.166667	0.833333		0	1		0.166667	0.833333		0.833333	0.166667		0.356349	0.125781	0.643651	0.125781
			0.571429	0.428571		0.4	0.6		0.142857	0.857143		0	1		0.333333	0.666667		0.666667	0.333333		0.352381	0.102869	0.647619	0.102869
			0.571429	0.428571		0.2	0.8		0.142857	0.857143		0	1		0.333333	0.666667		0.833333	0.166667		0.346825	0.125269	0.653175	0.125269
			0.285714	0.714286		0	1		0.142857	0.857143		0	1		0.333333	0.666667		0.833333	0.166667		0.265873	0.126947	0.734127	0.126947
			0.285714	0.714286		0	1		0.142857	0.857143		0	1		0.333333	0.666667		0.666667	0.333333		0.238095	0.102869	0.761905	0.102869
			0	1		0	1		0.142857	0.857143		0	1		0.333333	0.666667		0.5	0.5		0.162698	0.0861577	0.837302	0.0861577
			0	1		0	1		0.142857	0.857143		0	1		0.333333	0.666667		0.333333	0.666667		0.134921	0.0666856	0.865079	0.0666856
			0	1		0	1		0	1		0	1		0.166667	0.833333		0.166667	0.833333		0.0555556	0.0351364	0.944444	0.0351364
			0	1		0	1		0	1		0	1		0.166667	0.833333		0	1		0.0277778	0.0277778	0.972222	0.0277778
			0	1		0	1		0	1		0	1		0.166667	0.833333		0	1		0.0277778	0.0277778	0.972222	0.0277778
			0	1		0	1		0	1		0	1		0.166667	0.833333		0	1		0.0277778	0.0277778	0.972222	0.0277778
			0	1		0	1		0	1		0	1		0	1		0	1		0	0	1	0
			0	1		0	1		0	1		0	1		0	1		0	1		0	0	1	0
			0	1		0	1		0	1		0	1		0	1		0	1		0	0	1	0
			#DIV/0!	#DIV/0!		#DIV/0!	#DIV/0!		#DIV/0!	#DIV/0!		#DIV/0!	#DIV/0!		#DIV/0!	#DIV/0!		#DIV/0!	#DIV/0!		0	0	1	0
			1	0		1	0		1	0		1	0		1	0		1	0		1	0	0	0
			1	0		1	0		1	0		1	0		1	0		1	0		1	0	0	0
			1	0		1	0		1	0		1	0		1	0		1	0		1	0	0	0
			1	0		0.8	0.2		1	0		0.857143	0.142857		0.666667	0.333333		1	0		0.887302	0.056366	0.112698	0.056366
			0.857143	0.142857		0.8	0.2		1	0		0.857143	0.142857		0.666667	0.333333		1	0		0.863492	0.0516788	0.136508	0.0516788
			0.857143	0.142857		0.8	0.2		1	0		0.714286	0.285714		0.5	0.5		1	0		0.811905	0.0774084	0.188095	0.0774084
			0.857143	0.142857		0.8	0.2		0.833333	0.166667		0.714286	0.285714		0.333333	0.666667		0.833333	0.166667		0.728571	0.0816497	0.271429	0.0816497
			0.571429	0.428571		0.6	0.4		0.666667	0.333333		0.571429	0.428571		0.5	0.5		0.666667	0.333333		0.596032	0.0260941	0.403968	0.0260941
			0.571429	0.428571		0.6	0.4		0.666667	0.333333		0.571429	0.428571		0.5	0.5		0.666667	0.333333		0.596032	0.0260941	0.403968	0.0260941
			0.571429	0.428571		0.4	0.6		0.333333	0.666667		0.285714	0.714286		0.6	0.4		0.666667	0.333333		0.47619	0.0640767	0.52381	0.0640767
			0.428571	0.571429		0.4	0.6		0.333333	0.666667		0.285714	0.714286		0.333333	0.666667		0.5	0.5		0.380159	0.0318352	0.619841	0.0318352
			0.285714	0.714286		0.4	0.6		0.166667	0.833333		0.142857	0.857143		0.333333	0.666667		0.5	0.5		0.304762	0.0558721	0.695238	0.0558721
			0.142857	0.857143		0.4	0.6		0.166667	0.833333		0.142857	0.857143		0.2	0.8		0.5	0.5		0.25873	0.0624357	0.74127	0.0624357
			0.142857	0.857143		0.4	0.6		0.166667	0.833333		0.142857	0.857143		0.333333	0.666667		0.333333	0.666667		0.253175	0.0469865	0.746825	0.0469865
			0.142857	0.857143		0.4	0.6		0.166667	0.833333		0.142857	0.857143		0.333333	0.666667		0.333333	0.666667		0.253175	0.0469865	0.746825	0.0469865
			W%	C%		W%	S%		W%	S%		W%	S%		W%	S%		W%	S%		W%		S%

## Sheet: location of each stages
		Raw data
		G1N1
				DT	C	S	R
		location	nest	67	9	40	12
			Total	155	27	63	12
		G1N2
				DT	C	S	R
		location	nest	26	9	16	1
			Total	104	37	25	2
		G1N3
				DT	C	S	R
		location	nest	25	32	46	22
			Total	150	45	51	22
		G2N3
				DT	C	S	R
		location	nest	25	13	36	20
			Total	135	39	42	21
		G4N3
				DT	C	S	R
		location	nest	10	1	46	26
			Total	124	29	59	26
		G4N7
				DT	C	S	R
		location	nest	15	5	41	25
			Total	95	20	49	28
		G4N8
				DT	C	S	R
		location	nest	89	13	70	41
			Total	138	26	109	54
analysis
		nest/toatl		DT	C	S	R
			G1N1	0.432258	0.333333	0.634921	1				one-way anova repeated
			G1N2	0.25	0.243243	0.64	0.5			DT C	1
			G1N3	0.166667	0.711111	0.901961	1			DT S	0.000458927
			G2N3	0.185185	0.333333	0.857143	0.952381			DT R	3.57715e-05
			G4N3	0.0806452	0.0344828	0.779661	1			C S	0.0023
			G4N7	0.157895	0.25	0.836735	0.892857			C R	0.000162216
			G4N8	0.644928	0.5	0.642202	0.759259			S R	1
			AVE	SEM		G1N1	G1N2	G1N3	G2N3	G4N3	G4N7	G4N8
		DT	0.27394	0.0745596		0.432258	0.25	0.166667	0.185185	0.0806452	0.157895	0.644928
		C	0.343643	0.0807881		0.333333	0.243243	0.711111	0.333333	0.0344828	0.25	0.5
		S	0.756089	0.0435558		0.634921	0.64	0.901961	0.857143	0.779661	0.836735	0.642202
		R	0.872071	0.070228		1	0.5	1	0.952381	1	0.892857	0.759259

## Sheet: day and night comparision
OXMC mice											OX mice
DOX - 4w											DOX - 4w
Total time											Total time
MIN				MIN
C	Dark	Light		DT	Dark	Light					C	Dark	Light
N1	35.8667	20.9333		N1	26.3333	25.2					N1	748	245
N2	28	25.5333		N2	17.8	12.8					N2	572	420
N3	40.4	42.2667		N3	35.8	12.3333					N3	672	224
N4	26.4667	37.4		N4	28.6667	8.2					N4	652	416
N5	44.5333	8.66667		N5	22.1333	8.93333
N6	16.9333	15		N6	17.7333	7
N7	26.2	19.4		N7	24.0667	11.8667
AVE	AVE	AVE			C	DT					AVE	AVE	AVE			C
MIN	Dark	Light		T test	0.260207	0.00611857					MIN	Dark	Light		T test	0.028113
C	31.2	24.1714									C	11.0167	5.4375
DT	24.6476	12.3333
SEM	Dark	Light									SEM	Dark	Light
C	3.6035	4.53046									C	0.602695	0.885855
DT	2.41388	2.30463
Bouts											Bouts
bouts				bouts							bouts
C	Dark	Light		DT	Dark	Light					C	Dark	Light
N1	15	11		N1	104	77					N1	17	8
N2	20	16		N2	84	33					N2	9	8
N3	19	25		N3	116	40					N3	18	5
N4	14	28		N4	122	28					N4	15	12
N5	27	5		N5	92	31
N6	12	9		N6	75	25
N7	11	15		N7	98	44
AVE	AVE	AVE			C	DT					AVE	AVE	AVE			C
bouts	Dark	Light		T test	0.772873	0.000326473					bouts	Dark	Light		T test	0.099365
C	16.8571	15.5714									C	14.75	8.25
DT	98.7143	39.7143
SEM	Dark	Light									SEM	Dark	Light
C	2.10926	3.1612									C	2.01556	1.43614
DT	6.34978	6.69653
Duration											Duration
SEC				SEC							SEC
C	Dark	Light		DT	Dark	Light					C	Dark	Light
N1	143	114		N1	15	19					N1	76	32
N2	84	95		N2	12	23					N2	45	46
N3	127	101		N3	18	18					N3	45	39
N4	113	83		N4	14	17					N4	47	83
N5	98	104		N5	14	17
N6	84	100		N6	14	16
N7	142	77		N7	14	16
AVE	AVE	AVE			C	DT					AVE	AVE	AVE			C
bouts	Dark	Light		T test	0.180087	0.0357745					bouts	Dark	Light		T test	0.855563
C	113	96.2857									C	53.25	50
DT	14.4286	18
SEM	Dark	Light									SEM	Dark	Light
C	9.56681	4.77949									C	7.59797	11.3652
DT	0.685119	0.92582

## Sheet: behaviro before stage
						G1N1				G1N2				G1N3				G2N3
						DT	C			DT	C			DT	C			DT	C
				Grooming	face	16	2	Grooming	face	1	0	Grooming	face	4	13	Grooming	face	5	5
					ass	0	1		ass	1	0		ass	0	0		ass	0	0
	Raw data				leg	10	1		leg	1	0		leg	1	2		leg	1	4
				running	right after	66	8	running	right after	51	15	running	right after	65	3	running	right after	41	7
					struggle	34	4		struggle	44	17		struggle	53	7		struggle	65	11
				eating		15	0	eating		2	2	eating		1	1	eating		4	1
				dringking		1	1	dringking		0	0	dringking		1	0	dringking		0	1
				digging		20	2	digging		4	1	digging		12	11	digging		19	8
				other	search	7	0	other	search	3	0	other	search	4	3	other	search	0	0
					nothing	0	1		nothing	0	2		nothing	2	2		nothing	2	1
					climbing				climbing				climbing				climbing
						G4N3				G4N7				G4N8
						DT	C			DT	C			DT	C			DT	C
				Grooming	face	0	0	Grooming	face	6	3	Grooming	face	9	6	Grooming	face
					ass	0	0		ass	0	0		ass	0	0		ass
					leg	0	0		leg	3	2		leg	4	1		leg
				running	right after	39	9	running	right after	29	2	running	right after	58	5	running	right after
					struggle	47	18		struggle	42	7		struggle	48	10		struggle
				eating		9	0	eating		6	0	eating		4	0	eating
				dringking		1	0	dringking		1	0	dringking		1	0	dringking
				digging		18	0	digging		3	0	digging		15	3	digging
				other	search	2	2	other	search	1	2	other	search	1	0	other	search
					nothing	3	1		nothing	5	4		nothing	4	0		nothing
					climbing				climbing				climbing	1	1		climbing
						G1N1				G1N2				G1N3				G2N3
						DT	C			DT	C			DT	C			DT	C
				Grooming	face	0.0946746	0.1	Grooming	face	0.00934579	0	Grooming	face	0.027972	0.309524	Grooming	face	0.0364964	0.131579
					ass	0	0.05		ass	0.00934579	0		ass	0	0		ass	0	0
	Ratio				leg	0.0591716	0.05		leg	0.00934579	0		leg	0.00699301	0.047619		leg	0.00729927	0.105263
				running	right after	0.390533	0.4	running	right after	0.476636	0.405405	running	right after	0.454545	0.0714286	running	right after	0.29927	0.184211
					struggle	0.201183	0.2		struggle	0.411215	0.459459		struggle	0.370629	0.166667		struggle	0.474453	0.289474
				eating		0.0887574	0	eating		0.0186916	0.0540541	eating		0.00699301	0.0238095	eating		0.0291971	0.0263158
				dringking		0.00591716	0.05	dringking		0	0	dringking		0.00699301	0	dringking		0	0.0263158
				digging		0.118343	0.1	digging		0.0373832	0.027027	digging		0.0839161	0.261905	digging		0.138686	0.210526
				other	search	0.0414201	0	other	search	0.0280374	0	other	search	0.027972	0.0714286	other	search	0	0
					nothing	0	0.05		nothing	0	0.0540541		nothing	0.013986	0.047619		nothing	0.0145985	0.0263158
					climbing	0	0		climbing	0	0		climbing	0	0		climbing	0	0
						G4N3				G4N7				G4N8
						DT	C			DT	C			DT	C			DT	C
				Grooming	face	0	0	Grooming	face	0.0625	0.15	Grooming	face	0.062069	0.230769	Grooming	face
					ass	0	0		ass	0	0		ass	0	0		ass
					leg	0	0		leg	0.03125	0.1		leg	0.0275862	0.0384615		leg
				running	right after	0.327731	0.3	running	right after	0.302083	0.1	running	right after	0.4	0.192308	running	right after
					struggle	0.394958	0.6		struggle	0.4375	0.35		struggle	0.331034	0.384615		struggle
				eating		0.0756303	0	eating		0.0625	0	eating		0.0275862	0	eating
				dringking		0.00840336	0	dringking		0.0104167	0	dringking		0.00689655	0	dringking
				digging		0.151261	0	digging		0.03125	0	digging		0.103448	0.115385	digging
				other	search	0.0168067	0.0666667	other	search	0.0104167	0.1	other	search	0.00689655	0	other	search
					nothing	0.0252101	0.0333333		nothing	0.0520833	0.2		nothing	0.0275862	0		nothing
					climbing	0	0		climbing	0	0		climbing	0.00689655	0.0384615		climbing
						G1N1	G1N2	G1N3	G2N3	G4N3	G4N7	G4N8				G1N1	G1N2	G1N3	G2N3	G4N3	G4N7	G4N8
						DT	DT	DT	DT	DT	DT	DT		AVE	SEM	DT	DT	DT	DT	DT	DT	DT			AVE	SEM		T test
				Grooming	face	0.0946746	0.00934579	0.027972	0.0364964	0	0.0625	0.062069		0.0418654	0.0125877	0.153846	0.0280374	0.034965	0.0437956	0	0.09375	0.0896552		grooming	0.0634356	0.0196723	grooming	0.0384044
					ass	0	0.00934579	0	0	0	0	0		0.00133511	0.00133511									running	0.75311	0.0270426	running	0.0306489
	Analysis				leg	0.0591716	0.00934579	0.00699301	0.00729927	0	0.03125	0.0275862		0.0202351	0.00781047									eating	0.0441936	0.0117961	eating	0.156911
				running	right after	0.390533	0.476636	0.454545	0.29927	0.327731	0.302083	0.4		0.378685	0.0270426	0.390533	0.476636	0.454545	0.29927	0.327731	0.302083	0.4		dringking	0.00551811	0.00152327	dringking	0.527508
					struggle	0.201183	0.411215	0.370629	0.474453	0.394958	0.4375	0.331034		0.374425	0.0336894									digging	0.0948982	0.0177258	digging	0.855847
				eating		0.0887574	0.0186916	0.00699301	0.0291971	0.0756303	0.0625	0.0275862		0.0441936	0.0117961	0.0887574	0.0186916	0.00699301	0.0291971	0.0756303	0.0625	0.0275862		other	0.0388443	0.00545656	other	0.425644
				dringking		0.00591716	0	0.00699301	0	0.00840336	0.0104167	0.00689655		0.00551811	0.00152327	0.00591716	0	0.00699301	0	0.00840336	0.0104167	0.00689655
				digging		0.118343	0.0373832	0.0839161	0.138686	0.151261	0.03125	0.103448		0.0948982	0.0177258	0.118343	0.0373832	0.0839161	0.138686	0.151261	0.03125	0.103448
				other	search	0.0414201	0.0280374	0.027972	0	0.0168067	0.0104167	0.00689655		0.0187928	0.00545656	0.0414201	0.0280374	0.027972	0	0.0168067	0.0104167	0.00689655
					nothing	0	0	0.013986	0.0145985	0.0252101	0.0520833	0.0275862		0.0190663	0.0068544
					climbing	0	0	0	0	0	0	0.00689655		0.000985222	0.000985222
						G1N1	G1N2	G1N3	G2N3	G4N3	G4N7	G4N8
						C	C	C	C	C	C	C		AVE	SEM	C	C	C	C	C	C	C			AVE	SEM
				Grooming	face	0.1	0	0.309524	0.131579	0	0.15	0.230769		0.131696	0.0429467	0.2	0	0.357143	0.236842	0	0.25	0.269231		grooming	0.187602	0.0517016
					ass	0.05	0	0	0	0	0	0		0.00714286	0.00714286									running	0.586224	0.0511443
					leg	0.05	0	0.047619	0.105263	0	0.1	0.0384615		0.0487634	0.0159479									eating	0.0148828	0.00791439
				running	right after	0.4	0.405405	0.0714286	0.184211	0.3	0.1	0.192308		0.236193	0.0511443	0.4	0.405405	0.0714286	0.184211	0.3	0.1	0.192308		dringking	0.0109023	0.00749684
					struggle	0.2	0.459459	0.166667	0.289474	0.6	0.35	0.384615		0.350031	0.05679									digging	0.10212	0.0390236
				eating		0	0.0540541	0.0238095	0.0263158	0	0	0		0.0148828	0.00791439	0	0.0540541	0.0238095	0.0263158	0	0	0		other	0.0982684	0.0165097
				dringking		0.05	0	0	0.0263158	0	0	0		0.0109023	0.00749684	0.05	0	0	0.0263158	0	0	0
				digging		0.1	0.027027	0.261905	0.210526	0	0	0.115385		0.10212	0.0390236	0.1	0.027027	0.261905	0.210526	0	0	0.115385
				other	search	0	0	0.0714286	0	0.0666667	0.1	0		0.0340136	0.0165097	0	0	0.0714286	0	0.0666667	0.1	0
					nothing	0.05	0.0540541	0.047619	0.0263158	0.0333333	0.2	0		0.0587603	0.0245549
					climbing	0	0	0	0	0	0	0.0384615		0.00549451	0.00549451
