# Supplementary material for: Dual orexin and MCH neuron-ablated mice display severe sleep attacks and cataplexy
Source: eLife. 2020 Apr 21;9:e54275. doi: 10.7554/eLife.54275 (PMC7173968; doi:10.7554/eLife.54275)
Supplement: Figure 7—source data 1. [file elife-54275-fig7-data1.xlsx]

## Sheet: total time
		Vehicle								Experiment
	W	20:00:00	21:00:00	22:00:00	23:00:00	1900-01-01	1900-01-01 01:00:00		W	20:00:00	21:00:00	22:00:00	23:00:00	1900-01-01	1900-01-01 01:00:00
	G1N1	2976	3052	2936	2480	2872	2796		G1N1	3004	2792	2920	2956	3076	2996
	G1N2	2848	3012	2808	3028	2816	2980		G1N2	2972	2820	2800	2880	2964	2804
	G2N1	3060	3100	2028	2900	1692	1748		G2N1	3068	3040	3368	3124	3164	3324
	G2N2	3132	3120	2644	2708	2604	2124		G2N2	3240	2936	3264	3084	3188	3048
	G2N3	2904	3072	2892	2448	2476	2488		G2N3	2916	2988	2952	2816	3172	3056
	G3N1	2864	2584	2644	2280	1480	1316		G3N1	3488	3416	3240	3552	3220	3268
	G3N2	3072	3048	2764	2268	2716	1852		G3N2	3304	3156	3108	3012	2892	3380
	G3N3	3116	3148	2924	2468	3032	3044		G3N3	2872	2872	2836	2968	2952	2800
	R	22:00:00	23:00:00	1900-01-01	1900-01-01 01:00:00	1900-01-01 02:00:00	1900-01-01 03:00:00		R	22:00:00	23:00:00	1900-01-01	1900-01-01 01:00:00	1900-01-01 02:00:00	1900-01-01 03:00:00
	G1N1	0	44	0	0	0	0		G1N1	0	0	0	0	4	4
	G1N2	4	0	0	0	0	0		G1N2	0	0	0	0	0	0
	G2N1	0	0	88	0	300	308		G2N1	0	0	0	0	0	0
	G2N2	0	0	0	28	4	116		G2N2	0	0	0	4	0	0
	G2N3	0	0	0	136	292	248		G2N3	0	0	0	0	0	0
	G3N1	0	0	0	0	276	232		G3N1	0	0	0	0	0	4
	G3N2	0	0	32	28	52	148		G3N2	0	0	0	0	0	0
	G3N3	88	0	0	0	0	0		G3N3	0	0	0	0	0	0
	NR	22:00:00	23:00:00	1900-01-01	1900-01-01 01:00:00	1900-01-01 02:00:00	1900-01-01 03:00:00		NR	22:00:00	23:00:00	1900-01-01	1900-01-01 01:00:00	1900-01-01 02:00:00	1900-01-01 03:00:00
	G1N1	0	124	0	760	16	128		G1N1	0	0	0	0	0	0
	G1N2	0	0	160	12	0	0		G1N2	0	24	0	100	20	76
	G2N1	236	260	1112	548	1608	1544		G2N1	508	368	20	48	132	104
	G2N2	0	60	580	460	604	1260		G2N2	56	244	0	40	0	112
	G2N3	0	48	284	960	768	828		G2N3	0	0	0	20	0	0
	G3N1	304	740	476	1152	1828	2052		G3N1	24	0	64	48	188	92
	G3N2	100	296	424	1000	704	1412		G3N2	0	52	24	0	32	12
	G3N3	148	0	36	852	8	32		G3N3	0	0	0	0	0	92
	DT	22:00:00	23:00:00	1900-01-01	1900-01-01 01:00:00	1900-01-01 02:00:00	1900-01-01 03:00:00		DT	22:00:00	23:00:00	1900-01-01	1900-01-01 01:00:00	1900-01-01 02:00:00	1900-01-01 03:00:00
	G1N1	212	204	152	80	56	80		G1N1	16	84	100	316	128	204
	G1N2	76	136	164	140	272	12		G1N2	148	256	136	152	128	260
	G2N1	56	28	12	64	0	0		G2N1	0	48	0	60	104	60
	G2N2	156	88	196	148	124	40		G2N2	32	52	100	32	88	0
	G2N3	80	152	196	56	64	36		G2N3	192	140	84	12	92	88
	G3N1	64	0	0	0	16	0		G3N1	24	12	0	0	0	16
	G3N2	124	96	84	88	28	0		G3N2	12	0	0	108	76	44
	G3N3	32	212	104	100	256	164		G3N3	12	40	80	44	24	12
	C	22:00:00	23:00:00	1900-01-01	1900-01-01 01:00:00	1900-01-01 02:00:00	1900-01-01 03:00:00		C	22:00:00	23:00:00	1900-01-01	1900-01-01 01:00:00	1900-01-01 02:00:00	1900-01-01 03:00:00
	G1N1	412	176	512	280	656	596		G1N1	580	724	580	328	392	396
	G1N2	672	452	468	420	512	608		G1N2	480	500	664	468	488	460
	G2N1	248	212	360	88	0	0		G2N1	24	144	212	368	200	112
	G2N2	312	332	180	256	264	60		G2N2	272	368	236	440	324	440
	G2N3	616	328	228	0	0	0		G2N3	492	472	564	752	336	456
	G3N1	368	276	480	168	0	0		G3N1	64	172	296	0	192	220
	G3N2	304	160	296	216	100	188		G3N2	284	392	468	480	600	164
	G3N3	216	240	536	180	304	360		G3N3	716	688	684	588	624	696
	W	Vehicle		Experiment		R	Vehicle		Experiment		NR	Vehicle		Experiment		DT	Vehicle		Experiment		C	Vehicle		Experiment
		AVE	SEM	AVE	SEM		AVE	SEM	AVE	SEM		AVE	SEM	AVE	SEM		AVE	SEM	AVE	SEM		AVE	SEM	AVE	SEM
	1-6 hr	267.425	9.15581	306.392	5.98595	1-6 hr	5.05	1.67288	0.0333333	0.0178174	1-6 hr	49.8417	13.0667	5.20833	2.29321	1-6 hr	9.26667	1.79554	7.53333	2.10393	1-6 hr	28.4167	4.6118	40.8333	6.21717
		W	R	NR	DT	C
	T tes	0.0354014	0.0202622	0.00709613	0.374481	0.0544374

## Sheet: Bouts
		Vehicle								Experiment
	W	20:00:00	21:00:00	22:00:00	23:00:00	1900-01-01	1900-01-01 01:00:00		W	20:00:00	21:00:00	22:00:00	23:00:00	1900-01-01	1900-01-01 01:00:00
	G1N1	20	20	13	19	15	15		G1N1	11	19	16	23	19	18
	G1N2	16	14	13	15	23	10		G1N2	17	25	22	22	19	21
	G2N1	14	14	24	18	21	28		G2N1	23	17	6	16	17	17
	G2N2	14	17	28	27	22	20		G2N2	10	20	13	16	11	16
	G2N3	13	18	19	32	39	39		G2N3	13	16	9	9	14	14
	G3N1	18	23	16	22	21	25		G3N1	8	5	7	5	10	10
	G3N2	19	26	24	27	22	24		G3N2	5	11	18	19	17	8
	G3N3	14	19	13	19	24	18		G3N3	13	18	16	15	13	14
	R	22:00:00	23:00:00	1900-01-01	1900-01-01 01:00:00	1900-01-01 02:00:00	1900-01-01 03:00:00		R	22:00:00	23:00:00	1900-01-01	1900-01-01 01:00:00	1900-01-01 02:00:00	1900-01-01 03:00:00
	G1N1	0	1	0	0	0	0		G1N1	0	0	0	0	1	1
	G1N2	1	0	0	0	0	0		G1N2	0	0	0	0	0	0
	G2N1	0	0	3	0	5	3		G2N1	0	0	0	0	0	0
	G2N2	0	0	0	2	1	4		G2N2	0	0	0	1	0	0
	G2N3	0	0	0	8	12	7		G2N3	0	0	0	0	0	0
	G3N1	0	0	0	0	3	3		G3N1	0	0	0	0	0	1
	G3N2	0	0	1	2	1	2		G3N2	0	0	0	0	0	0
	G3N3	1	0	0	0	0	0		G3N3	0	0	0	0	0	0
	S	22:00:00	23:00:00	1900-01-01	1900-01-01 01:00:00	1900-01-01 02:00:00	1900-01-01 03:00:00		S	22:00:00	23:00:00	1900-01-01	1900-01-01 01:00:00	1900-01-01 02:00:00	1900-01-01 03:00:00
	G1N1	0	4	0	7	1	3		G1N1	0	0	0	0	0	0
	G1N2	0	0	4	1	0	0		G1N2	0	1	0	3	1	1
	G2N1	7	9	18	14	22	28		G2N1	20	12	1	3	6	7
	G2N2	0	4	14	15	12	18		G2N2	3	10	0	3	0	6
	G2N3	0	2	3	28	31	33		G2N3	0	0	0	1	0	0
	G3N1	8	18	10	20	20	24		G3N1	2	0	3	4	7	6
	G3N2	6	13	17	22	16	21		G3N2	0	3	2	0	2	1
	G3N3	8	0	2	7	2	1		G3N3	0	0	0	0	0	1
	DT	22:00:00	23:00:00	1900-01-01	1900-01-01 01:00:00	1900-01-01 02:00:00	1900-01-01 03:00:00		DT	22:00:00	23:00:00	1900-01-01	1900-01-01 01:00:00	1900-01-01 02:00:00	1900-01-01 03:00:00
	G1N1	12	11	8	6	4	5		G1N1	1	6	7	16	8	7
	G1N2	6	7	3	8	17	1		G1N2	9	14	10	9	9	11
	G2N1	4	2	1	4	0	0		G2N1	0	3	0	4	7	4
	G2N2	10	6	11	8	6	2		G2N2	2	3	6	2	6	0
	G2N3	6	12	12	2	5	3		G2N3	7	9	4	1	6	7
	G3N1	5	0	0	0	1	0		G3N1	1	1	0	0	0	1
	G3N2	9	6	4	4	2	0		G3N2	1	0	0	7	5	3
	G3N3	2	14	6	8	19	12		G3N3	1	3	4	2	2	1
	C	22:00:00	23:00:00	1900-01-01	1900-01-01 01:00:00	1900-01-01 02:00:00	1900-01-01 03:00:00		C	22:00:00	23:00:00	1900-01-01	1900-01-01 01:00:00	1900-01-01 02:00:00	1900-01-01 03:00:00
	G1N1	7	4	4	5	10	7		G1N1	9	12	9	6	9	10
	G1N2	8	6	6	6	5	9		G1N2	7	10	11	9	8	8
	G2N1	2	2	4	1	0	0		G2N1	2	1	4	9	3	5
	G2N2	3	6	2	2	2	1		G2N2	5	7	6	9	4	9
	G2N3	7	4	4	0	0	0		G2N3	5	7	5	7	8	6
	G3N1	5	5	5	1	0	0		G3N1	4	4	3	0	2	3
	G3N2	3	6	2	2	4	2		G3N2	3	8	15	11	9	3
	G3N3	3	4	4	3	3	4		G3N3	11	14	12	12	10	12
	W	Vehicle		Experiment		R	Vehicle		Experiment		NR	Vehicle		Experiment		DT	Vehicle		Experiment		C	Vehicle		Experiment
		AVE	SEM	AVE	SEM		AVE	SEM	AVE	SEM		AVE	SEM	AVE	SEM		AVE	SEM	AVE	SEM		AVE	SEM	AVE	SEM
	1-6 hr	121.75	7.88704	87.625	8.40267	1-6 hr	7.5	3.05894	0.5	0.267261	1-6 hr	61.625	14.8058	13.625	5.955	1-6 hr	34.25	6.611	26.25	6.855	1-6 hr	21.625	3.8911	43.25	6.25
		W	R	NR	DT	C
	T tes	0.0545023	0.0621007	0.00703621	0.306354	0.00401644

## Sheet: Duration
		Vehicle								Experiment
	W	20:00:00	21:00:00	22:00:00	23:00:00	1900-01-01	1900-01-01 01:00:00		W	20:00:00	21:00:00	22:00:00	23:00:00	1900-01-01	1900-01-01 01:00:00
	G1N1	148	152	225	130	191	186		G1N1	273	146	182	128	161	166
	G1N2	178	215	216	201	122	298		G1N2	174	112	127	130	156	133
	G2N1	218	221	84	161	80	62		G2N1	133	178	561	195	186	195
	G2N2	223	183	94	100	118	106		G2N2	324	146	251	192	289	190
	G2N3	223	170	152	76	63	63		G2N3	224	186	328	312	226	218
	G3N1	159	112	165	103	70	52		G3N1	436	683	462	710	322	326
	G3N2	161	117	115	84	123	77		G3N2	660	286	172	158	170	422
	G3N3	222	165	224	129	126	169		G3N3	220	159	177	197	227	200
	R	22:00:00	23:00:00	1900-01-01	1900-01-01 01:00:00	1900-01-01 02:00:00	1900-01-01 03:00:00		R	22:00:00	23:00:00	1900-01-01	1900-01-01 01:00:00	1900-01-01 02:00:00	1900-01-01 03:00:00
	G1N1	0	44	0	0	0	0		G1N1	0	0	0	0	4	4
	G1N2	4	0	0	0	0	0		G1N2	0	0	0	0	0	0
	G2N1	0	0	29	0	60	102		G2N1	0	0	0	0	0	0
	G2N2	0	0	0	14	4	29		G2N2	0	0	0	4	0	0
	G2N3	0	0	0	17	24	35		G2N3	0	0	0	0	0	0
	G3N1	0	0	0	0	92	77		G3N1	0	0	0	0	0	4
	G3N2	0	0	32	14	52	74		G3N2	0	0	0	0	0	0
	G3N3	88	0	0	0	0	0		G3N3	0	0	0	0	0	0
	S	22:00:00	23:00:00	1900-01-01	1900-01-01 01:00:00	1900-01-01 02:00:00	1900-01-01 03:00:00		S	22:00:00	23:00:00	1900-01-01	1900-01-01 01:00:00	1900-01-01 02:00:00	1900-01-01 03:00:00
	G1N1	0	31	0	108	16	42		G1N1	0	0	0	0	0	0
	G1N2	0	0	40	12	0	0		G1N2	0	24	0	33	20	76
	G2N1	33	28	61	39	73	55		G2N1	25	30	20	16	22	14
	G2N2	0	15	41	30	50	70		G2N2	18	24	0	13	0	18
	G2N3	0	24	94	34	24	25		G2N3	0	0	0	20	0	0
	G3N1	38	41	47	57	91	85		G3N1	12	0	21	12	26	15
	G3N2	16	22	24	45	44	67		G3N2	0	17	12	0	16	12
	G3N3	18	0	18	121	4	32		G3N3	0	0	0	0	0	92
	DT	22:00:00	23:00:00	1900-01-01	1900-01-01 01:00:00	1900-01-01 02:00:00	1900-01-01 03:00:00		DT	22:00:00	23:00:00	1900-01-01	1900-01-01 01:00:00	1900-01-01 02:00:00	1900-01-01 03:00:00
	G1N1	17	18	19	13	14	16		G1N1	16	14	14	19	16	29
	G1N2	12	19	54	17	16	12		G1N2	16	18	13	16	14	23
	G2N1	14	14	12	16	0	0		G2N1	0	16	0	15	14	15
	G2N2	15	14	17	18	20	20		G2N2	16	17	16	16	14	0
	G2N3	13	12	16	28	12	12		G2N3	27	15	21	12	15	12
	G3N1	12	0	0	0	16	0		G3N1	24	12	0	0	0	16
	G3N2	13	16	21	22	14	0		G3N2	12	0	0	15	15	14
	G3N3	16	15	17	12	13	13		G3N3	12	13	20	22	12	12
	C	22:00:00	23:00:00	1900-01-01	1900-01-01 01:00:00	1900-01-01 02:00:00	1900-01-01 03:00:00		C	22:00:00	23:00:00	1900-01-01	1900-01-01 01:00:00	1900-01-01 02:00:00	1900-01-01 03:00:00
	G1N1	58	44	128	56	65	85		G1N1	64	60	64	54	43	39
	G1N2	84	75	78	70	102	67		G1N2	68	50	60	52	61	57
	G2N1	124	106	90	88	0	0		G2N1	12	144	53	40	66	22
	G2N2	104	55	90	128	132	60		G2N2	54	52	39	48	81	48
	G2N3	88	82	57	0	0	0		G2N3	98	67	112	107	42	76
	G3N1	73	55	96	168	0	0		G3N1	16	43	98	0	96	73
	G3N2	101	26	148	108	25	94		G3N2	94	49	31	43	66	54
	G3N3	72	60	134	60	101	90		G3N3	65	49	57	49	62	58
	W	Vehicle		Experiment		R	Vehicle		Experiment		NR	Vehicle		Experiment		DT	Vehicle		Experiment		C	Vehicle		Experiment
		AVE	SEM	AVE	SEM		AVE	SEM	AVE	SEM		AVE	SEM	AVE	SEM		AVE	SEM	AVE	SEM		AVE	SEM	AVE	SEM
	1-6 hr	146.5	11.8383	254.354	38.3233	1-6 hr	16.4792	4.11256	0.333333	0.178174	1-6 hr	35.7292	5.16935	12.6667	3.00198	1-6 hr	14.1667	1.82112	13.5	1.3255	1-6 hr	73.4792	6.15672	59.0833	3.55093
		W	R	NR	DT	C
	T tes	0.0607439	0.00604562	0.00885091	0.608407	0.164999
