# Supplementary material for: Dual orexin and MCH neuron-ablated mice display severe sleep attacks and cataplexy
Source: eLife. 2020 Apr 21;9:e54275. doi: 10.7554/eLife.54275 (PMC7173968; doi:10.7554/eLife.54275)
Supplement: Figure 8—source data 1. [file elife-54275-fig8-data1.xlsx]

## Sheet: total time
		Vehicle								Experiment
	W	20:00:00	21:00:00	22:00:00	23:00:00	1900-01-01	1900-01-01 01:00:00		W	20:00:00	21:00:00	22:00:00	23:00:00	1900-01-01	1900-01-01 01:00:00
	G1N1	3024	2952	3104	1868	1840	2600		G1N1	1924	1764	2452	2760	2548	2152
	G1N2	2744	2916	2796	2856	2816	3092		G1N2	3452	3540	3328	2924	2844	2700
	G2N1	2648	2584	2324	2468	2228	2452		G2N1	1152	1856	1800	1772	1880	2648
	G2N2	3020	2696	3132	2276	2608	1512		G2N2	1328	1384	2396	2176	2436	2096
	G2N3	3116	2936	2708	2468	2732	2904		G2N3	2828	3344	2844	3304	3252	3096
	G3N1	2456	2496	2148	1668	1724	1984		G3N1	1336	1876	1956	1904	2508	2616
	G3N2	2952	1896	2608	2000	2240	2948		G3N2	1516	1124	1408	1824	2016	2720
	G3N3	1476	2316	2040	1224	2344	1860		G3N3	396	1536	1532	2692	2216	2460
	R	22:00:00	23:00:00	1900-01-01	1900-01-01 01:00:00	1900-01-01 02:00:00	1900-01-01 03:00:00		R	22:00:00	23:00:00	1900-01-01	1900-01-01 01:00:00	1900-01-01 02:00:00	1900-01-01 03:00:00
	G1N1	0	0	0	84	0	0		G1N1	0	0	0	0	28	0
	G1N2	0	0	0	0	0	0		G1N2	0	0	0	0	0	0
	G2N1	260	188	248	88	36	44		G2N1	0	0	0	96	148	28
	G2N2	212	308	0	244	100	180		G2N2	0	0	20	32	0	92
	G2N3	0	0	0	0	0	0		G2N3	0	0	0	0	0	0
	G3N1	232	104	200	80	240	208		G3N1	0	0	0	0	32	0
	G3N2	120	252	60	256	152	316		G3N2	0	0	4	44	316	28
	G3N3	272	116	244	372	128	420		G3N3	0	0	0	0	28	204
	S	22:00:00	23:00:00	1900-01-01	1900-01-01 01:00:00	1900-01-01 02:00:00	1900-01-01 03:00:00		S	22:00:00	23:00:00	1900-01-01	1900-01-01 01:00:00	1900-01-01 02:00:00	1900-01-01 03:00:00
	G1N1	136	316	104	1544	1268	404		G1N1	1676	1788	980	492	680	1156
	G1N2	28	176	100	4	184	0		G1N2	0	48	112	172	308	648
	G2N1	672	540	956	704	1068	788		G2N1	2448	1732	1800	1720	1572	712
	G2N2	364	592	96	908	676	1676		G2N2	2264	2204	1184	1276	796	1264
	G2N3	204	48	508	864	360	88		G2N3	772	236	356	0	0	0
	G3N1	912	988	1160	1540	1636	1408		G3N1	2264	1724	1644	1640	872	692
	G3N2	528	1368	748	1144	892	244		G3N2	2084	2452	2152	1664	1128	736
	G3N3	1852	1144	1288	1992	948	1292		G3N3	3204	2064	2068	896	1320	924
	DT	22:00:00	23:00:00	1900-01-01	1900-01-01 01:00:00	1900-01-01 02:00:00	1900-01-01 03:00:00		DT	22:00:00	23:00:00	1900-01-01	1900-01-01 01:00:00	1900-01-01 02:00:00	1900-01-01 03:00:00
	G1N1	88	116	140	104	108	128		G1N1	0	48	168	68	16	68
	G1N2	128	236	256	116	92	84		G1N2	120	12	0	128	156	100
	G2N1	20	16	12	40	0	0		G2N1	0	12	0	12	0	4
	G2N2	4	4	44	16	0	0		G2N2	8	12	0	28	76	0
	G2N3	24	144	24	64	56	108		G2N3	0	20	92	0	0	48
	G3N1	0	12	92	0	0	0		G3N1	0	0	0	56	0	0
	G3N2	0	0	24	56	120	72		G3N2	0	24	36	68	140	48
	G3N3	0	24	28	12	0	28		G3N3	0	0	0	12	36	12
	C	22:00:00	23:00:00	1900-01-01	1900-01-01 01:00:00	1900-01-01 02:00:00	1900-01-01 03:00:00		C	22:00:00	23:00:00	1900-01-01	1900-01-01 01:00:00	1900-01-01 02:00:00	1900-01-01 03:00:00
	G1N1	352	216	252	0	384	468		G1N1	0	0	0	280	328	224
	G1N2	700	272	448	624	508	424		G1N2	28	0	160	376	292	152
	G2N1	0	272	60	300	268	316		G2N1	0	0	0	0	0	208
	G2N2	0	0	328	156	216	232		G2N2	0	0	0	88	292	148
	G2N3	256	472	360	204	452	500		G2N3	0	0	308	296	348	456
	G3N1	0	0	0	312	0	0		G3N1	0	0	0	0	188	292
	G3N2	0	84	160	144	196	20		G3N2	0	0	0	0	0	68
	G3N3	0	0	0	0	180	0		G3N3	0	0	0	0	0	0
	W	Vehicle		Experiment		R	Vehicle		Experiment		NR	Vehicle		Experiment		DT	Vehicle		Experiment		C	Vehicle		Experiment
		AVE	SEM	AVE	SEM		AVE	SEM	AVE	SEM		AVE	SEM	AVE	SEM		AVE	SEM	AVE	SEM		AVE	SEM	AVE	SEM
	1-2 hr	87.975	4.4127	63.2417	10.6391	1-2 hr	4.3	1.29945	0	0	1-2 hr	20.5583	5.76532	56.1667	10.872	1-2 hr	1.7	0.775314	0.533333	0.254484	1-2 hr	5.46667	2.24687	0.0583333	0.0583333
		W	R	NR	DT	C
	T tes	0.1621	0.01465	0.0117	0.0767	0.17582

## Sheet: Bouts
		Vehicle								Experiment
	W	20:00:00	21:00:00	22:00:00	23:00:00	1900-01-01	1900-01-01 01:00:00		W	20:00:00	21:00:00	22:00:00	23:00:00	1900-01-01	1900-01-01 01:00:00
	G1N1	14	18	16	23	21	22		G1N1	22	22	16	16	13	16
	G1N2	23	22	24	15	15	11		G1N2	5	4	11	20	23	22
	G2N1	35	28	15	23	27	19		G2N1	20	24	23	20	15	13
	G2N2	18	14	10	23	15	25		G2N2	27	26	22	14	16	21
	G2N3	20	25	11	18	16	18		G2N3	19	5	14	6	6	5
	G3N1	18	22	19	17	15	24		G3N1	20	20	10	17	15	16
	G3N2	15	24	17	22	21	14		G3N2	23	23	19	13	17	15
	G3N3	17	20	21	21	19	19		G3N3	16	22	16	15	21	10
	R	22:00:00	23:00:00	1900-01-01	1900-01-01 01:00:00	1900-01-01 02:00:00	1900-01-01 03:00:00		R	22:00:00	23:00:00	1900-01-01	1900-01-01 01:00:00	1900-01-01 02:00:00	1900-01-01 03:00:00
	G1N1	0	0	0	2	0	0		G1N1	0	0	0	0	1	0
	G1N2	0	0	0	0	0	0		G1N2	0	0	0	0	0	0
	G2N1	6	7	1	1	4	2		G2N1	2	0	0	1	5	3
	G2N2	10	3	4	12	3	3		G2N2	0	0	0	3	0	1
	G2N3	7	9	0	0	0	0		G2N3	1	0	0	0	0	0
	G3N1	3	2	3	2	3	7		G3N1	0	0	0	0	1	0
	G3N2	7	3	2	7	3	3		G3N2	0	0	1	2	3	1
	G3N3	5	3	5	7	4	3		G3N3	0	0	0	0	1	2
	S	22:00:00	23:00:00	1900-01-01	1900-01-01 01:00:00	1900-01-01 02:00:00	1900-01-01 03:00:00		S	22:00:00	23:00:00	1900-01-01	1900-01-01 01:00:00	1900-01-01 02:00:00	1900-01-01 03:00:00
	G1N1	5	6	4	18	10	8		G1N1	22	18	7	4	7	9
	G1N2	2	3	4	1	3	0		G1N2	0	3	5	3	7	13
	G2N1	38	31	13	14	23	14		G2N1	17	23	24	20	16	11
	G2N2	18	16	7	15	7	20		G2N2	27	27	21	12	8	17
	G2N3	19	21	7	4	5	11		G2N3	16	4	9	0	0	0
	G3N1	16	21	16	15	15	26		G3N1	20	20	11	16	14	13
	G3N2	14	24	15	17	12	7		G3N2	22	22	16	11	14	11
	G3N3	15	18	19	21	17	17		G3N3	17	21	15	13	18	8
	DT	22:00:00	23:00:00	1900-01-01	1900-01-01 01:00:00	1900-01-01 02:00:00	1900-01-01 03:00:00		DT	22:00:00	23:00:00	1900-01-01	1900-01-01 01:00:00	1900-01-01 02:00:00	1900-01-01 03:00:00
	G1N1	5	8	9	5	6	8		G1N1	0	4	8	5	1	4
	G1N2	9	14	14	6	7	7		G1N2	3	1	0	8	11	6
	G2N1	0	1	1	1	1	3		G2N1	0	1	0	1	0	1
	G2N2	2	0	1	1	2	2		G2N2	1	0	1	0	5	1
	G2N3	0	0	0	9	4	4		G2N3	0	0	4	0	0	1
	G3N1	0	1	3	0	0	0		G3N1	0	0	0	2	0	0
	G3N2	0	0	2	3	6	5		G3N2	0	1	2	1	4	3
	G3N3	0	1	2	1	0	2		G3N3	0	0	0	1	2	1
	C	22:00:00	23:00:00	1900-01-01	1900-01-01 01:00:00	1900-01-01 02:00:00	1900-01-01 03:00:00		C	22:00:00	23:00:00	1900-01-01	1900-01-01 01:00:00	1900-01-01 02:00:00	1900-01-01 03:00:00
	G1N1	3	3	3	0	4	5		G1N1	0	0	0	6	4	2
	G1N2	11	5	5	7	5	4		G1N2	1	0	6	8	4	2
	G2N1	0	0	0	7	2	2		G2N1	0	0	0	0	0	1
	G2N2	0	0	0	0	3	3		G2N2	0	0	0	1	3	2
	G2N3	0	0	3	4	6	4		G2N3	1	0	0	6	6	3
	G3N1	0	0	0	2	0	0		G3N1	0	0	0	0	1	2
	G3N2	0	1	1	1	2	1		G3N2	0	0	0	0	0	1
	G3N3	0	0	0	0	1	0		G3N3	0	0	0	0	0	0
	W	Vehicle		Experiment		R	Vehicle		Experiment		NR	Vehicle		Experiment		DT	Vehicle		Experiment		C	Vehicle		Experiment
		AVE	SEM	AVE	SEM		AVE	SEM	AVE	SEM		AVE	SEM	AVE	SEM		AVE	SEM	AVE	SEM		AVE	SEM	AVE	SEM
	1-2 hr	41.625	3.5251	37.25	4.99553	1-2 hr	8.125	2.13339	0.375	0.263052	1-2 hr	33.375	6.88408	34.875	5.62976	1-2 hr	5.125	2.97272	1.375	0.595744	1-2 hr	2.875	2.01279	0.25	0.163663
		W	R	NR	DT	C
	T tes	0.0635447	0.00601	0.7702	0.03733	0.05524

## Sheet: Duration
		Vehicle								Experiment
	W	20:00:00	21:00:00	22:00:00	23:00:00	1900-01-01	1900-01-01 01:00:00		W	20:00:00	21:00:00	22:00:00	23:00:00	1900-01-01	1900-01-01 01:00:00
	G1N1	216	164	194	81	87	118		G1N1	87	80	153	172	196	134
	G1N2	119	132	116	190	187	281		G1N2	690	885	302	146	123	122
	G2N1	33	38	181	128	75	142		G2N1	102	63	69	100	125	161
	G2N2	43	185	299	129	185	100		G2N2	55	48	93	143	149	112
	G2N3	74	92	291	171	160	144		G2N3	148	682	216	513	544	640
	G3N1	136	113	113	98	114	82		G3N1	66	93	195	112	167	163
	G3N2	196	79	153	90	106	210		G3N2	65	48	74	140	118	181
	G3N3	86	115	97	58	123	97		G3N3	24	69	95	179	105	246
	R	22:00:00	23:00:00	1900-01-01	1900-01-01 01:00:00	1900-01-01 02:00:00	1900-01-01 03:00:00		R	22:00:00	23:00:00	1900-01-01	1900-01-01 01:00:00	1900-01-01 02:00:00	1900-01-01 03:00:00
	G1N1	0	0	0	42	0	0		G1N1	0	0	0	0	28	0
	G1N2	0	0	0	0	0	0		G1N2	0	0	0	0	0	0
	G2N1	36	31	244	16	105	16		G2N1	4	0	0	28	35	22
	G2N2	52	54	86	16	36	73		G2N2	0	0	0	17	0	92
	G2N3	26	16	0	0	0	0		G2N3	4	0	0	0	0	0
	G3N1	77	52	66	40	80	29		G3N1	0	0	0	0	32	0
	G3N2	17	84	30	36	50	105		G3N2	0	0	4	22	105	28
	G3N3	54	38	48	53	32	140		G3N3	0	0	0	0	28	102
	S	22:00:00	23:00:00	1900-01-01	1900-01-01 01:00:00	1900-01-01 02:00:00	1900-01-01 03:00:00		S	22:00:00	23:00:00	1900-01-01	1900-01-01 01:00:00	1900-01-01 02:00:00	1900-01-01 03:00:00
	G1N1	27	52	26	85	126	50		G1N1	76	99	140	123	97	128
	G1N2	14	58	25	4	61	0		G1N2	0	16	22	57	44	49
	G2N1	58	73	47	28	44	40		G2N1	90	89	83	78	96	117
	G2N2	126	52	36	27	56	31		G2N2	77	86	73	124	107	61
	G2N3	101	53	20	28	98	61		G2N3	45	47	50	0	0	0
	G3N1	57	47	72	102	109	54		G3N1	113	86	149	102	62	53
	G3N2	37	57	49	67	74	34		G3N2	94	111	134	151	80	66
	G3N3	123	63	67	94	55	76		G3N3	188	98	137	68	73	115
	DT	22:00:00	23:00:00	1900-01-01	1900-01-01 01:00:00	1900-01-01 02:00:00	1900-01-01 03:00:00		DT	22:00:00	23:00:00	1900-01-01	1900-01-01 01:00:00	1900-01-01 02:00:00	1900-01-01 03:00:00
	G1N1	17	14	15	20	18	16		G1N1	0	12	21	13	16	17
	G1N2	14	16	18	19	13	12		G1N2	40	12	0	16	14	16
	G2N1	0	8	20	16	12	13		G2N1	0	12	0	12	0	4
	G2N2	4	0	4	4	16	14		G2N2	8	0	12	0	17	16
	G2N3	0	0	0	14	15	16		G2N3	0	0	28	0	0	24
	G3N1	0	12	30	0	0	0		G3N1	0	0	0	28	0	0
	G3N2	0	0	12	18	20	14		G3N2	0	24	18	68	35	16
	G3N3	0	24	14	12	0	14		G3N3	0	0	0	12	18	12
	C	22:00:00	23:00:00	1900-01-01	1900-01-01 01:00:00	1900-01-01 02:00:00	1900-01-01 03:00:00		C	22:00:00	23:00:00	1900-01-01	1900-01-01 01:00:00	1900-01-01 02:00:00	1900-01-01 03:00:00
	G1N1	117	72	84	0	96	93		G1N1	0	0	0	46	82	112
	G1N2	63	54	89	89	101	106		G1N2	28	0	26	47	73	76
	G2N1	0	0	0	30	58	130		G2N1	0	0	0	0	0	136
	G2N2	0	0	0	0	96	65		G2N2	0	0	0	48	85	38
	G2N3	0	0	85	67	79	66		G2N3	56	0	0	86	55	124
	G3N1	0	0	0	156	0	0		G3N1	0	0	0	0	188	146
	G3N2	0	84	160	144	98	20		G3N2	0	0	0	0	0	68
	G3N3	0	0	0	0	180	0		G3N3	0	0	0	0	0	0
	W	Vehicle		Experiment		R	Vehicle		Experiment		NR	Vehicle		Experiment		DT	Vehicle		Experiment		C	Vehicle		Experiment
		AVE	SEM	AVE	SEM		AVE	SEM	AVE	SEM		AVE	SEM	AVE	SEM		AVE	SEM	AVE	SEM		AVE	SEM	AVE	SEM
	1-2 hr	113.812	15.7412	200.312	94.4425	1-2 hr	33.5625	8.64707	0.5	0.327327	1-2 hr	62.375	7.83009	82.1875	14.2089	1-2 hr	6.8125	2.29117	6.75	3.11534	1-2 hr	24.375	12.9307	5.25	3.68273
		W	R	NR	DT	C
	T tes	0.239	0.011	0.0465	0.851	0.121
