# Supplementary material for: Dual orexin and MCH neuron-ablated mice display severe sleep attacks and cataplexy
Source: eLife. 2020 Apr 21;9:e54275. doi: 10.7554/eLife.54275 (PMC7173968; doi:10.7554/eLife.54275)
Supplement: Figure 9—source data 1. [file elife-54275-fig9-data1.xlsx]

## Sheet: total time
		Vehicle								Experiment
	W	20:00:00	21:00:00	22:00:00	23:00:00	1900-01-01	1900-01-01 01:00:00		W	20:00:00	21:00:00	22:00:00	23:00:00	1900-01-01	1900-01-01 01:00:00
	G1N1	2912	2480	1976	2800	2204	2660		G1N1	3248	3160	2880	2784	2924	2820
	G1N2	2948	3100	2340	2840	2624	2764		G1N2	2772	2868	2896	3136	2868	2920
	G2N1	2684	3044	3144	3332	3200	3260		G2N1	3420	3428	3180	3120	3028	3120
	G2N2	3132	3048	3020	3292	3104	3300		G2N2	3392	3184	3152	3216	3128	2940
	G2N3	3072	3092	3028	3000	2992	3004		G2N3	3368	3304	3180	3376	3336	3124
	G3N1	2888	2524	2600	3088	3128	3228		G3N1	3444	3196	3264	3208	3228	3304
	G3N2	2836	2424	2300	2436	2384	2464		G3N2	3236	3100	3080	3016	3020	3064
	G3N3	2884	2444	2352	1832	2276	2516		G3N3	3600	3532	3468	2980	2992	3024
	R	22:00:00	23:00:00	1900-01-01	1900-01-01 01:00:00	1900-01-01 02:00:00	1900-01-01 03:00:00		R	22:00:00	23:00:00	1900-01-01	1900-01-01 01:00:00	1900-01-01 02:00:00	1900-01-01 03:00:00
	G1N1	0	0	20	0	20	4		G1N1	0	0	0	0	0	0
	G1N2	0	0	0	0	0	0		G1N2	0	0	0	0	0	0
	G2N1	56	0	0	0	0	0		G2N1	0	0	0	0	0	0
	G2N2	4	0	24	0	0	0		G2N2	0	0	0	0	4	0
	G2N3	0	0	0	0	0	0		G2N3	0	0	4	0	0	0
	G3N1	0	0	0	16	4	0		G3N1	0	0	0	0	0	0
	G3N2	40	232	140	20	152	0		G3N2	0	0	0	0	0	68
	G3N3	32	244	68	52	248	32		G3N3	0	20	0	0	0	0
	S	22:00:00	23:00:00	1900-01-01	1900-01-01 01:00:00	1900-01-01 02:00:00	1900-01-01 03:00:00		S	22:00:00	23:00:00	1900-01-01	1900-01-01 01:00:00	1900-01-01 02:00:00	1900-01-01 03:00:00
	G1N1	220	732	1228	256	948	192		G1N1	0	0	92	0	0	316
	G1N2	44	68	760	168	352	340		G1N2	108	0	0	44	64	36
	G2N1	500	340	4	144	4	36		G2N1	0	0	0	32	52	32
	G2N2	160	60	92	0	72	4		G2N2	0	0	0	0	20	324
	G2N3	48	0	68	44	0	0		G2N3	0	0	0	0	0	0
	G3N1	244	652	536	140	0	76		G3N1	0	0	0	8	0	0
	G3N2	448	844	968	928	860	644		G3N2	0	0	0	8	8	96
	G3N3	296	692	940	1524	784	1024		G3N3	0	48	28	172	144	116
	DT	22:00:00	23:00:00	1900-01-01	1900-01-01 01:00:00	1900-01-01 02:00:00	1900-01-01 03:00:00		DT	22:00:00	23:00:00	1900-01-01	1900-01-01 01:00:00	1900-01-01 02:00:00	1900-01-01 03:00:00
	G1N1	40	52	52	144	108	104		G1N1	16	16	0	24	48	88
	G1N2	88	112	136	192	124	44		G1N2	204	224	216	212	280	236
	G2N1	56	12	20	16	84	76		G2N1	0	0	0	24	0	0
	G2N2	52	32	112	132	132	72		G2N2	0	0	0	0	0	0
	G2N3	68	44	48	60	156	128		G2N3	0	0	0	0	0	0
	G3N1	76	104	88	40	100	168		G3N1	56	0	0	12	32	104
	G3N2	36	44	64	52	76	72		G3N2	12	36	28	308	200	236
	G3N3	168	92	60	0	24	28		G3N3	0	0	76	28	48	312
	C	22:00:00	23:00:00	1900-01-01	1900-01-01 01:00:00	1900-01-01 02:00:00	1900-01-01 03:00:00		C	22:00:00	23:00:00	1900-01-01	1900-01-01 01:00:00	1900-01-01 02:00:00	1900-01-01 03:00:00
	G1N1	428	336	324	400	320	640		G1N1	336	424	628	792	628	376
	G1N2	520	320	364	400	500	452		G1N2	516	508	488	208	388	408
	G2N1	304	204	432	108	312	228		G2N1	180	172	420	424	520	448
	G2N2	252	460	352	176	292	224		G2N2	208	416	448	384	448	336
	G2N3	412	464	456	496	452	468		G2N3	232	296	416	224	264	476
	G3N1	392	320	376	316	368	128		G3N1	100	404	336	372	340	192
	G3N2	240	56	128	164	128	420		G3N2	352	464	492	268	372	136
	G3N3	220	128	180	192	268	0		G3N3	0	0	28	420	416	148
	W	Vehicle		Experiment		R	Vehicle		Experiment		NR	Vehicle		Experiment		DT	Vehicle		Experiment		C	Vehicle		Experiment
		AVE	SEM	AVE	SEM		AVE	SEM	AVE	SEM		AVE	SEM	AVE	SEM		AVE	SEM	AVE	SEM		AVE	SEM	AVE	SEM
	1-3 hr	138.067	4.35418	161.15	3.57786	1-3 hr	1.79167	0.995899	0.05	0.041308	1-3 hr	20.7167	4.90532	0.575	0.285061	1-3 hr	3.45	0.534337	1.84167	1.28477	1-3 hr	15.975	1.88431	16.3833	2.7602
		W	R	NR	DT	C
	T tes	0.0105	0.1222	0.0156	0.5982	0.326

## Sheet: Bouts
		Vehicle								Experiment
	W	20:00:00	21:00:00	22:00:00	23:00:00	1900-01-01	1900-01-01 01:00:00		W	20:00:00	21:00:00	22:00:00	23:00:00	1900-01-01	1900-01-01 01:00:00
	G1N1	12	19	16	23	17	19		G1N1	7	9	13	12	13	18
	G1N2	18	13	19	17	15	10		G1N2	23	18	24	18	29	20
	G2N1	15	12	8	9	10	14		G2N1	3	4	6	10	9	8
	G2N2	15	18	19	12	19	14		G2N2	11	9	8	14	14	16
	G2N3	12	9	12	10	13	11		G2N3	9	13	14	6	5	7
	G3N1	16	17	18	13	13	16		G3N1	7	8	7	12	9	6
	G3N2	13	18	18	20	23	21		G3N2	7	10	9	16	13	22
	G3N3	15	13	16	15	13	28		G3N3	1	3	8	9	12	22
	R	22:00:00	23:00:00	1900-01-01	1900-01-01 01:00:00	1900-01-01 02:00:00	1900-01-01 03:00:00		R	22:00:00	23:00:00	1900-01-01	1900-01-01 01:00:00	1900-01-01 02:00:00	1900-01-01 03:00:00
	G1N1	0	0	1	0	1	1		G1N1	0	0	0	0	0	0
	G1N2	0	0	0	0	0	0		G1N2	0	0	0	0	0	0
	G2N1	2	0	0	0	0	0		G2N1	0	0	0	0	0	0
	G2N2	1	0	1	0	0	0		G2N2	0	0	0	0	1	0
	G2N3	0	0	0	0	0	0		G2N3	0	0	1	0	0	0
	G3N1	0	0	0	1	1	0		G3N1	0	0	0	0	0	0
	G3N2	2	3	2	1	5	0		G3N2	0	0	0	0	0	3
	G3N3	1	3	1	3	3	1		G3N3	0	3	0	0	0	0
	S	22:00:00	23:00:00	1900-01-01	1900-01-01 01:00:00	1900-01-01 02:00:00	1900-01-01 03:00:00		S	22:00:00	23:00:00	1900-01-01	1900-01-01 01:00:00	1900-01-01 02:00:00	1900-01-01 03:00:00
	G1N1	5	11	8	8	4	3		G1N1	0	0	1	0	0	3
	G1N2	2	1	7	1	3	2		G1N2	6	0	0	2	1	1
	G2N1	9	7	1	5	1	2		G2N1	0	0	0	1	4	2
	G2N2	3	1	4	0	6	1		G2N2	0	0	0	0	1	6
	G2N3	1	0	1	1	0	0		G2N3	0	0	0	0	0	0
	G3N1	8	6	8	5	0	1		G3N1	0	0	0	1	0	0
	G3N2	8	15	13	15	17	11		G3N2	0	0	0	2	2	4
	G3N3	9	6	12	14	8	26		G3N3	0	3	1	5	5	7
	DT	22:00:00	23:00:00	1900-01-01	1900-01-01 01:00:00	1900-01-01 02:00:00	1900-01-01 03:00:00		DT	22:00:00	23:00:00	1900-01-01	1900-01-01 01:00:00	1900-01-01 02:00:00	1900-01-01 03:00:00
	G1N1	3	3	3	9	8	7		G1N1	1	1	0	1	2	5
	G1N2	6	8	7	11	6	3		G1N2	12	13	13	12	19	15
	G2N1	3	1	1	1	6	4		G2N1	0	0	0	2	0	0
	G2N2	3	2	6	7	7	5		G2N2	0	0	0	0	0	0
	G2N3	4	3	3	2	6	6		G2N3	0	0	0	0	0	0
	G3N1	4	8	6	2	8	12		G3N1	3	0	0	1	2	3
	G3N2	3	2	4	3	5	4		G3N2	1	3	2	12	7	17
	G3N3	3	6	4	0	2	1		G3N3	0	0	5	1	3	13
	C	22:00:00	23:00:00	1900-01-01	1900-01-01 01:00:00	1900-01-01 02:00:00	1900-01-01 03:00:00		C	22:00:00	23:00:00	1900-01-01	1900-01-01 01:00:00	1900-01-01 02:00:00	1900-01-01 03:00:00
	G1N1	4	5	5	6	6	8		G1N1	5	7	11	11	12	11
	G1N2	9	4	4	5	6	5		G1N2	4	4	10	3	8	3
	G2N1	3	4	6	3	3	7		G2N1	2	3	5	7	6	6
	G2N2	8	16	7	4	5	7		G2N2	10	8	7	13	11	9
	G2N3	6	6	7	6	6	4		G2N3	8	12	13	5	4	6
	G3N1	3	2	3	5	4	3		G3N1	3	7	7	10	6	2
	G3N2	1	1	1	1	2	6		G3N2	5	6	6	2	3	2
	G3N3	2	1	2	1	2	0		G3N3	0	0	1	3	3	1
	W	Vehicle		Experiment		R	Vehicle		Experiment		NR	Vehicle		Experiment		DT	Vehicle		Experiment		C	Vehicle		Experiment
		AVE	SEM	AVE	SEM		AVE	SEM	AVE	SEM		AVE	SEM	AVE	SEM		AVE	SEM	AVE	SEM		AVE	SEM	AVE	SEM
	1-3 hr	45.125	2.58731	28.875	5.89927	1-3 hr	2.125	0.914906	0.5	0.377964	1-3 hr	18.25	3.95849	1.375	0.822398	1-3 hr	12	1.84197	6.75	4.53853	1-3 hr	13.75	3.16651	18	3.41739
		W	R	NR	DT	C
	T tes	0.0493	0.058	0.014	0.519	0.0138

## Sheet: Duration
		Vehicle								Experiment
	W	20:00:00	21:00:00	22:00:00	23:00:00	1900-01-01	1900-01-01 01:00:00		W	20:00:00	21:00:00	22:00:00	23:00:00	1900-01-01	1900-01-01 01:00:00
	G1N1	242	130	123	121	129	140		G1N1	464	351	221	232	224	156
	G1N2	163	238	123	167	174	276		G1N2	120	159	120	174	98	146
	G2N1	178	253	393	370	320	232		G2N1	1140	857	530	312	336	390
	G2N2	208	169	158	274	163	235		G2N2	308	353	394	229	223	183
	G2N3	256	343	252	300	230	273		G2N3	374	254	227	562	667	446
	G3N1	180	148	144	237	240	201		G3N1	492	399	466	267	358	550
	G3N2	218	134	127	121	103	117		G3N2	462	310	342	188	232	139
	G3N3	192	188	147	122	175	89		G3N3	3600	1177	433	331	249	137
	R	22:00:00	23:00:00	1900-01-01	1900-01-01 01:00:00	1900-01-01 02:00:00	1900-01-01 03:00:00		R	22:00:00	23:00:00	1900-01-01	1900-01-01 01:00:00	1900-01-01 02:00:00	1900-01-01 03:00:00
	G1N1	0	0	20	0	20	4		G1N1	0	0	0	0	0	0
	G1N2	0	0	0	0	0	0		G1N2	0	0	0	0	0	0
	G2N1	28	0	0	0	0	0		G2N1	0	0	0	0	0	0
	G2N2	4	0	24	0	0	0		G2N2	0	0	0	0	4	0
	G2N3	0	0	0	0	0	0		G2N3	0	0	4	0	0	0
	G3N1	0	0	0	16	4	0		G3N1	0	0	0	0	0	0
	G3N2	20	77	70	20	30	0		G3N2	0	0	0	0	0	22
	G3N3	32	81	68	17	82	32		G3N3	0	6	0	0	0	0
	S	22:00:00	23:00:00	1900-01-01	1900-01-01 01:00:00	1900-01-01 02:00:00	1900-01-01 03:00:00		S	22:00:00	23:00:00	1900-01-01	1900-01-01 01:00:00	1900-01-01 02:00:00	1900-01-01 03:00:00
	G1N1	44	66	153	32	237	64		G1N1	0	0	92	0	0	105
	G1N2	22	68	108	168	117	170		G1N2	18	0	0	22	64	36
	G2N1	55	48	4	28	4	18		G2N1	0	0	0	32	13	16
	G2N2	53	60	23	0	12	4		G2N2	0	0	0	0	20	54
	G2N3	48	0	68	44	0	0		G2N3	0	0	0	0	0	0
	G3N1	30	108	67	28	0	76		G3N1	0	0	0	8	0	0
	G3N2	56	56	74	61	50	58		G3N2	0	0	0	4	4	24
	G3N3	32	115	78	108	98	39		G3N3	0	16	28	34	28	16
	DT	22:00:00	23:00:00	1900-01-01	1900-01-01 01:00:00	1900-01-01 02:00:00	1900-01-01 03:00:00		DT	22:00:00	23:00:00	1900-01-01	1900-01-01 01:00:00	1900-01-01 02:00:00	1900-01-01 03:00:00
	G1N1	13	17	17	16	13	14		G1N1	16	16	0	24	24	17
	G1N2	14	14	19	17	20	14		G1N2	17	17	16	17	14	15
	G2N1	18	12	20	16	14	19		G2N1	0	0	0	12	0	0
	G2N2	17	16	18	18	18	14		G2N2	0	0	0	0	0	0
	G2N3	17	14	16	30	26	21		G2N3	0	0	0	0	0	0
	G3N1	19	13	14	20	12	14		G3N1	18	0	0	12	16	34
	G3N2	12	22	16	17	15	18		G3N2	12	12	14	25	28	13
	G3N3	56	15	15	0	12	28		G3N3	0	0	15	28	16	24
	C	22:00:00	23:00:00	1900-01-01	1900-01-01 01:00:00	1900-01-01 02:00:00	1900-01-01 03:00:00		C	22:00:00	23:00:00	1900-01-01	1900-01-01 01:00:00	1900-01-01 02:00:00	1900-01-01 03:00:00
	G1N1	107	67	64	66	53	80		G1N1	67	60	57	72	52	34
	G1N2	57	80	91	80	83	90		G1N2	129	127	48	69	48	136
	G2N1	101	51	72	36	104	32		G2N1	90	57	84	60	86	74
	G2N2	31	28	50	44	58	32		G2N2	20	52	64	29	40	37
	G2N3	68	77	65	82	75	117		G2N3	29	24	32	44	66	79
	G3N1	130	160	125	63	92	42		G3N1	33	57	48	37	56	96
	G3N2	240	56	128	164	64	70		G3N2	70	77	82	134	124	68
	G3N3	110	128	90	192	134	0		G3N3	0	0	28	140	138	148
	W	Vehicle		Experiment		R	Vehicle		Experiment		NR	Vehicle		Experiment		DT	Vehicle		Experiment		C	Vehicle		Experiment
		AVE	SEM	AVE	SEM		AVE	SEM	AVE	SEM		AVE	SEM	AVE	SEM		AVE	SEM	AVE	SEM		AVE	SEM	AVE	SEM
	1-3 hr	196.125	18.3374	564.708	182.184	1-3 hr	17.6667	8.92495	0.416667	0.279952	1-3 hr	59.8333	6.4945	6.41667	3.92375	1-3 hr	17.6667	1.58615	6.375	2.26729	1-3 hr	90.6667	12.794	55.625	10.4316
		W	R	NR	DT	C
	T tes	0.047	0.095	0.001	0.046	0.065
