# Supplementary material for: Dual orexin and MCH neuron-ablated mice display severe sleep attacks and cataplexy
Source: eLife. 2020 Apr 21;9:e54275. doi: 10.7554/eLife.54275 (PMC7173968; doi:10.7554/eLife.54275)
Supplement: Figure 10—source data 1. [file elife-54275-fig10-data1.xlsx]

## Sheet: FFT
S-R 0W	N1	N2	N3	N4	N5	N6	N7	N8			N1	N2	N3	N4	N5	N6	N7	N8
0	0.00753754	0.0107138	0.00918437	0.00648948		0.00648948	0.00496844	0.00634795		Delta	0.39999	0.439222	0.487599	0.378029		0.378029	0.333845	0.330669
1	0.0428044	0.0496006	0.0456692	0.0337469		0.0337469	0.0230895	0.0316572		Theta	0.329185	0.318018	0.322572	0.426065		0.426065	0.418399	0.428106			AVE					SEM
2	0.0860091	0.0920234	0.1028	0.0677272		0.0677272	0.0483164	0.0561109		Alpha	0.225264	0.199342	0.156986	0.158663		0.158663	0.199613	0.202152				0W	3W	4W	DT attack		0W	3W	4W	DTattack		AVE	Delta	Theta	Alpha	Beta
3	0.0948143	0.099547	0.122393	0.0901758		0.0901758	0.0884485	0.0829157		Beta	0.0380227	0.0327045	0.0236582	0.0307537		0.0307537	0.043175	0.032725		Hz	0	0.00739015	0.00736519	0.00566651	0.00394876	0	0.000737771	0.00182274	0.000698457	0.000234673		0W	0.392483	0.381201	0.185812	0.0331133
4	0.0931746	0.0966317	0.11684	0.0911588		0.0911588	0.10502	0.080783													1	0.0371878	0.0300787	0.0262466	0.0158762	1	0.00348667	0.00492106	0.00303098	0.00131931		3W	0.411577	0.38308	0.166298	0.0316806
5	0.083188	0.101419	0.0998958	0.0952206		0.0952206	0.0689703	0.0792019													2	0.0743877	0.0663464	0.0692626	0.0476312	2	0.00748938	0.00506054	0.00684584	0.00475421		4W	0.402415	0.378088	0.173872	0.039959
6	0.0629257	0.0851877	0.0807762	0.115874		0.115874	0.0727587	0.102098													3	0.0954958	0.108904	0.113079	0.106779	3	0.0048914	0.0104328	0.00446202	0.0111686		DC attack	0.404198	0.392661	0.155681	0.0435112
7	0.0656815	0.0684665	0.0713196	0.112767		0.112767	0.106159	0.104066													4	0.0963954	0.112078	0.110331	0.119207	4	0.00436819	0.0130608	0.00649378	0.00668419		SEM	Delta	Theta	Alpha	Beta
8	0.0617673	0.0551026	0.0569205	0.0807035		0.0807035	0.105744	0.0725236													5	0.0890166	0.0941706	0.0834957	0.114704	5	0.00458077	0.00739822	0.00869957	0.0118101		0W	0.0212497	0.0205544	0.0103533	0.00232068
9	0.06876	0.0521949	0.0565283	0.065634		0.065634	0.0721471	0.0745265													6	0.090785	0.0946944	0.0813724	0.104914	6	0.00789745	0.00735915	0.00782261	0.00541616		3W	0.0199692	0.0159536	0.00730384	0.00204239
10	0.0700507	0.0570666	0.0570276	0.0510859		0.0510859	0.06159	0.0748923													7	0.0916038	0.0933329	0.0878341	0.0971015	7	0.00828319	0.00381726	0.00351309	0.00412972		4W	0.0178184	0.0107669	0.0117127	0.00758326
11	0.0631602	0.0572934	0.047854	0.046054		0.046054	0.0569025	0.0684234													8	0.0733521	0.0826505	0.078529	0.0822419	8	0.00671754	0.00936006	0.00415386	0.00557211		DC attack	0.0166738	0.0128568	0.00509677	0.00251093
12	0.0511795	0.0484994	0.0349399	0.0389213		0.0389213	0.0471126	0.0458191													9	0.0650607	0.0593026	0.068514	0.0599835	9	0.00305696	0.00310395	0.00338355	0.00366348
13	0.0455814	0.0364173	0.0324239	0.0294335		0.0294335	0.0390992	0.036893													10	0.0603998	0.0530994	0.0618388	0.0484201	10	0.00345229	0.0019511	0.00455888	0.00170271
14	0.0359016	0.0326949	0.0248818	0.0251124		0.0251124	0.0342453	0.0308637													11	0.0551059	0.0532917	0.0572309	0.0412771	11	0.00333346	0.00370301	0.00907493	0.00164637
15	0.0294414	0.0244371	0.0168867	0.0191416		0.0191416	0.0222532	0.020153													12	0.0436276	0.040762	0.0415662	0.0353181	12	0.00227558	0.00284074	0.00257087	0.00127879
16	0.0180866	0.0148033	0.0103608	0.0137363		0.0137363	0.0184258	0.0142445													13	0.0356117	0.0302782	0.0318152	0.0297718	13	0.00218409	0.0018642	0.00205717	0.00132443			OXMC	DOX (-) 4w
17	0.00946645	0.00875937	0.00637648	0.00815465		0.00815465	0.0125951	0.00902931													14	0.0298303	0.0248529	0.023994	0.0263631	14	0.00179039	0.001644	0.00190054	0.00108551				Ttest			one way ANOVA repeated Bon
18	0.00578848	0.00495813	0.00395286	0.00472057		0.00472057	0.00687023	0.00518868													15	0.0216364	0.0171127	0.0192651	0.0229505	15	0.00159127	0.00193544	0.000916232	0.00104814			Delta	0.939772			Delta	Theta	Alpha	Beta
19	0.00317194	0.00290762	0.00205702	0.00284271		0.00284271	0.00363286	0.0028967													16	0.0147705	0.0133505	0.0173165	0.0175162	16	0.00104903	0.00115036	0.00393787	0.00103726			Theta	0.380391		0 3	1	1	0.60986	1
20	0.00150927	0.00127605	0.000911065	0.00129945		0.00129945	0.0016511	0.00136575													17	0.00893371	0.0090585	0.0111363	0.01184	17	0.000715178	0.000720888	0.00271751	0.000789848			Alpha	0.163966		0 4	1	1	1	1
0	1	1	1	1		1	1	1													18	0.00517136	0.00489757	0.00657186	0.00745998	18	0.000351999	0.000353467	0.0010275	0.000461862			Beta	0.555759		3 4	1	1	1	0.77827
																					19	0.00290737	0.00277767	0.00331676	0.00435797	19	0.00017781	0.000153624	0.000247583	0.000235059
S-R 3w	N1	N2	N3	N4	N5	N6	N7	N8			N1	N2	N3	N4	N5	N6	N7	N8			20	0.00133031	0.00159636	0.00161759	0.00233705	20	8.68505e-05	0.000101668	0.00011041	0.000137109
0	0.00604856	0.0181527	0.00430779	0.00487424		0.006162	0.00661326	0.00539774		Delta	0.467079	0.34786	0.378847	0.427653		0.348069	0.442727	0.468802				1	1	1	1
1	0.0202368	0.056543	0.0222158	0.0296221		0.0202966	0.036344	0.0252924		Theta	0.347388	0.455976	0.388357	0.362954		0.423696	0.347316	0.355871
2	0.0541148	0.0695152	0.0492032	0.0864735		0.0602546	0.0797037	0.0651598		Alpha	0.150451	0.152192	0.196834	0.166389		0.182067	0.173472	0.142678
3	0.142643	0.0611127	0.0945164	0.120084		0.0958286	0.133718	0.114423		Beta	0.0290331	0.0258181	0.0316545	0.0381299		0.0400068	0.0298713	0.0272506
4	0.16163	0.0562482	0.105016	0.113477		0.0855459	0.124367	0.138258
5	0.0884549	0.104441	0.107895	0.0779968		0.0861431	0.0685943	0.125668
6	0.0735371	0.120288	0.115203	0.0736543		0.103326	0.0796072	0.0972452
7	0.0858409	0.0806554	0.0941153	0.0943033		0.112803	0.0954498	0.0901629
8	0.0733942	0.134766	0.0589887	0.0826007		0.0876252	0.0716763	0.0695022
9	0.0607348	0.0724845	0.0592143	0.0594259		0.0636912	0.0460199	0.0535474
10	0.0538808	0.0477825	0.0608355	0.0529697		0.0562506	0.0545628	0.0454137
11	0.0531756	0.0457714	0.0640193	0.046744		0.0626705	0.061642	0.0390193
12	0.038036	0.031841	0.053089	0.0394681		0.0432127	0.046574	0.0331134
13	0.0247839	0.0375374	0.035979	0.0277699		0.0312145	0.0290691	0.0255933
14	0.0183189	0.0300088	0.0260222	0.029888		0.0242164	0.0207164	0.0247999
15	0.0161366	0.00703365	0.0177242	0.022519		0.0207526	0.0154705	0.0201526
16	0.0133707	0.00883418	0.0140557	0.0170864		0.0168301	0.0104643	0.0128123
17	0.00833425	0.00879207	0.00778828	0.0109759		0.0121476	0.00883238	0.00653904
18	0.00381758	0.00372741	0.00519776	0.00553891		0.00560823	0.0060702	0.00432288
19	0.00216107	0.00275871	0.00303342	0.00286694		0.00335517	0.00291932	0.00234905
20	0.00134953	0.00170577	0.00157938	0.00166167		0.00206576	0.00158509	0.00122729
0	1	1	1	1		1	1	1
S-R 4w	N1	N2	N3	N4	N5	N6	N7	N8			N1	N2	N3	N4	N5	N6	N7	N8
0	0.00498114	0.00275893	0.00484488	0.00804735		0.00481654	0.0075218	0.0066949		Delta	0.40235	0.306006	0.408733	0.430877		0.390068	0.451614	0.427255
1	0.0346969	0.0113968	0.0196474	0.0296014		0.0274271	0.0314567	0.0294995		Theta	0.364002	0.375749	0.408683	0.393047		0.402542	0.324171	0.378423
2	0.0941115	0.0369687	0.0692372	0.0852128		0.0645909	0.063858	0.0708589		Alpha	0.192691	0.230884	0.151064	0.137785		0.166749	0.179828	0.158099
3	0.120619	0.0937219	0.117375	0.127271		0.110091	0.120434	0.102044		Beta	0.0359758	0.0846025	0.026675	0.0302426		0.0358239	0.036865	0.0295285
4	0.0918117	0.116761	0.106167	0.110131		0.0938904	0.143483	0.11007
5	0.0611115	0.047157	0.0963057	0.0786615		0.094069	0.0923827	0.114783
6	0.0644799	0.0556313	0.0835072	0.0819232		0.111238	0.0680488	0.104778
7	0.0882469	0.0789401	0.0842976	0.096638		0.0966952	0.0737275	0.096293
8	0.0778135	0.09104	0.0833915	0.092986		0.0668027	0.066651	0.0710181
9	0.0621913	0.0727289	0.0839504	0.0707024		0.0681283	0.0666665	0.0552302
10	0.0712701	0.077409	0.0735364	0.0507978		0.0596779	0.049077	0.0511033
11	0.0580207	0.110097	0.0501487	0.0388615		0.0453248	0.048297	0.0498664
12	0.0437448	0.0521597	0.0381472	0.0317109		0.0381286	0.0475505	0.039522
13	0.0359085	0.0285138	0.0282921	0.0236403		0.03512	0.0395551	0.0316769
14	0.0320521	0.0193559	0.0179409	0.0244069		0.0272699	0.0263958	0.0205368
15	0.0229648	0.020757	0.0165354	0.0191659		0.0209062	0.0180297	0.0164967
16	0.0141076	0.0407436	0.0120345	0.0121733		0.0143996	0.015561	0.0121962
17	0.00862724	0.0271175	0.00693496	0.00714133		0.008847	0.0112492	0.00803678
18	0.00739037	0.0122491	0.00418677	0.00545009		0.00643158	0.00560402	0.00469113
19	0.00413132	0.00301412	0.00230504	0.00364733		0.00404475	0.0030221	0.00305267
20	0.00171928	0.00147817	0.0012137	0.00183063		0.00210098	0.00142868	0.00155165
0	1	1	1	1		1	1	1
DT 4w	N1	N2	N3	N4	N5	N6	N7	N8			N1	N2	N3	N4	N5	N6	N7	N8
0	0.00523304	0.00354156	0.00357704	0.00420857		0.00380395	0.00344016	0.00383699		Delta	0.480049	0.392721	0.416939	0.413632		0.330718	0.392394	0.402934
1	0.0218022	0.0124124	0.0137528	0.0165232		0.0184759	0.0120991	0.0160678		Theta	0.345367	0.373977	0.379652	0.382023		0.452997	0.405743	0.40887
2	0.0662166	0.0326325	0.0367496	0.0619268		0.0504352	0.0430633	0.0423943		Alpha	0.132855	0.173083	0.156286	0.15468		0.168529	0.158332	0.146
3	0.152623	0.0955544	0.0755636	0.136201		0.0910505	0.117949	0.0785109		Beta	0.0364958	0.0566785	0.0435456	0.0454554		0.0439517	0.0400916	0.0383598
4	0.139284	0.133002	0.124827	0.111779		0.0847869	0.122489	0.118284
5	0.100123	0.11912	0.166046	0.0872018		0.0859694	0.096793	0.147677
6	0.0916602	0.112043	0.122441	0.0912973		0.0976165	0.0952758	0.124066
7	0.0854738	0.0929541	0.0905331	0.0894781		0.117501	0.102486	0.101285
8	0.0738929	0.0698493	0.0730096	0.0886958		0.110709	0.0878698	0.0716672
9	0.0506581	0.051654	0.0519639	0.0637601		0.0764946	0.0672398	0.0581139
10	0.0436825	0.0474759	0.0417041	0.0487921		0.0506766	0.0528717	0.0537379
11	0.038762	0.0497715	0.0371259	0.0411149		0.0430229	0.0417205	0.0374223
12	0.0296452	0.0373523	0.0348387	0.0366235		0.0379021	0.0388768	0.0319883
13	0.0228311	0.0293753	0.031364	0.0301528		0.0341531	0.0314844	0.0290419
14	0.0214453	0.0287456	0.0276663	0.0246152		0.0301078	0.0254512	0.0265107
15	0.0201716	0.0278382	0.0252914	0.0221739		0.0233431	0.0207989	0.0210365
16	0.0140659	0.0218588	0.0187913	0.019497		0.0175776	0.0154848	0.0153379
17	0.00946844	0.016042	0.0111403	0.0127388		0.011531	0.0111349	0.0108246
18	0.00673861	0.0100491	0.00720523	0.00705984		0.00780651	0.00697565	0.00638493
19	0.00410516	0.00563399	0.00414703	0.00409075		0.00466557	0.0040966	0.00376667
20	0.0021177	0.00309463	0.00226168	0.00206894		0.00237098	0.00239967	0.00204572
0	1	1	1	1		1	1	1

## Sheet: EMG
	n1	n2	n3	n4	n5	n6	n7		AVE	SEM
SR	0.0565576	0.0634435	0.0647115	0.0783253	0.0771488	0.212592	0.143518		0.099471	0.021838
DT	0.0898082	0.0948385	0.107434	0.122555	0.123986	0.113257	0.179598		0.118782	0.0112461
								Ttest	0.369217
