# Supplementary material for: Dual orexin and MCH neuron-ablated mice display severe sleep attacks and cataplexy
Source: eLife. 2020 Apr 21;9:e54275. doi: 10.7554/eLife.54275 (PMC7173968; doi:10.7554/eLife.54275)
Supplement: Table 1—source data 1. [file elife-54275-table1-data1.xlsx]

## Sheet: Sheet1
				Orexin neuron-ablated Mice				Orexin and MCH-ablated Mice							Orexin neuron-ablated Mice		Orexin and MCH-ablated Mice
	Total time (sec)	Dark		W	R	S		W	R	S					ave	sem	ave	sem	- fold Difference (oxmc/ox)	Ttest
			N1	27018	1432	13996	N1	35840	104	3524				Total time in wakefulness during dark phase at 4 weeks	418.879	20.1788	570.981	22.1928	1.36312	0.00138087
			N2	23877	1646	17166	N2	38900	0	1552				Total time in NREM sleep during dark phase at 4 weeks	258.25	16.2331	90.4952	19.8136	0.350417	4.28859e-06
			N3	27294	1608	13630	N3	29952	16	8660				Total time in REM sleep during dark phase at 4 weeks	25.5708	0.904115	2.67619	1.65919	0.104658	0.000284119
			N4	22342	1451	17188	N4	36200	92	3600				Total time in wakefulness during light phase at 4 weeks	278.067	19.7423	322.571	7.33206	1.16005	0.030792
							N5	35080	0	4120				Total time in NREM sleep during light phase at 4 weeks	389.8	17.3507	340.114	8.14185	0.872535	0.00268942
							N6	34792	172	6156				Total time in REM sleep during light phase at 4 weeks	46.325	3.36156	20.8095	4.23429	0.449207	0.0156155
							N7	29048	740	10396				Total time in cataplexy in dark phase at 4 weeks	11.0167	0.602695	31.2	3.6035	2.83207	0.00259712
														Number of cataplexy bouts in dark phase at 4 weeks	14.75	2.01556	16.8571	2.10926	1.14286	0.527587
														Mean bout duration in dark phase at 4 weeks	53.25	7.59797	113	9.56681	2.12207	0.00215547
		Light		W	R	S		W	R	S				Total time in cataplexy in light phase at 4 weeks	5.4375	0.885855	24.1714	4.53046	4.44532	0.0140763
			N1	18652	2538	21692	N1	17912	844	21676				Number of cataplexy bouts in light phase at 4 weeks	8.25	1.43614	15.4286	3.06949	1.87013	0.12813
			N2	13670	2920	26176	N2	21140	112	19648				Mean bout duration in light phase at 4 weeks	50	11.3652	96.2857	4.77949	1.92571	0.00166525
			N3	15916	3280	23780	N3	18936	1384	19604
			N4	18498	2380	21904	N4	19064	1056	20344
							N5	18364	1636	22144
							N6	19440	1456	20984
							N7	20624	2252	18448
				Orexin neuron-ablated Mice				Orexin and MCH-ablated Mice
				Cataplexy				Cataplexy
				Total time (sec)	Bouts	Duration (sec)		Total time (sec)	Bouts	Duration (sec)
		Dark	N1	748	17	76	N1	2152	15	143
			N2	572	9	45	N2	1680	20	84
			N3	672	18	45	N3	2424	19	127
			N4	652	15	47	N4	1588	14	113
							N5	2672	27	98
							N6	1016	12	84
							N7	1572	11	142
		Light	N1	245	8	32	N1	1256	11	114
			N2	420	8	46	N2	1532	16	95
			N3	224	5	39	N3	2536	25	101
			N4	416	12	83	N4	2244	27	83
							N5	520	5	104
							N6	900	9	100
							N7	1164	15	77
